# Supplementary material for: Regio- and diastereoselective synthesis of trans-3,4-diaryldihydrocoumarins via metal-free [4+2] annulation of ynamides with o-hydroxybenzyl alcohols
Source: Royal Society of Chemistry journal article supplement (doi:10.1039/d1cc00687h), 2021-01-01

Institute of New Materials & Industry Technology, College of Chemistry & Materials  
Engineering, Wenzhou University, Wenzhou 325035, China

| <b>Content</b>                                               | <b>Page Number</b> |
|--------------------------------------------------------------|--------------------|
| <b>General</b>                                               | 2                  |
| <b>More Reaction Condition Studies and Mechanism Studies</b> | 3                  |
| <b>General Procedure: Metal-Free [4+2] Annulation</b>        | 5                  |
| <b>References</b>                                            | 20                 |
| <b><sup>1</sup>H and <sup>13</sup>C NMR Spectra</b>          | 21                 |

**General Information.** Acetonitrile (ACS grade), toluene (ACS grade), ethyl acetate (ACS grade) and hexanes (ACS grade) were obtained commercially and used without further purification. Methylene chloride, tetrahydrofuran and diethyl ether were purified according to standard methods unless otherwise noted. Commercially available reagents were used without further purification. Reactions were monitored by thin layer chromatography (TLC) using silicycle pre-coated silica gel plates. Flash column chromatography was performed over silica gel (300-400 mesh). Infrared spectra were recorded on a Nicolet AVATER FTIR330 spectrometer as thin film and are reported in reciprocal centimeter ( $\text{cm}^{-1}$ ). Mass spectra were recorded with Micromass QTOF2 Quadrupole/Time-of-Flight Tandem mass spectrometer using electron spray ionization.  $^1\text{H}$  NMR spectra and  $^{13}\text{C}$  NMR spectra were recorded on a Bruker AV-400 spectrometer and a Bruker AV-500 spectrometer in chloroform- $\text{d}_3$ . Chemical shifts are reported in ppm with the internal TMS signal at 0.0 ppm as a standard for  $^1\text{H}$  NMR spectra and with the internal chloroform signal at 77.0 ppm as a standard for  $^{13}\text{C}$  NMR spectra. The data is being reported as (s = singlet, d = doublet, t = triplet, m = multiplet or unresolved, brs = broad singlet, coupling constant(s) in Hz, integration).

## More Reaction Condition Studies

### 1. For the optimization of reaction conditions

**Table 1** Optimization of reaction conditions<sup>a</sup>

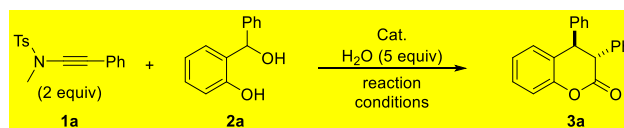

| Entry             | Catalyst             | Conditions             | Yield (%) <sup>b</sup> | Trans/Cis <sup>c</sup> |
|-------------------|----------------------|------------------------|------------------------|------------------------|
| 1 <sup>d</sup>    | AlCl <sub>3</sub>    | DCE, 80 °C, 30 min     | <5                     | -                      |
| 2 <sup>d</sup>    | Cu(OTf) <sub>2</sub> | DCE, 80 °C, 30 min     | 40                     | 1:1                    |
| 3 <sup>d</sup>    | Zn(OTf) <sub>2</sub> | DCE, 80 °C, 30 min     | 48                     | 1:1                    |
| 4 <sup>d</sup>    | Sc(OTf) <sub>3</sub> | DCE, 80 °C, 20 min     | 72                     | 1:1                    |
| 5 <sup>d</sup>    | Fe(OTf) <sub>3</sub> | DCE, 80 °C, 20 min     | 55                     | 1:1                    |
| 6 <sup>e</sup>    | TsOH                 | DCE, 80 °C, 30 min     | 20                     | 1:1                    |
| 7 <sup>e</sup>    | MsOH                 | DCE, 80 °C, 30 min     | <2                     | -                      |
| 8 <sup>e</sup>    | HOTf                 | DCE, 80 °C, 12 h       | 47                     | 1:1                    |
| 9 <sup>e</sup>    | HNTf <sub>2</sub>    | DCE, 80 °C, 20 min     | 90                     | 1:1                    |
| 10 <sup>e</sup>   | HNTf <sub>2</sub>    | THF, 80 °C, 24 h       | <2                     | -                      |
| 11 <sup>e</sup>   | HNTf <sub>2</sub>    | toluene, 80 °C, 30 min | 64                     | 1:1                    |
| 12 <sup>d</sup>   | HNTf <sub>2</sub>    | DCE, 80 °C, 20 min     | 78                     | 1:1                    |
| 13 <sup>e,f</sup> | HNTf <sub>2</sub>    | DCE, 60 °C, 20 min     | 80                     | 1:1                    |
| 14 <sup>e,f</sup> | HNTf <sub>2</sub>    | DCE, 80 °C, 20 min     | 90(86)                 | 9:1                    |

<sup>a</sup> Reaction conditions: [**1a**] = 0.1 M; DCE: 1, 2-dichloroethane. <sup>b</sup> Measured by <sup>1</sup>H NMR using diethyl phthalate as the internal standard and isolated yield was shown in parentheses. <sup>c</sup> Diastereoselectivity was detected by crude <sup>1</sup>H NMR and relative configuration was detected by reference **5a**. <sup>d</sup> 10 mol % of catalyst. <sup>e</sup> 20 mol % of catalyst. <sup>f</sup> after 20 min, Cs<sub>2</sub>CO<sub>3</sub> (1.5 equiv) was added, rt, 3 h.

**2.** For the optimization of diastereoselectivity with bases conditions on the [4+2] annulation of ynamide **1a** and *o*-hydroxybenzyl alcohol **2a**, please see as followed:<sup>a</sup>

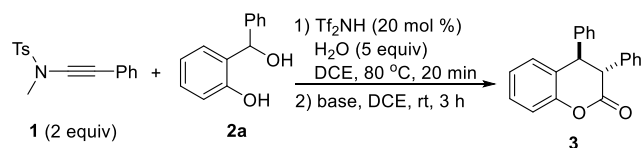

| Entry          | Base                                        | Yield (%) <sup>b</sup> | Trans/Cis <sup>c</sup> |
|----------------|---------------------------------------------|------------------------|------------------------|
| 1              | DBU (1.5 equiv)                             | 86                     | 8:1                    |
| 2              | Et <sub>3</sub> N (1.5 equiv)               | 90                     | 1:1                    |
| 3              | DMAP (1.5 equiv)                            | 90                     | 3:1                    |
| 4              | K <sub>2</sub> CO <sub>3</sub> (1.5 equiv)  | 90                     | 1:1                    |
| 5              | K <sub>3</sub> PO <sub>4</sub> (1.5 equiv)  | 90                     | 1:1                    |
| 6              | Cs <sub>2</sub> CO <sub>3</sub> (1.5 equiv) | 90                     | 9:1                    |
| 7              | Cs <sub>2</sub> CO <sub>3</sub> (2 equiv)   | 88                     | 9:1                    |
| 8 <sup>d</sup> | Cs <sub>2</sub> CO <sub>3</sub> (1.5 equiv) | 86                     | 9:1                    |

<sup>a</sup> Reaction conditions: [**1a**] = 0.1 M; DCE: 1, 2-dichloroethane. <sup>b</sup> Measured by <sup>1</sup>H NMR using diethyl phthalate as the internal standard. <sup>c</sup> Diastereoselectivity was detected by crude <sup>1</sup>H NMR. <sup>d</sup> Reaction time is 4 h after Cs<sub>2</sub>CO<sub>3</sub> was added.

3. For the optimization of other solvents and nucleophiles on the [4+2] annulation of ynamide **1a** and *o*-hydroxybenzyl alcohol **2a**, please see as followed:<sup>a</sup>

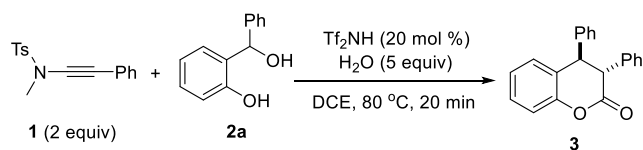

| Entry | Variations from standard conditions     | Yield (%) <sup>b</sup> | <i>Trans/Cis</i> <sup>c</sup> |
|-------|-----------------------------------------|------------------------|-------------------------------|
| 1     | PhCl instead of DCE                     | 20                     | 1:1                           |
| 2     | $\text{CH}_3\text{NO}_2$ instead of DCE | 17                     | 1:1                           |
| 3     | Dioxane instead of DCE                  | 8                      | 1:1                           |
| 4     | MeOH instead of DCE                     | < 2                    | 1:1                           |
| 5     | MeOH instead of $\text{H}_2\text{O}$    | 36                     | 1:1                           |
| 6     | EtOH instead of $\text{H}_2\text{O}$    | 32                     | 1:1                           |
| 7     | PhOH instead of $\text{H}_2\text{O}$    | < 19                   | 1:1                           |

<sup>a</sup>Reaction conditions: [**1a**] = 0.1 M; DCE: 1, 2-dichloroethane. <sup>b</sup>Measured by <sup>1</sup>H NMR using diethyl phthalate as the internal standard. <sup>c</sup>Diastereoselectivity was detected by crude <sup>1</sup>H NMR.

### Mechanism Studies

4. For the enolate-type mechanism of this metal-free [4+2] annulation.

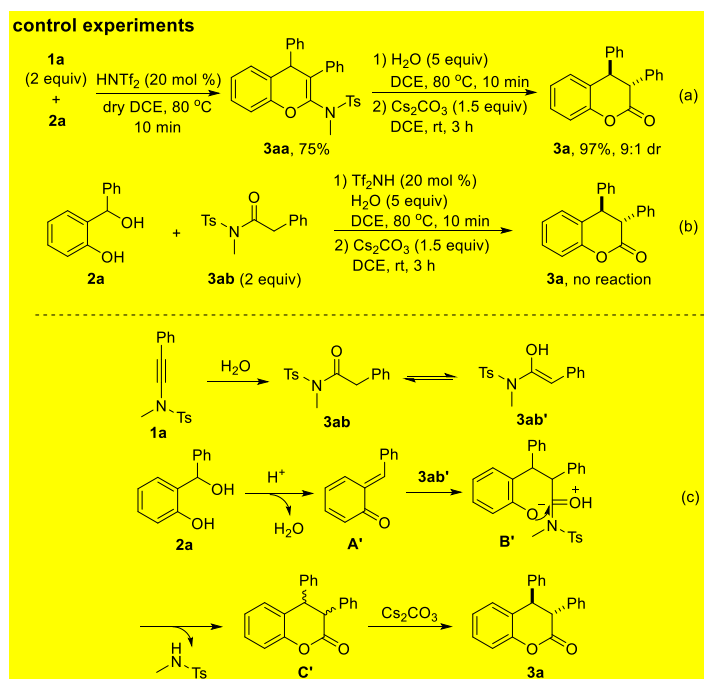

Scheme 1

Compounds **1a–1m**, **2a–2m** and **3ab** were known and the spectroscopic data match those reported.<sup>1,4</sup>

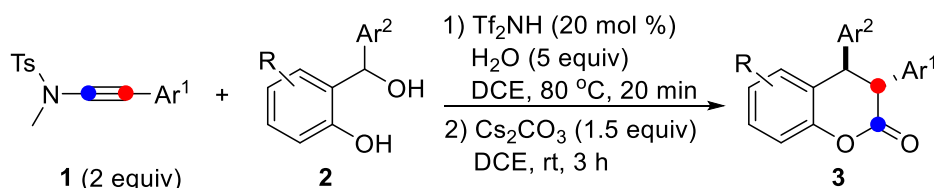

General procedure for the synthesis of *trans*-3,4-diaryldihydrocoumarins **3**:

HNTf<sub>2</sub> (0.04 mmol, 11.2 mg) was added to a mixture of the ynamides **1** (0.40 mmol), *o*-hydroxybenzyl alcohols **2** and H<sub>2</sub>O (1 mmol) in DCE (4.0 mL) at room temperature. Then, the reaction mixture was stirred at 80 °C and the progress of the reaction was monitored by TLC. The reaction typically took 20 min. Upon completion, the mixture was concentrated and the residue was purified by chromatography on silica gel (eluent: hexanes/ethyl acetate) to afford the diastereomers, which was add Cs<sub>2</sub>CO<sub>3</sub> (0.3 mmol, 97.7 mg) in DCE (4.0 mL) at room temperature and stirred for 3 h. Upon completion, the mixture was filtered, concentrated and purified to produce the desired *trans*-3,4-diarylcoumarins **3**.

### 3,4-diphenylchroman-2-one (**3a**)

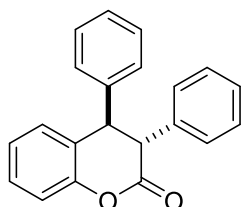

Starting from **2a** (40.0 mg, 0.20 mmol) and **1a** (114.0 mg, 0.4 mmol) according to the general procedure to provide **3a** in 86% yield (51.6 mg, 9:1 dr); White solid, mp 115–117 °C; <sup>1</sup>H NMR (400 MHz, CDCl<sub>3</sub>) δ 7.27 – 6.97 (m, 13H), 6.86 (d, *J* = 7.6 Hz, 1H), 4.44 (d, *J* = 7.2 Hz, 1H), 4.15 (d, *J* = 7.2 Hz, 1H); <sup>13</sup>C NMR (125 MHz, CDCl<sub>3</sub>) δ 168.4, 151.2, 140.0, 135.8, 129.1, 129.0, 128.9, 128.7, 128.1, 128.0, 127.6, 127.5, 124.8(4), 124.8(2), 116.8, 53.2, 48.3; HRMS (ESI, *m/z*) calcd. for C<sub>21</sub>H<sub>16</sub>NaO<sub>2</sub> [M+Na]<sup>+</sup>: 323.1043, found: 323.1065; IR (KBr, cm<sup>-1</sup>) 3034, 2921, 2851, 1752, 1486, 1453, 1222, 1146, 1103, 772, 499.

### 4-phenyl-3-(*p*-tolyl)chroman-2-one (**3b**)

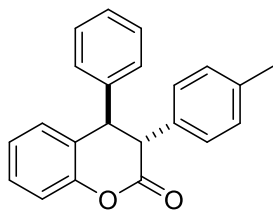

Starting from **2a** (40.0 mg, 0.20 mmol) and **1b** (119.6 mg, 0.4 mmol) according to the general procedure to provide **3b** in 79% yield (49.6 mg, 8:1 dr); White solid, mp 139-141 °C; <sup>1</sup>H NMR (400 MHz, CDCl<sub>3</sub>) δ 7.25 – 6.89 (m, 12H), 6.85 (d, *J* = 7.6 Hz, 1H), 4.42 (d, *J* = 7.2 Hz, 1H), 4.12 (d, *J* = 7.2 Hz, 1H) 2.16 (s, 3H); <sup>13</sup>C NMR (125 MHz, CDCl<sub>3</sub>) δ 168.5, 151.2, 140.2, 137.3, 132.7, 129.4, 129.1, 128.9(3), 128.8(6), 127.9, 127.8, 127.4, 124.9, 124.8, 116.8, 52.8 48.2, 22.0; **HRMS (ESI, *m/z*)** calcd. for C<sub>22</sub>H<sub>18</sub>NaO<sub>2</sub> [M+Na]<sup>+</sup>: 337.1199, found: 337.1201; IR (KBr, cm<sup>-1</sup>) 3034, 2922, 1757, 1483, 1453, 1275, 1222, 1139, 1099, 954, 753.

### 3-(4-methoxyphenyl)-4-phenylchroman-2-one (**3c**)

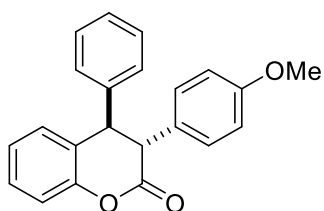

Starting from **2a** (40.0 mg, 0.20 mmol) and **1c** (126.0 mg, 0.4 mmol) according to the general procedure to provide **3c** in 70% yield (46.2 mg, 9:1 dr); White solid, mp 121-123 °C; <sup>1</sup>H NMR (400 MHz, CDCl<sub>3</sub>) δ 7.38 – 7.08 (m, 10H), 6.99 (d, *J* = 7.6 Hz, 1H), 6.80 (d, *J* = 8.8 Hz, 2H), 4.54 (d, *J* = 7.2 Hz, 1H), 4.23 (d, *J* = 7.2 Hz, 1H), 3.77 (s, 3H); <sup>13</sup>C NMR (125 MHz, CDCl<sub>3</sub>) δ 168.7, 158.8, 151.2, 140.1, 131.1, 129.1(3), 129.0(8), 128.9(5), 128.9, 128.0, 127.4, 125.0, 124.8, 116.8, 114.1, 55.1, 52.4, 48.3; **HRMS (ESI, *m/z*)** calcd. for C<sub>22</sub>H<sub>18</sub>NaO<sub>3</sub> [M+Na]<sup>+</sup>: 353.1148, found: 353.1157; IR (KBr, cm<sup>-1</sup>) 3039, 2959, 2921, 1756, 1513, 1452, 1248, 1137, 770, 698.

### 3-(4-fluorophenyl)-4-phenylchroman-2-one (**3d**)

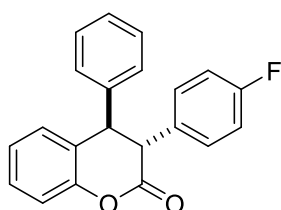

Starting from **2a** (40.0 mg, 0.20 mmol) and **1d** (121.2 mg, 0.4 mmol) according to the general procedure to provide **3d** in 77% yield (49.0 mg, 5:1 dr); White solid, mp 130-132 °C; <sup>1</sup>H NMR (400 MHz, CDCl<sub>3</sub>) δ 7.29 – 6.97 (m, 10H), 6.84 – 6.77 (m, 3H), 4.39 (d, *J* = 8.4 Hz, 1H), 4.10 (d, *J* = 8.4 Hz, 1H); <sup>13</sup>C NMR (125 MHz, CDCl<sub>3</sub>) δ 168.4, 162.0 (d, *J*<sub>C,F</sub> = 246.5 Hz), 151.2, 139.5, 131.5 (d, *J*<sub>C,F</sub> = 3.5 Hz), 130.0 (d, *J*<sub>C,F</sub> = 8.0 Hz), 129.0(1), 128.9(9), 128.9(7), 128.2, 127.6, 125.1, 124.9, 116.9, 115.6 (d, *J*<sub>C,F</sub> = 21.5 Hz), 52.4, 48.3; **HRMS (ESI, *m/z*)** calcd. for C<sub>21</sub>H<sub>15</sub>FNaO<sub>2</sub> [M+Na]<sup>+</sup>: 341.0948, found: 341.0948; IR (KBr, cm<sup>-1</sup>) 3067, 2922, 1750, 1511, 1485, 1452, 1223, 752, 502.

### 3-(4-chlorophenyl)-4-phenylchroman-2-one (**3e**)

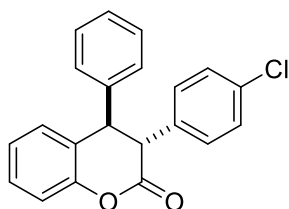

Starting from **2a** (40.0 mg, 0.20 mmol) and **1e** (128.0 mg, 0.4 mmol) according to the general procedure to provide **3e** in 73% yield (48.9 mg, 7:1 dr); White solid, mp 130-132 °C; <sup>1</sup>H NMR (400 MHz, CDCl<sub>3</sub>) δ 7.39 – 7.08 (m, 12H), 6.93 (d, *J* = 7.6 Hz, 1H), 4.53 (d, *J* = 8.8 Hz, 1H), 4.23 (d, *J* = 8.8 Hz, 1H); <sup>13</sup>C NMR (125 MHz, CDCl<sub>3</sub>) δ 168.1, 151.1, 139.3, 134.2, 133.5, 129.7, 129.1, 129.0(3), 128.9(6), 128.8, 128.2, 127.7, 125.0, 124.9, 116.8, 52.6, 48.2; **HRMS (ESI, *m/z*)** calcd. for C<sub>21</sub>H<sub>15</sub>ClNaO<sub>2</sub> [M+Na]<sup>+</sup>: 357.0653, found: 357.0654; IR (KBr, cm<sup>-1</sup>) 3027, 2921, 1761, 1484, 1450, 1223, 1149, 1090, 755, 499.

### 3-(4-bromophenyl)-4-phenylchroman-2-one (**3f**)

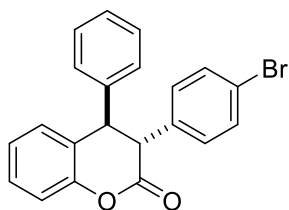

Starting from **2a** (40.0 mg, 0.20 mmol) and **1f** (145.6 mg, 0.4 mmol) according to the general procedure to provide **3f** in 73% yield (56.1 mg, 12:1 dr); White solid, mp 149-151 °C; <sup>1</sup>H NMR (400 MHz, CDCl<sub>3</sub>) δ 7.28 – 6.98 (m, 10H), 6.90 (d, *J* = 8.4 Hz, 2H), 6.80 (d, *J* = 7.6 Hz, 1H), 4.40 (d, *J* = 8.8 Hz, 1H), 4.08 (d, *J* = 8.8 Hz, 1H); <sup>13</sup>C NMR

(125 MHz, CDCl<sub>3</sub>)  $\delta$  168.0, 151.1, 139.3, 134.7, 131.8, 130.0, 129.0(6), 129.0(5), 128.9(6), 128.1, 127.7, 125.0, 124.9, 121.7, 116.8, 52.7, 48.1; **HRMS (ESI, *m/z*)** calcd. for C<sub>21</sub>H<sub>15</sub>BrNaO<sub>2</sub> [M+Na]<sup>+</sup>: 401.0148, found: 401.0146; IR (KBr, cm<sup>-1</sup>) 3027, 2922, 1762, 1486, 1452, 1224, 1149, 754, 500.

#### 4-phenyl-3-(*m*-tolyl)chroman-2-one (**3g**)

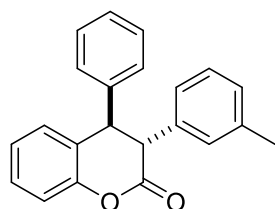

Starting from **2a** (40.0 mg, 0.20 mmol) and **1g** (119.6 mg, 0.4 mmol) according to the general procedure to provide **3g** in 72% yield (45.2 mg, 8:1 dr); White solid, mp 171-173 °C; <sup>1</sup>H NMR (400 MHz, CDCl<sub>3</sub>)  $\delta$  7.27 – 6.97 (m, 9H), 6.92 (d, *J* = 7.6 Hz, 1H), 6.87 (d, *J* = 7.2 Hz, 2H), 6.82 (d, *J* = 7.6 Hz, 1H), 4.43 (d, *J* = 6.8 Hz, 1H), 4.12 (d, *J* = 6.8 Hz, 1H), 2.16 (s, 3H); <sup>13</sup>C NMR (125 MHz, CDCl<sub>3</sub>)  $\delta$  168.4, 151.3, 140.3, 138.3, 135.7, 129.1, 129.0, 128.9, 128.8(4), 128.7(5), 128.5, 128.4, 127.9, 127.4, 124.8, 124.7, 116.8, 53.2, 48.3, 21.3; **HRMS (ESI, *m/z*)** calcd. for C<sub>22</sub>H<sub>18</sub>NaO<sub>2</sub> [M+Na]<sup>+</sup>: 337.1199, found: 337.1207; IR (KBr, cm<sup>-1</sup>) 3029, 2921, 2851, 1755, 1452, 1224, 1145, 1103, 768, 699.

#### 3-(3-methoxyphenyl)-4-phenylchroman-2-one (**3h**)

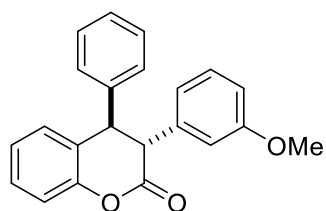

Starting from **2a** (40.0 mg, 0.20 mmol) and **1h** (126.0 mg, 0.4 mmol) according to the general procedure to provide **3h** in 72% yield (47.5 mg, 9:1 dr); White solid, mp 149-150 °C; <sup>1</sup>H NMR (400 MHz, CDCl<sub>3</sub>)  $\delta$  7.25 – 6.98 (m, 9H), 6.87 (d, *J* = 7.6 Hz, 1H), 6.65 (d, *J* = 7.6 Hz, 2H), 6.58 (s, 1H), 4.44 (d, *J* = 6.4 Hz, 1H), 4.13 (d, *J* = 6.4 Hz, 1H), 3.60 (s, 3H); <sup>13</sup>C NMR (125 MHz, CDCl<sub>3</sub>)  $\delta$  168.2, 159.6, 151.3, 140.1, 137.2, 129.7, 129.1, 128.9(9), 128.9(5), 127.9, 127.5, 124.9, 124.8, 120.3, 116.8, 114.0, 113.0, 55.1, 53.2, 48.2; **HRMS (ESI, *m/z*)** calcd. for C<sub>22</sub>H<sub>18</sub>NaO<sub>3</sub> [M+Na]<sup>+</sup>: 353.1148, found:



353.1156; IR (KBr,  $\text{cm}^{-1}$ ) 3064, 2999, 2922, 2839, 1764, 1483, 1452, 1222, 1136, 760.

### 3-(3-fluorophenyl)-4-phenylchroman-2-one (3i)

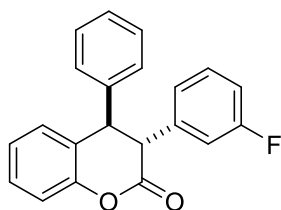

Starting from **2a** (40.0 mg, 0.20 mmol) and **1i** (121.2 mg, 0.4 mmol) according to the general procedure to provide **3i** in 77% yield (49.0 mg, 7:1 dr); White solid, mp 153-155 °C;  $^1\text{H}$  NMR (400 MHz,  $\text{CDCl}_3$ )  $\delta$  7.28 – 6.98 (m, 10H), 6.85 – 6.75 (m, 3H), 4.42 (d,  $J = 8.4$  Hz, 1H), 4.12 (d,  $J = 8.4$  Hz, 1H);  $^{13}\text{C}$  NMR (125 MHz,  $\text{CDCl}_3$ )  $\delta$  167.9, 162.7 (d,  $J_{\text{C,F}} = 246.5$  Hz), 151.1, 139.4, 138.0 (d,  $J_{\text{C,F}} = 7.5$  Hz), 130.1 (d,  $J_{\text{C,F}} = 8.5$  Hz), 129.0(7), 129.0(2), 128.9(6), 128.1, 127.6, 124.9(1), 124.8(6), 124.0 (d,  $J_{\text{C,F}} = 3.0$  Hz), 116.8, 115.4 (d,  $J_{\text{C,F}} = 22.5$  Hz), 114.7 (d,  $J_{\text{C,F}} = 21.0$  Hz), 52.9 (d,  $J_{\text{C,F}} = 1.5$  Hz), 48.1; **HRMS (ESI,  $m/z$ )** calcd. for  $\text{C}_{21}\text{H}_{15}\text{FNaO}_2$  [ $\text{M}+\text{Na}$ ] $^+$ : 341.0948, found: 341.0953; IR (KBr,  $\text{cm}^{-1}$ ) 3071, 2922, 1757, 1486, 1452, 1225, 1160, 1153, 753, 695.

### 3-(3-chlorophenyl)-4-phenylchroman-2-one (3j)

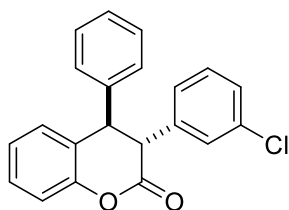

Starting from **2a** (40.0 mg, 0.20 mmol) and **1j** (128.0 mg, 0.4 mmol) according to the general procedure to provide **3j** in 70% yield (46.9 mg, 6:1 dr); White solid, mp 156-158 °C;  $^1\text{H}$  NMR (400 MHz,  $\text{CDCl}_3$ )  $\delta$  7.30 – 6.98 (m, 11H), 6.90 (d,  $J = 6.4$  Hz, 1H), 6.82 (d,  $J = 7.6$  Hz, 1H), 4.41 (d,  $J = 8.4$  Hz, 1H), 4.09 (d,  $J = 8.4$  Hz, 1H);  $^{13}\text{C}$  NMR (125 MHz,  $\text{CDCl}_3$ )  $\delta$  167.8, 151.1, 139.3, 137.6, 134.4, 129.8, 129.1, 129.0(4), 128.9(6), 128.6, 128.1, 127.9, 127.7, 126.4, 124.9, 124.8, 116.8, 52.8, 48.1; **HRMS (ESI,  $m/z$ )** calcd. for  $\text{C}_{21}\text{H}_{15}\text{ClNaO}_2$  [ $\text{M}+\text{Na}$ ] $^+$ : 357.0653, found: 357.0654; IR (KBr,  $\text{cm}^{-1}$ ) 3072, 2921, 1760, 1483, 1453, 1222, 1155, 1103, 750, 500.

### 3-(3-bromophenyl)-4-phenylchroman-2-one (3k)

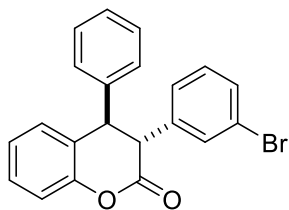

Starting from **2a** (40.0 mg, 0.20 mmol) and **1k** (145.6 mg, 0.4 mmol) according to the general procedure to provide **3k** in 74% yield (56.1 mg, 5:1 dr); White solid, mp 142-144 °C;  $^1\text{H}$  NMR (400 MHz,  $\text{CDCl}_3$ )  $\delta$  7.30 – 6.93 (m, 12H), 6.82 (d,  $J = 7.6$  Hz, 1H), 4.41 (d,  $J = 8.4$  Hz, 1H), 4.08 (d,  $J = 8.4$  Hz, 1H);  $^{13}\text{C}$  NMR (125 MHz,  $\text{CDCl}_3$ )  $\delta$  167.8, 151.1, 139.3, 137.9, 131.5, 130.8, 130.1, 129.1, 129.0(4), 128.9(6), 128.1, 127.7, 126.8, 124.9, 124.8, 122.6, 116.8, 52.8, 48.1; **HRMS (ESI,  $m/z$ )** calcd. for  $\text{C}_{21}\text{H}_{15}\text{BrNaO}_2$   $[\text{M}+\text{Na}]^+$ : 401.0148, found: 401.0148; IR (KBr,  $\text{cm}^{-1}$ ) 3062, 2923, 1748, 1454, 1149, 751, 699.

#### 4-phenyl-3-(*o*-tolyl)chroman-2-one (**3l**)

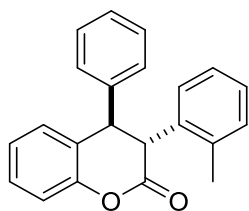

Starting from **2a** (40.0 mg, 0.20 mmol) and **1l** (119.6 mg, 0.4 mmol) according to the general procedure to provide **3l** in 81% yield (50.9 mg, 7:1 dr); White solid, mp 172-173 °C;  $^1\text{H}$  NMR (500 MHz,  $\text{CDCl}_3$ )  $\delta$  7.28 – 6.94 (m, 9H), 6.91 (d,  $J = 7.5$  Hz, 1H), 6.86 (d,  $J = 8.5$  Hz, 2H), 6.82 (d,  $J = 7.5$  Hz, 1H), 4.43 (d,  $J = 7.0$  Hz, 1H), 4.11 (d,  $J = 7.0$  Hz, 1H), 2.16 (s, 3H);  $^{13}\text{C}$  NMR (125 MHz,  $\text{CDCl}_3$ )  $\delta$  168.4, 151.3, 140.3, 138.3, 135.7, 129.1, 128.9(4), 128.8(8), 128.8(3), 128.5, 128.4, 127.9, 127.4, 124.8(1), 124.8(0), 124.7, 116.8, 53.2, 48.3, 21.3; **HRMS (ESI,  $m/z$ )** calcd. for  $\text{C}_{22}\text{H}_{18}\text{NaO}_2$   $[\text{M}+\text{Na}]^+$ : 337.1199, found: 337.1212; IR (KBr,  $\text{cm}^{-1}$ ) 3029, 2922, 2852, 1755, 1452, 1143, 1103, 749, 699, 499.

#### 3-(naphthalen-1-yl)-4-phenylchroman-2-one (**3m**)

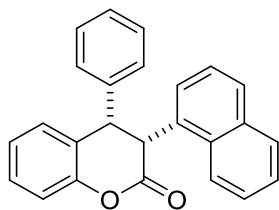

Starting from **2a** (40.0 mg, 0.20 mmol) and **1m** (134.0 mg, 0.4 mmol) according to the general procedure to provide **3m** in 93% yield (65.0 mg, >20:1 dr); White solid, mp 145-146 °C; <sup>1</sup>H NMR (400 MHz, CDCl<sub>3</sub>) δ 7.97 (d, *J* = 8.4Hz, 1H), 7.72 (d, *J* = 8.0Hz, 1H), 7.58 (d, *J* = 8.0Hz, 1H), 7.47 (t, *J* = 7.6Hz, 1H), 7.38 (t, *J* = 7.6Hz, 1H), 7.20 – 7.03 (m, 10H), 6.90 (t, *J* = 7.2Hz, 1H), 6.75 (d, *J* = 7.6Hz, 1H), 4.91 (d, *J* = 5.6Hz, 1H), 4.55 (d, *J* = 5.6Hz, 1H); <sup>13</sup>C NMR (125 MHz, CDCl<sub>3</sub>) δ 168.3, 151.1, 140.8, 134.1, 132.0, 130.7, 129.4, 129.3(1), 129.1, 128.9, 128.6, 127.5(2), 127.4(5), 126.6, 125.8, 125.3, 125.1, 125.0, 124.4, 122.9, 116.9, 49.9, 48.2; **HRMS (ESI, *m/z*)** calcd. for C<sub>25</sub>H<sub>18</sub>NaO<sub>2</sub> [M+Na]<sup>+</sup>: 373.1199, found: 373.1209; IR (KBr, cm<sup>-1</sup>) 3062, 3027, 2917, 2876, 1759, 1484, 1451, 1224, 755, 696.

### 3-phenyl-4-(*m*-tolyl)chroman-2-one (**3n**)

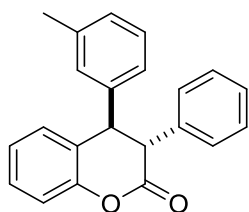

Starting from **2b** (42.8 mg, 0.20 mmol) and **1a** (114.0 mg, 0.4 mmol) according to the general procedure to provide **3n** in 74% yield (46.5 mg, 7:1 dr); White solid, mp 160-162 °C; <sup>1</sup>H NMR (400 MHz, CDCl<sub>3</sub>) δ 7.23 – 6.93 (m, 10H), 6.88 (d, *J* = 7.2 Hz, 1H), 6.82 – 6.78 (m, 2H), 4.40 (d, *J* = 6.8 Hz, 1H), 4.16 (d, *J* = 6.8 Hz, 1H), 2.19 (s, 3H); <sup>13</sup>C NMR (125 MHz, CDCl<sub>3</sub>) δ 168.4, 151.3, 140.2, 138.7, 136.0, 129.2, 128.8(8), 128.8(5), 128.7, 128.5, 128.2, 128.0, 127.6, 124.9, 124.8, 124.7, 116.8, 53.2, 48.3, 21.4; **HRMS (ESI, *m/z*)** calcd. for C<sub>22</sub>H<sub>18</sub>NaO<sub>2</sub> [M+Na]<sup>+</sup>: 337.1199, found: 337.1218; IR (KBr, cm<sup>-1</sup>) 3062, 2923, 1756, 1483, 1453, 1278, 1224, 1147, 1104, 769, 699.

### 4-(3-methoxyphenyl)-3-phenylchroman-2-one (**3o**)

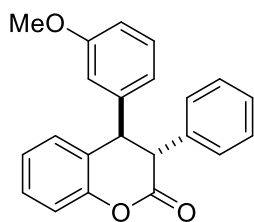

Starting from **2c** (46.0 mg, 0.20 mmol) and **1a** (114.0 mg, 0.4 mmol) according to the general procedure to provide **3o** in 60% yield (39.0 mg, 7:1 dr); White solid, mp 113–115 °C; <sup>1</sup>H NMR (400 MHz, CDCl<sub>3</sub>) δ 7.29 – 6.98 (m, 9H), 6.89 (d, *J* = 7.6 Hz, 1H), 6.68 – 6.66 (m, 1H), 6.61 (d, *J* = 7.6 Hz, 1H), 6.54 (s, 1H), 4.41 (d, *J* = 7.2 Hz, 1H), 4.15 (d, *J* = 7.2 Hz, 1H), 3.64 (s, 3H); <sup>13</sup>C NMR (125 MHz, CDCl<sub>3</sub>) δ 168.3, 159.9, 151.2, 141.7, 135.8, 130.0, 129.1, 129.0, 128.7, 128.0, 127.6, 124.8, 124.6, 120.2, 116.8, 114.0, 112.5, 55.2, 53.1, 48.3 **HRMS (ESI, *m/z*)** calcd. for C<sub>22</sub>H<sub>18</sub>NaO<sub>3</sub> [M+Na]<sup>+</sup>: 353.1148, found: 353.1165; IR (KBr, cm<sup>-1</sup>) 3032, 2922, 2840, 1758, 1483, 1454, 1224, 1144, 1102, 769, 698.

#### 4-(3-fluorophenyl)-3-phenylchroman-2-one (**3p**)

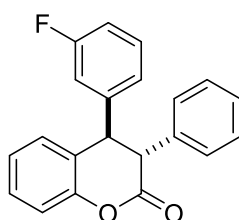

Starting from **2d** (43.6 mg, 0.20 mmol) and **1a** (114.0 mg, 0.4 mmol) according to the general procedure to provide **3p** in 60% yield (38.0 mg, 9:1 dr); White solid, mp 142–144 °C; <sup>1</sup>H NMR (400 MHz, CDCl<sub>3</sub>) δ 7.27 – 7.18 (m, 1H), 7.13 - 6.94 (m, 8H), 6.81 – 6.67 (m, 4H), 4.41 (d, *J* = 7.6 Hz, 1H), 4.08 (d, *J* = 7.6 Hz, 1H); <sup>13</sup>C NMR (125 MHz, CDCl<sub>3</sub>) δ 167.9, 162.9 (d, *J*<sub>C,F</sub> = 247.0 Hz), 151.1, 142.4 (d, *J*<sub>C,F</sub> = 6.8 Hz), 135.3, 130.5 (d, *J*<sub>C,F</sub> = 8.3 Hz), 129.1, 128.8, 128.7, 128.0, 127.7, 124.9, 124.2, 123.7 (d, *J*<sub>C,F</sub> = 2.7 Hz), 116.8, 114.9 (d, *J*<sub>C,F</sub> = 21.9 Hz), 114.4 (d, *J*<sub>C,F</sub> = 21.0 Hz), 52.9, 47.9; **HRMS (ESI, *m/z*)** calcd. for C<sub>21</sub>H<sub>15</sub>FNao<sub>2</sub> [M+Na]<sup>+</sup>: 341.0948, found: 341.0967; IR (KBr, cm<sup>-1</sup>) 3065, 1761, 1588, 1486, 1452, 1226, 1143, 1103, 743, 500.

#### 3-phenyl-4-(*p*-tolyl)chroman-2-one (**3q**)

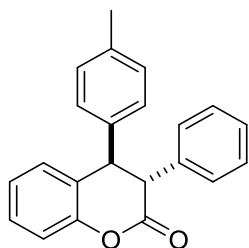

Starting from **2e** (42.8 mg, 0.20 mmol) and **1a** (114.0 mg, 0.4 mmol) according to the general procedure to provide **3q** in 73% yield (45.9 mg, 12:1 dr); White solid, mp 150-151 °C; <sup>1</sup>H NMR (400 MHz, CDCl<sub>3</sub>) δ 7.42 – 7.12 (m, 10H), 7.05 – 7.00 (m, 3H), 4.56 (d, *J* = 7.2 Hz, 1H), 4.29 (d, *J* = 7.2 Hz, 1H), 2.35 (s, 3H); <sup>13</sup>C NMR (125 MHz, CDCl<sub>3</sub>) δ 168.5, 151.2, 137.1, 137.0, 135.9, 129.6, 129.1, 128.8, 128.7, 128.1, 127.8, 127.6, 125.1, 124.8, 116.8, 53.3, 47.9, 21.0; **HRMS (ESI, *m/z*)** calcd. for C<sub>22</sub>H<sub>18</sub>NaO<sub>2</sub> [M+Na]<sup>+</sup>: 337.1199, found: 337.1222; IR (KBr, cm<sup>-1</sup>) 3065, 2921, 1753, 1454, 1240, 1211, 1197, 1148, 763, 500.

#### 4-(4-methoxyphenyl)-3-phenylchroman-2-one (**3r**)

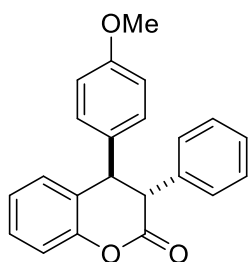

Starting from **2f** (46.0 mg, 0.20 mmol) and **1a** (114.0 mg, 0.4 mmol) according to the general procedure to provide **3r** in 63% yield (41.6 mg, 7:1 dr); White solid, mp 171-173 °C; <sup>1</sup>H NMR (400 MHz, CDCl<sub>3</sub>) δ 7.26 – 6.84 (m, 11H), 6.75 – 6.70 (m, 2H), 4.39 (d, *J* = 7.6 Hz, 1H), 4.11 (d, *J* = 7.6 Hz, 1H), 3.66 (s, 3H); <sup>13</sup>C NMR (125 MHz, CDCl<sub>3</sub>) δ 168.5, 158.8, 151.2, 135.9, 131.9, 129.0, 128.8, 128.7, 128.1, 127.9, 127.6, 125.3, 124.8, 116.8, 114.3, 55.2, 53.4, 47.5; **HRMS (ESI, *m/z*)** calcd. for C<sub>22</sub>H<sub>18</sub>NaO<sub>3</sub> [M+Na]<sup>+</sup>: 353.1148, found: 353.1161; IR (KBr, cm<sup>-1</sup>) 3065, 2921, 2840, 1756, 1512, 1452, 1244, 1225, 1143, 1102, 762, 500.

#### 4-(4-chlorophenyl)-3-phenylchroman-2-one (**3s**)

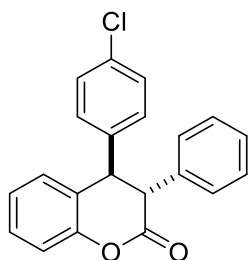

Starting from **2g** (46.9 mg, 0.20 mmol) and **1a** (114.0 mg, 0.4 mmol) according to the general procedure to provide **3s** in 63% yield (42.2 mg, 7:1 dr); White solid, mp 153-155 °C; <sup>1</sup>H NMR (400 MHz, CDCl<sub>3</sub>) δ 7.29 – 6.97 (m, 10H), 6.93 (d, *J* = 6.4 Hz, 2H), 6.70 (d, *J* = 7.6 Hz, 1H), 4.42 (d, *J* = 8.4 Hz, 1H), 4.07 (d, *J* = 8.4 Hz, 1H); <sup>13</sup>C NMR (125 MHz, CDCl<sub>3</sub>) δ 168.1, 151.2, 138.4, 135.4, 133.3, 129.4, 129.1(4), 129.1(1), 128.8, 128.7, 128.1, 127.7, 124.9, 124.5, 116.9, 53.1, 47.7; **HRMS (ESI, *m/z*)** calcd. for C<sub>21</sub>H<sub>15</sub>ClNaO<sub>2</sub> [M+Na]<sup>+</sup>: 357.0653, found: 357.0659; IR (KBr, cm<sup>-1</sup>) 3030, 2922, 2851, 1751, 1484, 1452, 1222, 1144, 1087, 757, 698.

### 3-phenyl-4-(*o*-tolyl)chroman-2-one (**3t**)

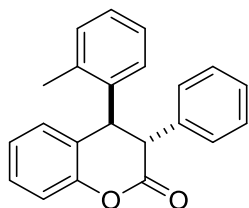

Starting from **2h** (42.8 mg, 0.20 mmol) and **1a** (114.0 mg, 0.4 mmol) according to the general procedure to provide **3t** in 70% yield (44.0 mg, 9:1 dr); White solid, mp 129-131 °C; <sup>1</sup>H NMR (400 MHz, CDCl<sub>3</sub>) δ 7.23 (t, *J* = 7.6 Hz, 1H), 7.16 – 6.96 (m, 10H), 6.82 – 6.79 (m, 1H), 6.76 (d, *J* = 7.6 Hz, 1H), 4.71 (d, *J* = 7.2 Hz, 1H), 4.10 (d, *J* = 7.2 Hz, 1H), 2.24 (s, 3H); <sup>13</sup>C NMR (125 MHz, CDCl<sub>3</sub>) δ 168.4, 151.6, 138.0, 135.9, 135.8, 130.8, 129.0, 128.9, 128.7, 128.0, 127.7, 127.4, 127.3, 126.7, 125.0, 124.9, 116.7, 52.3, 44.0, 19.6; **HRMS (ESI, *m/z*)** calcd. for C<sub>22</sub>H<sub>18</sub>NaO<sub>2</sub> [M+Na]<sup>+</sup>: 337.1199, found: 337.1224; IR (KBr, cm<sup>-1</sup>) 3026, 2922, 2852, 1760, 1485, 1451, 1225, 1146, 1101, 755, 699, 499.

### 6-methyl-3,4-diphenylchroman-2-one (**3u**)

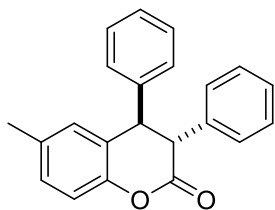

Starting from **2i** (42.8 mg, 0.20 mmol) and **1a** (114.0 mg, 0.4 mmol) according to the general procedure to provide **3u** in 70% yield (44.0 mg, 7:1 dr); White solid, mp 151-153 °C; <sup>1</sup>H NMR (400 MHz, CDCl<sub>3</sub>) δ 7.20 – 6.96 (m, 12H), 6.67 (s, 1H), 4.37 (d, *J* = 6.4 Hz, 1H), 4.12 (d, *J* = 6.4 Hz, 1H), 2.14 (s, 3H); <sup>13</sup>C NMR (125 MHz, CDCl<sub>3</sub>) δ 168.5, 149.2, 140.4, 136.0, 134.5, 129.5, 129.4, 129.0, 128.7, 128.0, 127.9, 127.6, 127.4, 124.2, 116.6, 53.4, 48.5, 20.7; **HRMS (ESI, *m/z*)** calcd. for C<sub>22</sub>H<sub>18</sub>NaO<sub>2</sub> [M+Na]<sup>+</sup>: 337.1199, found: 337.1218; IR (KBr, cm<sup>-1</sup>) 3030, 2921, 2851, 1753, 1494, 1163, 1143, 1124, 816, 532.

#### 6-methoxy-3,4-diphenylchroman-2-one (**3v**)

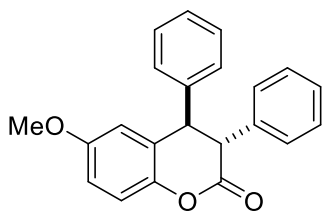

Starting from **2j** (46.0 mg, 0.20 mmol) and **1a** (114.0 mg, 0.4 mmol) according to the general procedure to provide **3w** in 78% yield (51.5 mg, 7:1 dr); White solid, mp 190-192 °C; <sup>1</sup>H NMR (400 MHz, CDCl<sub>3</sub>) δ 7.20 – 7.00 (m, 11H), 6.80 – 6.66 (m, 1H), 6.39 (s, 1H), 4.38 (d, *J* = 6.8 Hz, 1H), 4.12 (d, *J* = 6.8 Hz, 1H), 3.59 (s, 3H); <sup>13</sup>C NMR (125 MHz, CDCl<sub>3</sub>) δ 168.4, 156.4, 145.2, 140.0, 136.0, 129.0, 128.7, 128.0, 127.9, 127.6, 127.5, 125.6, 117.6, 114.1, 114.0, 55.5, 53.2, 48.6; **HRMS (ESI, *m/z*)** calcd. for C<sub>22</sub>H<sub>18</sub>NaO<sub>3</sub> [M+Na]<sup>+</sup>: 353.1148, found: 353.1164; IR (KBr, cm<sup>-1</sup>) 3065, 2922, 2851, 1749, 1492, 1453, 1204, 1147, 1025, 754, 499.

#### 6-bromo-3,4-diphenylchroman-2-one (**3w**)

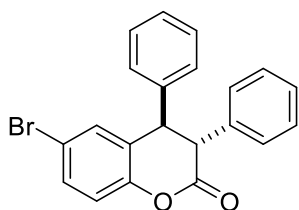

Starting from **2k** (55.8 mg, 0.20 mmol) and **1a** (114.0 mg, 0.4 mmol) according to the general procedure to provide **3w** in 63% yield (47.8 mg, 6:1 dr); White solid, (diastereomers could be isolated), mp 171-172 °C; <sup>1</sup>H NMR (400 MHz, CDCl<sub>3</sub>) δ 7.33 (d, *J* = 8.8z, 1H), 7.21 – 7.13 (m, 6), 7.03 – 6.95 (m, 6H), 4.40 (d, *J* = 7.2 Hz, 1H), 4.12 (d, *J* = 7.2Hz, 1H); <sup>13</sup>C NMR (125 MHz, CDCl<sub>3</sub>) δ 167.6, 150.3, 139.2, 135.3 132.0, 131.7, 129.1, 128.8, 127.9, 127.8(1), 127.7(7), 127.0, 118.6, 117.4, 52.81, 48.2; **HRMS (ESI, *m/z*)** calcd. for C<sub>21</sub>H<sub>15</sub>BrNaO<sub>2</sub> [M+Na]<sup>+</sup>: 401.0148, found: 401.0147; IR (KBr, cm<sup>-1</sup>) 3063, 2921, 2850, 1764, 1480, 1212, 1151, 1121, 895, 701, 528.

#### 4-(naphthalen-1-yl)-3-phenylchroman-2-one (**3x**)

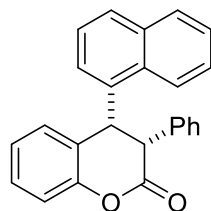

Starting from **2l** (50.0 mg, 0.20 mmol) and **1a** (114.0 mg, 0.4 mmol) according to the general procedure to provide **3x** in 45% yield (31.6 mg, > 20:1dr); yellow oil; <sup>1</sup>H NMR (500 MHz, CDCl<sub>3</sub>) δ 8.05 (d, *J* = 8.5 Hz, 1H), 7.91 (d, *J* = 8.0 Hz, 1H), 7.75 (d, *J* = 8.0 Hz, 1H), 7.58 (t, *J* = 7.5 Hz, 1H), 7.53 (t, *J* = 7.0 Hz, 1H), 7.37 (t, *J* = 8.0 Hz, 1H), 7.30 (t, *J* = 7.5 Hz, 1H), 7.27 – 7.22 (m, 6H), 7.11 (t, *J* = 7.5 Hz, 1H), 7.04 (d, *J* = 7.5 Hz, 1H), 6.92 (d, *J* = 7.0 Hz, 1H), 5.36 (d, *J* = 4.0 Hz, 1H), 4.47 (d, *J* = 4.0 Hz, 1H); <sup>13</sup>C NMR (125 MHz, CDCl<sub>3</sub>) δ 167.8, 152.0, 136.1, 135.9, 134.3, 130.7, 129.5, 129.2, 129.0, 128.4, 127.9, 127.6, 126.8, 125.9, 125.8, 125.6, 125.3, 123.9, 122.4, 116.9, 52.4, 44.0; **HRMS (ESI, *m/z*)** calcd. for C<sub>25</sub>H<sub>19</sub>O<sub>2</sub> [M+H]<sup>+</sup>: 351.1380, found: 351.1370; IR (KBr, cm<sup>-1</sup>) 3053, 2920, 2851, 1762, 1481, 1212, 1150, 1120, 893, 701, 526.

#### 4-methyl-3-phenylchroman-2-one (**3y**)

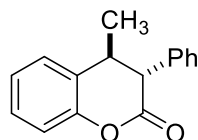

Starting from **2m** (27.6 mg, 0.20 mmol) and **1a** (114.0 mg, 0.4 mmol) according to the general procedure to provide **3y** in 53% yield (25.2 mg, 6:1dr); yellow oil; <sup>1</sup>H NMR (500 MHz, CDCl<sub>3</sub>) δ 7.24 – 7.14 (m, 5H), 7.10 – 7.02 (m, 3H), 6.99 (d, *J* = 8.0 Hz, 1H),



3.65 (d,  $J = 7.5$  Hz, 1H), 3.27 (p,  $J = 7.0$  Hz, 1H), 1.21 (d,  $J = 7.0$  Hz, 3H);  $^{13}\text{C}$  NMR (125 MHz,  $\text{CDCl}_3$ )  $\delta$  169.0, 150.7, 136.0, 128.8, 128.4, 128.0, 127.7, 127.0, 126.9, 124.7, 116.7, 52.7, 36.0, 19.4; **HRMS (ESI,  $m/z$ )** calcd. for  $\text{C}_{16}\text{H}_{14}\text{NaO}_2$   $[\text{M}+\text{Na}]^+$ : 261.0886, found: 261.0878; IR (KBr,  $\text{cm}^{-1}$ ) 3050, 2923, 2850, 1763, 1485, 1210, 1157, 1121, 893, 701, 529.

#### 4-methyl-3-(naphthalen-1-yl)chroman-2-one (**3z**)

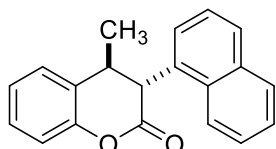

Starting from **2m** (27.6 mg, 0.20 mmol) and **1m** (142.0 mg, 0.4 mmol) according to the general procedure to provide **3z** in 60% yield (34.6 mg, 11:1dr); yellow oil;  $^1\text{H}$  NMR (500 MHz,  $\text{CDCl}_3$ )  $\delta$  7.96 (d,  $J = 8.5$  Hz, 1H), 7.87 (d,  $J = 8.0$  Hz, 1H), 7.76 (d,  $J = 8.0$  Hz, 1H), 7.57 – 7.54 (m, 1H), 7.52 – 7.49 (m, 1H), 7.33 – 7.28 (m, 2H), 7.18 (d,  $J = 8.0$  Hz, 2H), 7.11 – 7.07 (m, 2H), 4.58 (d,  $J = 6.0$  Hz, 1H), 3.53 (p,  $J = 7.0$  Hz, 1H), 1.39 (d,  $J = 7.0$  Hz, 3H);  $^{13}\text{C}$  NMR (125 MHz,  $\text{CDCl}_3$ )  $\delta$  169.0, 150.7, 134.2, 132.4, 131.1, 129.3, 128.5(2), 128.4(8), 127.4, 126.8, 126.6, 125.8, 125.2(9), 125.2(6), 124.9, 122.9, 116.9, 49.6, 36.7, 20.2; **HRMS (ESI,  $m/z$ )** calcd. for  $\text{C}_{20}\text{H}_{17}\text{O}_2$   $[\text{M}+\text{H}]^+$ : 289.1223, found: 289.1222; IR (KBr,  $\text{cm}^{-1}$ ) 3057, 2922, 2855, 1767, 1481, 1212, 1150, 1122, 895, 705, 528.

#### *N*-(3,4-diphenyl-4*H*-chromen-2-yl)-*N*,4-dimethylbenzenesulfonamide (**3aa**)

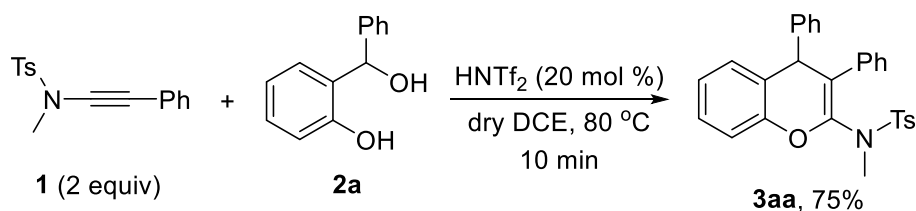

HNTf<sub>2</sub> (0.04 mmol, 11.2 mg) was added to a mixture of the ynamide **1a** (0.40 mmol), *o*-hydroxybenzyl alcohols **2a** in dry DCE (4.0 mL) with N<sub>2</sub> at room temperature. Then, the reaction mixture was stirred at 80 °C for 10 min. Upon completion, the mixture was concentrated and the residue was purified by chromatography on silica gel (eluent: hexanes/ethyl acetate) to afford compound **3aa** in 75% yield (70.0 mg). White solid,

mp 160-161 °C;  $^1\text{H}$  NMR (400 MHz,  $\text{CDCl}_3$ )  $\delta$  7.60 (d,  $J = 7.6$  Hz, 2H), 7.30 – 7.00 (m, 13H), 6.97 (d,  $J = 7.6$  Hz, 1H), 6.89 (t,  $J = 7.6$  Hz, 1H), 6.77 (d,  $J = 8.4$  Hz, 1H), 4.77 (s, 1H), 2.82 (s, 3H), 2.35 (s, 3H);  $^{13}\text{C}$  NMR (125 MHz,  $\text{CDCl}_3$ )  $\delta$  150.3, 144.7, 143.6, 142.2, 136.9, 136.1, 129.3, 128.9, 128.7, 128.6, 128.2, 128.0(6), 127.9(9), 127.5, 127.1, 126.8, 124.5, 124.2, 116.0, 115.0, 48.4, 36.4, 21.5; **HRMS (ESI,  $m/z$ )** calcd. for  $\text{C}_{29}\text{H}_{25}\text{NNaO}_3\text{S}$  [ $\text{M}+\text{Na}$ ] $^+$ : 490.1447, found: 490.1453; IR (KBr,  $\text{cm}^{-1}$ ) 3032, 2921, 1686, 1454, 1349, 1151, 754, 697, 673, 545.

### *N*-methyl-2-phenyl-*N*-tosylacetamide (**3ab**)

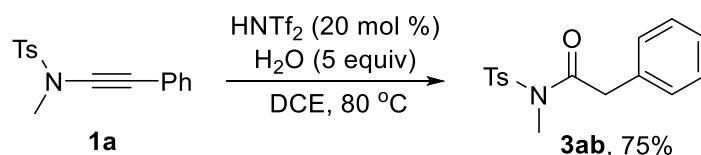

Compound **3ab** was prepared in 75% yield (45.5 mg) according to the above known procedure (0.2 mmol scale).<sup>1c</sup>  $^1\text{H}$  NMR (400 MHz,  $\text{CDCl}_3$ )  $\delta$  7.62 (d,  $J = 6.8$  Hz, 2H), 7.24 – 7.17 (m, 5H), 7.05 (d,  $J = 7.5$  Hz, 2H), 3.96 (s, 2H), 3.20 (s, 3H), 2.36 (s, 3H);  $^{13}\text{C}$  NMR (125 MHz,  $\text{CDCl}_3$ )  $\delta$  171.2, 144.9, 135.9, 133.4, 129.8, 129.3, 128.5, 127.5, 127.1, 43.0, 33.2, 21.6.

### 3,4-diphenyl-2*H*-chromen-2-one (**4a**)

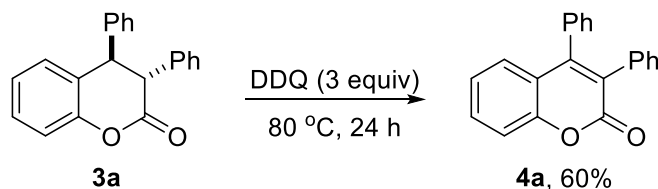

Compound **4a** was prepared in 60% yield (35.9 mg) according to the known procedures (0.2 mmol scale).<sup>2</sup> White solid, mp 233-237 °C;  $^1\text{H}$  NMR (400 MHz,  $\text{CDCl}_3$ )  $\delta$  7.44 (t,  $J = 7.0$  Hz, 1H), 7.34 (d,  $J = 8.1$  Hz, 1H), 7.22 – 7.21 (m, 3H), 7.16 – 7.03 (m, 9H);  $^{13}\text{C}$  NMR (125 MHz,  $\text{CDCl}_3$ )  $\delta$  161.2, 153.1, 151.5, 134.4, 133.8, 131.4, 130.5, 129.3, 128.3, 128.2, 127.7(2), 127.6(7), 127.6, 126.9, 124.2, 120.4, 116.7; **HRMS (ESI,  $m/z$ )** calcd. for  $\text{C}_{21}\text{H}_{14}\text{NaO}_2$  [ $\text{M}+\text{Na}$ ] $^+$ : 321.0886, found: 321.0898; IR (KBr,  $\text{cm}^{-1}$ ) 3027, 1708, 1684, 1595, 1444, 1357, 1296, 1132, 985, 769, 499.

### 3,4-diphenylchromane (**4b**)

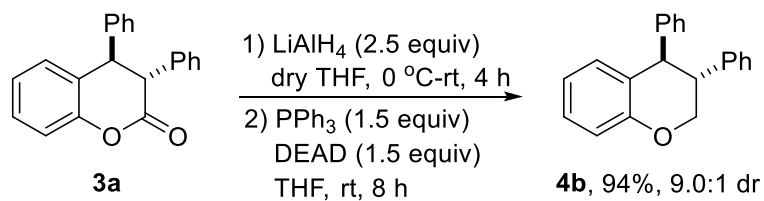

Compound **4b** was prepared in 94% yield (53.8 mg, 9:1 dr) according to the known procedures (0.2 mmol scale).<sup>3</sup> Pale yellow oil; <sup>1</sup>H NMR (400 MHz, CDCl<sub>3</sub>) δ 7.14 – 7.00 (m, 7H), 6.98 – 6.95 (m, 2H), 6.91 – 6.83 (m, 3H), 6.69 (d, *J* = 4.4 Hz, 2H), 4.28 – 4.12 (m, 3H), 3.22 (td, *J* = 9.6, 3.6 Hz, 1H); <sup>13</sup>C NMR (125 MHz, CDCl<sub>3</sub>) δ 154.8, 143.7, 140.2, 130.7, 129.0, 128.5, 128.2, 127.8, 127.7, 126.9, 126.5, 125.6, 120.6, 116.6, 69.6, 49.0, 47.6; **HRMS (ESI, *m/z*)** calcd. for C<sub>21</sub>H<sub>19</sub>O [M+H]<sup>+</sup>: 287.1430, found: 287.1436; IR (KBr, cm<sup>-1</sup>) 3063, 2917, 1484, 1450, 1225, 1042, 1013, 755, 500.

## Reference:

1. a) Bu, H.-Z.; Li, H.-H.; Luo, W.-F.; Luo, C.; Qian, P.-C.; Ye, L.-W. *Org. Lett.* **2020**, *22*, 648; b) Tu, Y.; Zeng, X.; Wang, H.; Zhao, J. *Org. Lett.* **2018**, *20*, 280; c) Jadhav, P. D.; Lu, X.; Liu, R.-S. *ACS Catal.* **2018**, *8*, 9697.
2. Li, L.; Chen, X.-M.; Wang, Z.-S.; Zhou, B.; Liu, X.; Lu, X.; Ye, L.-W. *ACS Catal.* **2017**, *7*, 4004.
3. Chen, X.; Song, R.; Liu, Y.; Ooi, C. Y.; Jin, Z.; Zhu, T.; Wang, H.; Hao, L.; Chi, Y. R. *Org. Lett.* **2017**, *19*, 5892.
4. (a) X.-Q. Zhu, Z.-S. Wang, B.-S. Hou, H.-W. Zhang, C. Deng and L.-W. Ye, *Angew. Chem., Int. Ed.*, 2020, **59**, 1666; (b) Z.-S. Wang, Y.-B. Chen, H.-W. Zhang, Z. Sun, C. Zhu and L.-W. Ye, *J. Am. Chem. Soc.*, 2020, **142**, 3636; (c) Y. Tokimizu, S. Oishi, N. Fujii and H. Ohno, *Org. Lett.*, **2014**, *16*, 3138; (d) S. Dutta, S. Yang, R. Vanjari, R. K. Mallick, V. Gandon and A. K. Sahoo, *Angew. Chem., Int. Ed.*, 2020, **59**, 10785; (e) L. Zeng, Y. Lin, J. Li, H. Sajiki, H. Xie and S. Cui, *Nat. Commun.*, 2020, **11**, 5639; (f) M. Chen, N. Sun, H. Chen and Y. Liu, *Chem. Commun.*, **2016**, 52, 6324.

### 3,4-diphenylchroman-2-one (3a)

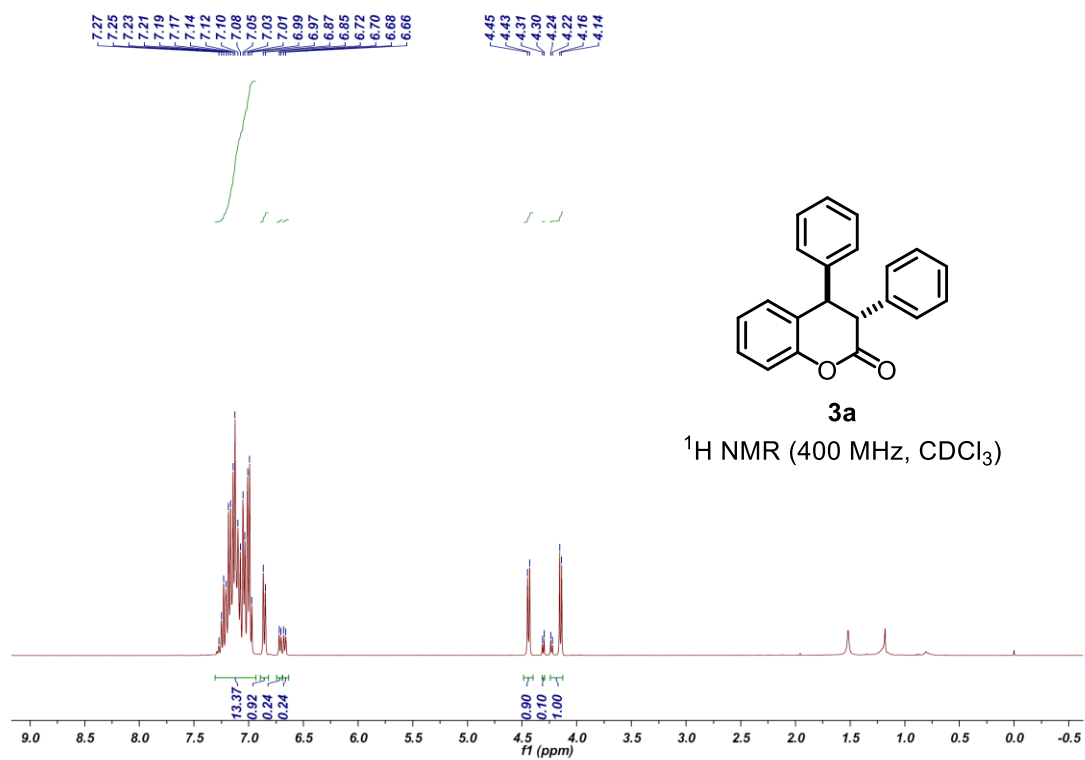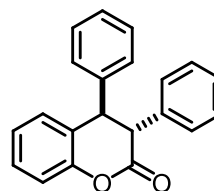

**3a**

<sup>1</sup>H NMR (400 MHz, CDCl<sub>3</sub>)

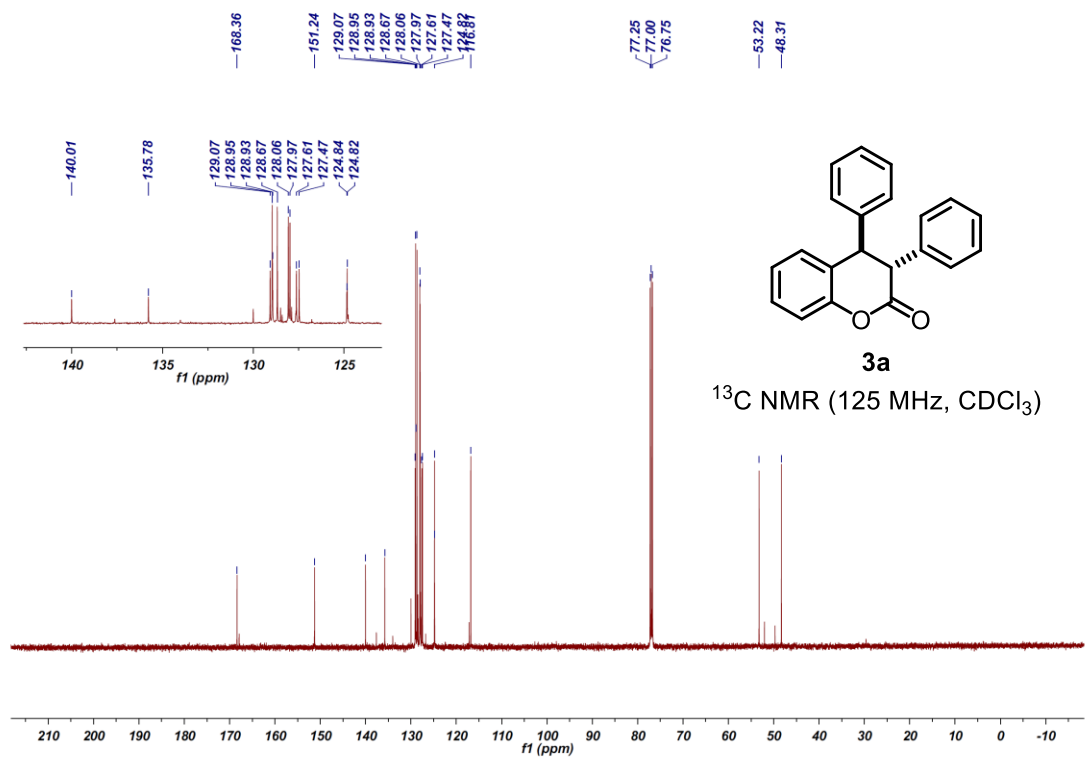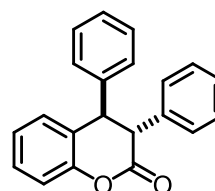

**3a**

<sup>13</sup>C NMR (125 MHz, CDCl<sub>3</sub>)

### 4-phenyl-3-(*p*-tolyl)chroman-2-one (3b)

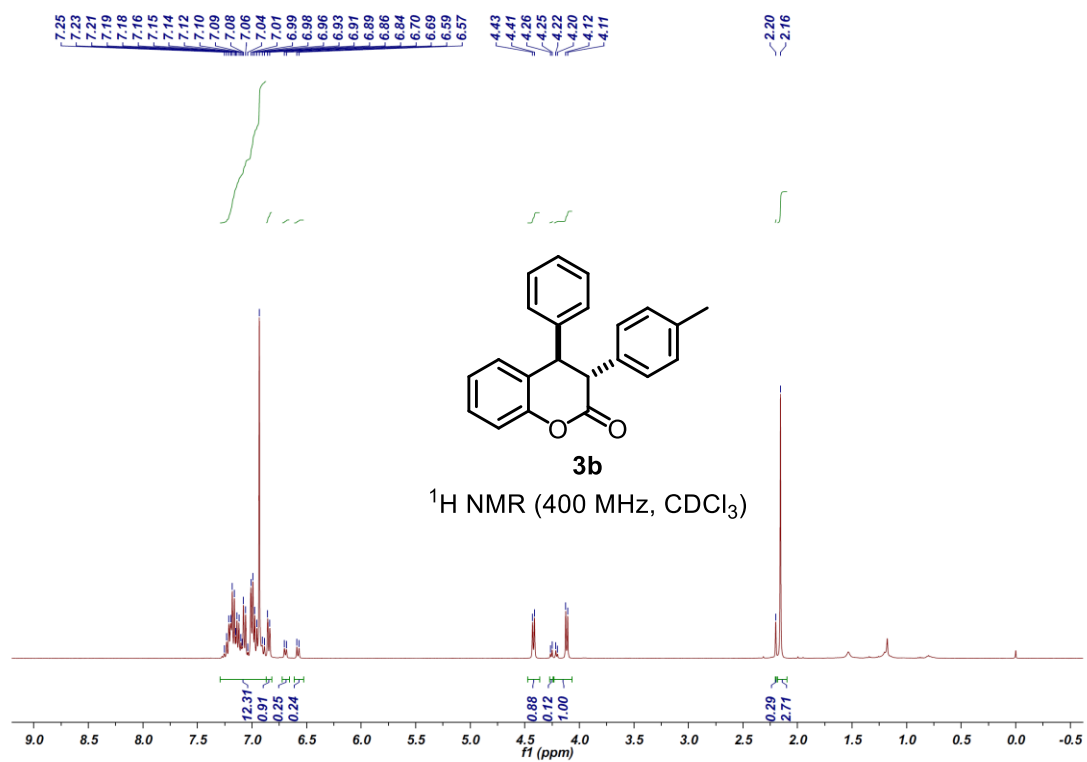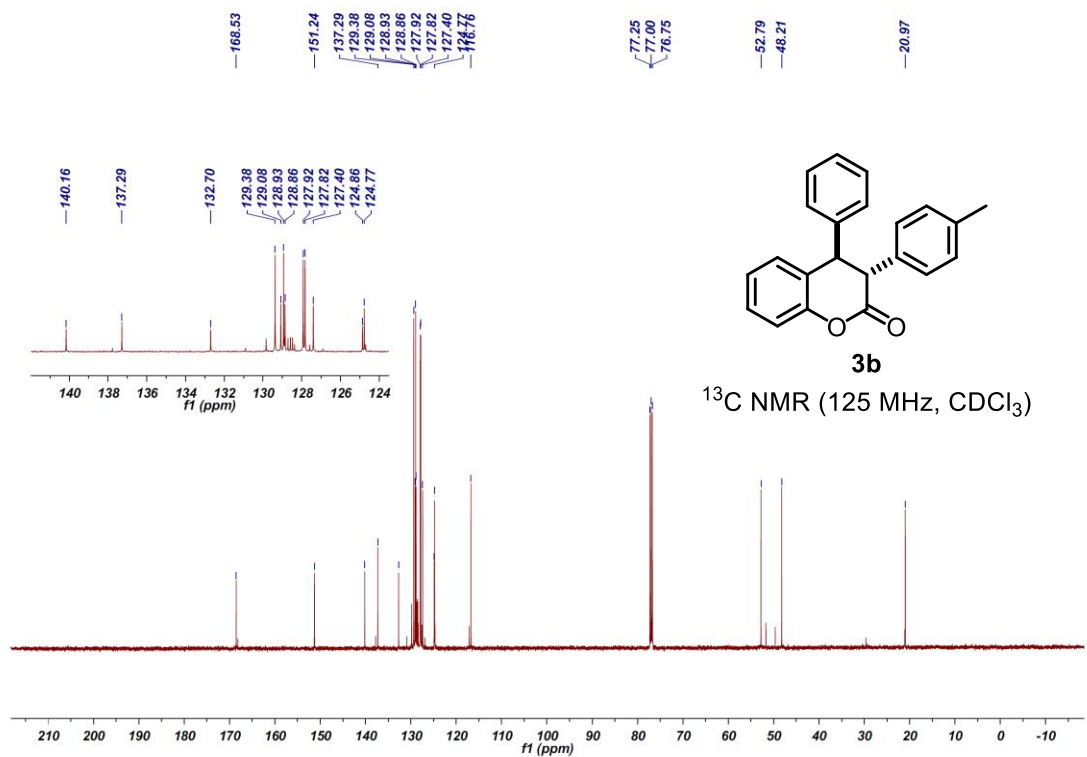

### 3-(4-methoxyphenyl)-4-phenylchroman-2-one (3c)

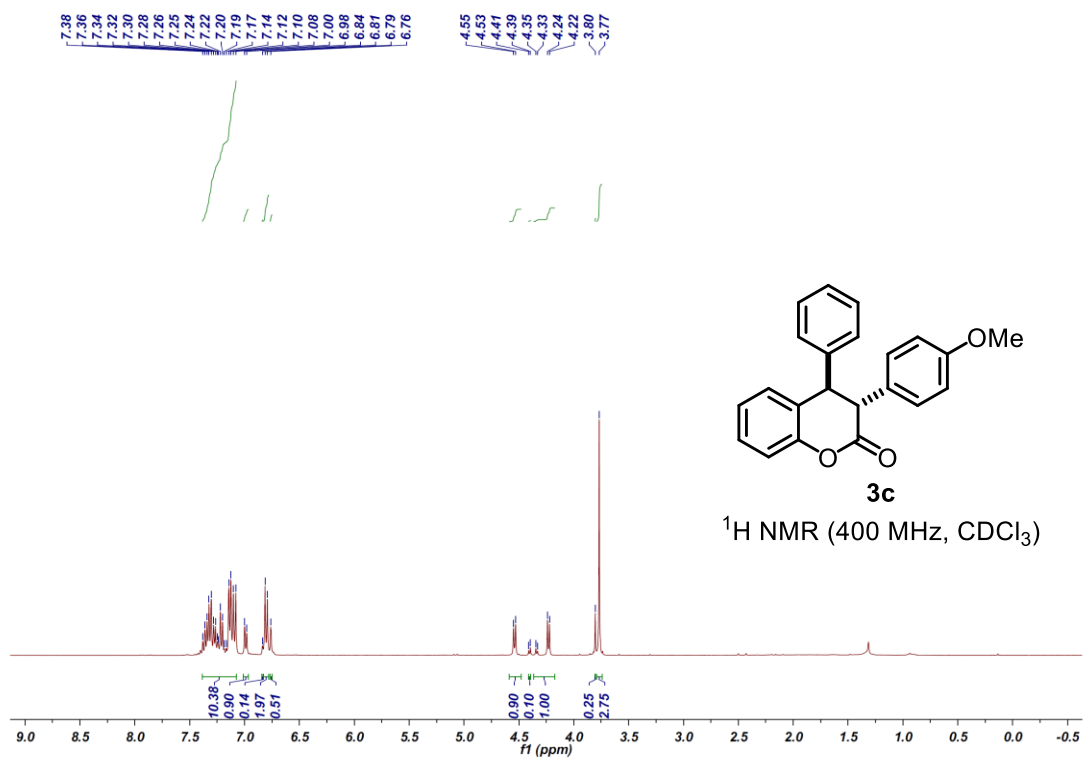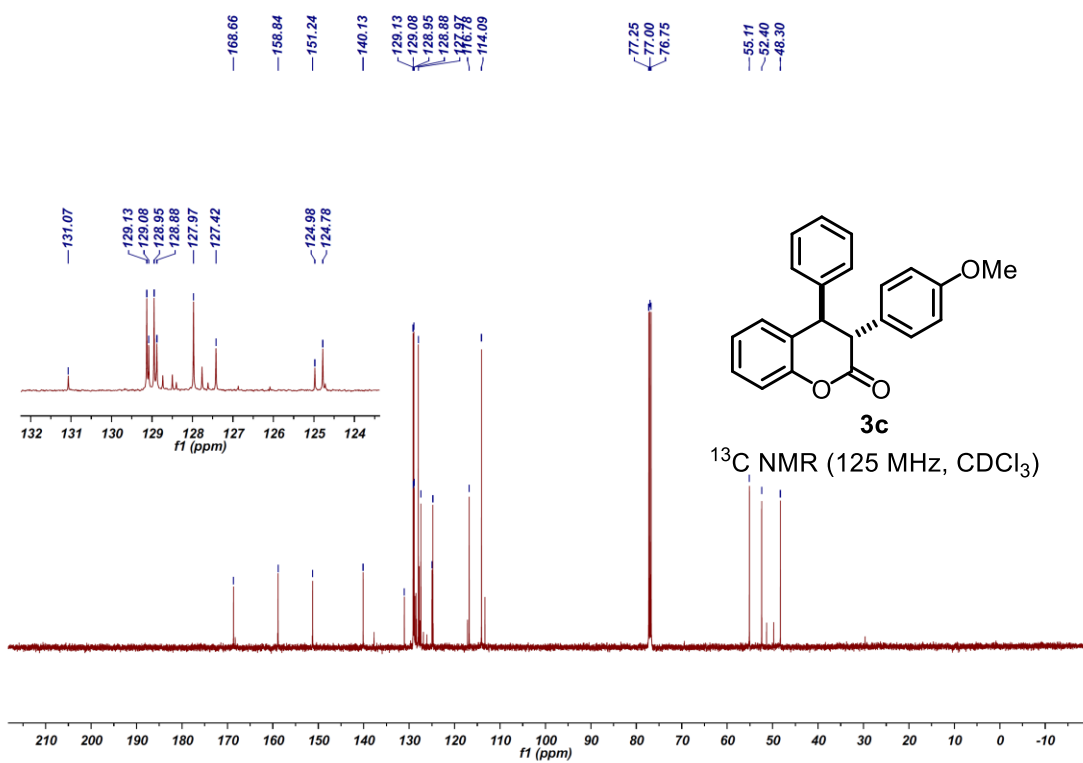

### 3-(4-fluorophenyl)-4-phenylchroman-2-one (3d)

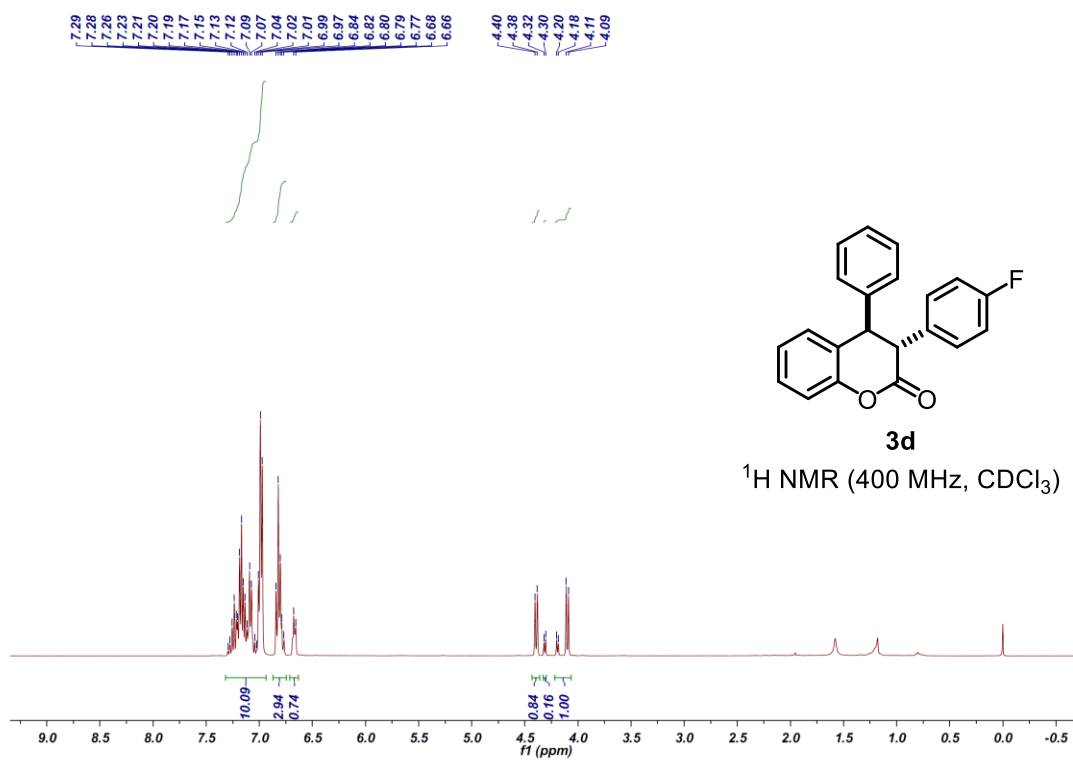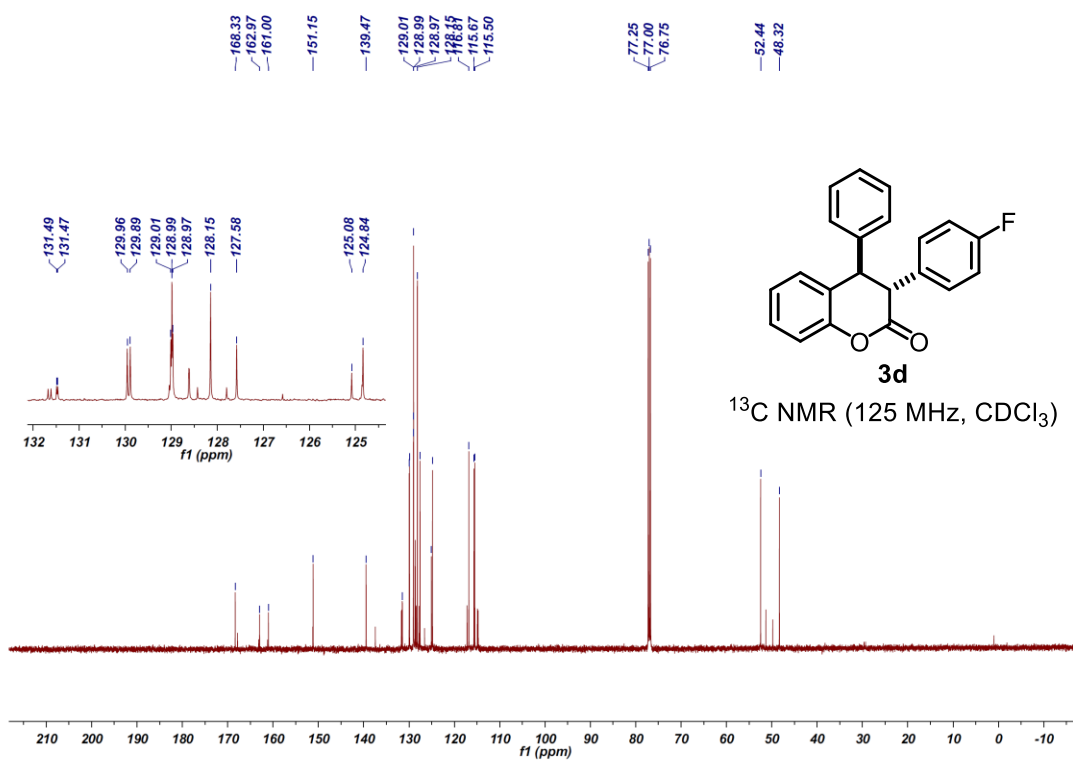



### 3-(4-chlorophenyl)-4-phenylchroman-2-one (3e)

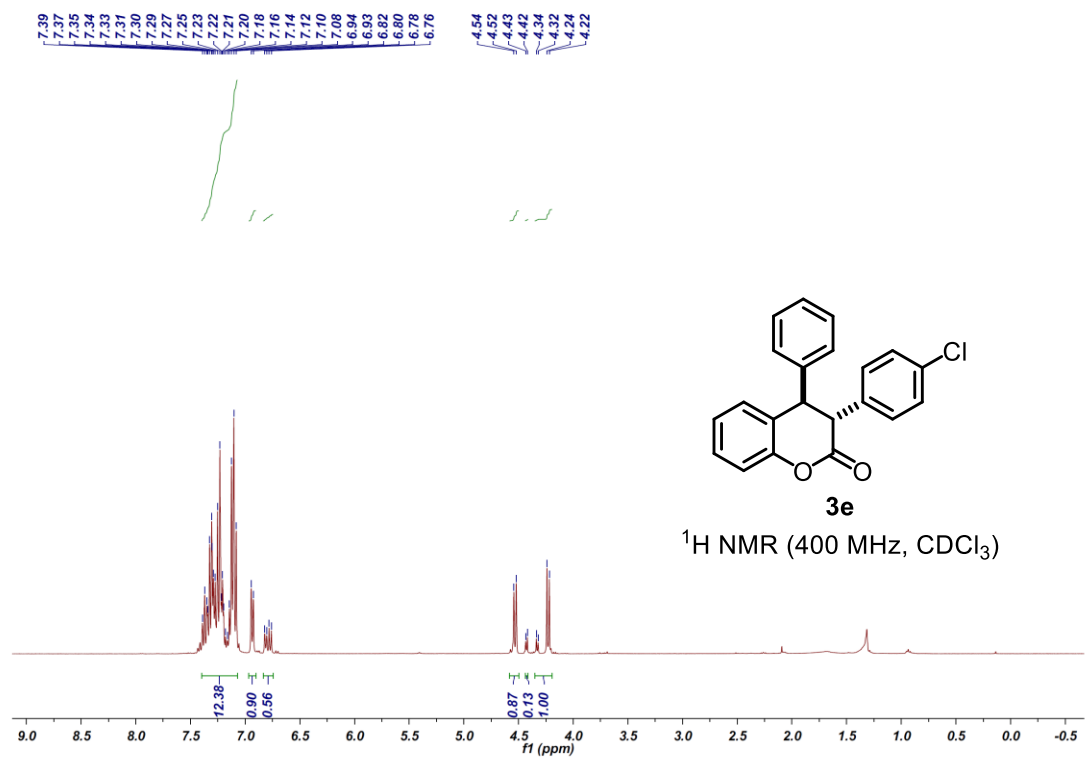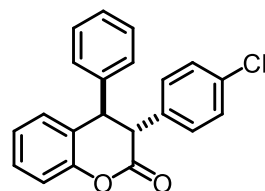

**3e**  
<sup>1</sup>H NMR (400 MHz, CDCl<sub>3</sub>)

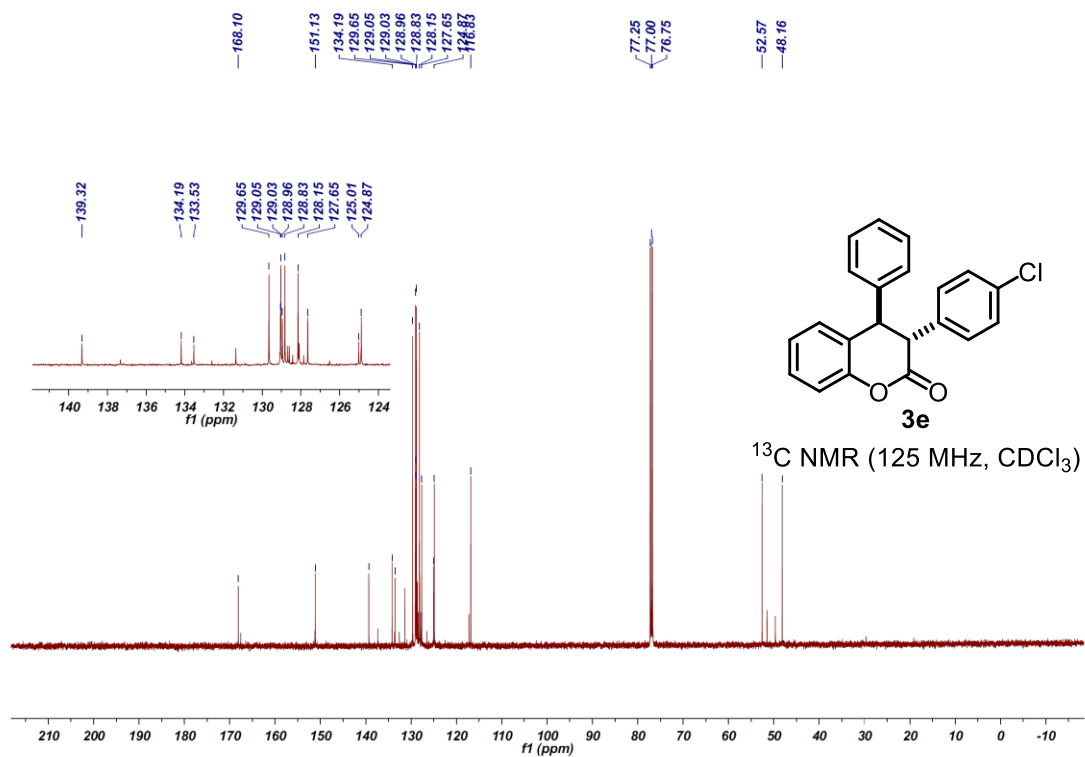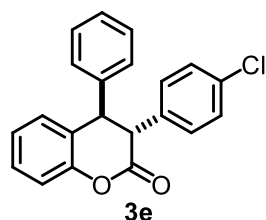

**3e**  
<sup>13</sup>C NMR (125 MHz, CDCl<sub>3</sub>)

### 3-(4-bromophenyl)-4-phenylchroman-2-one (3f)

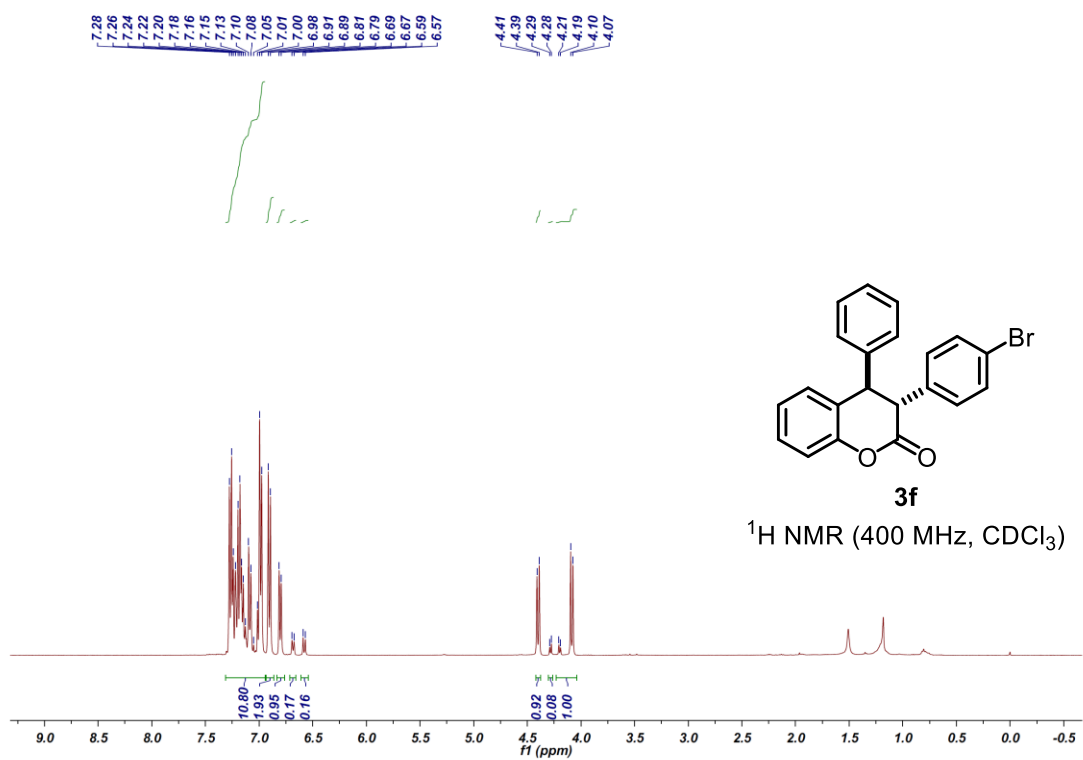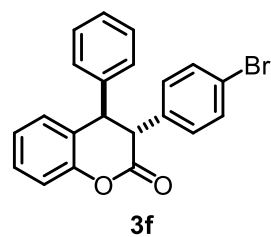

<sup>1</sup>H NMR (400 MHz, CDCl<sub>3</sub>)

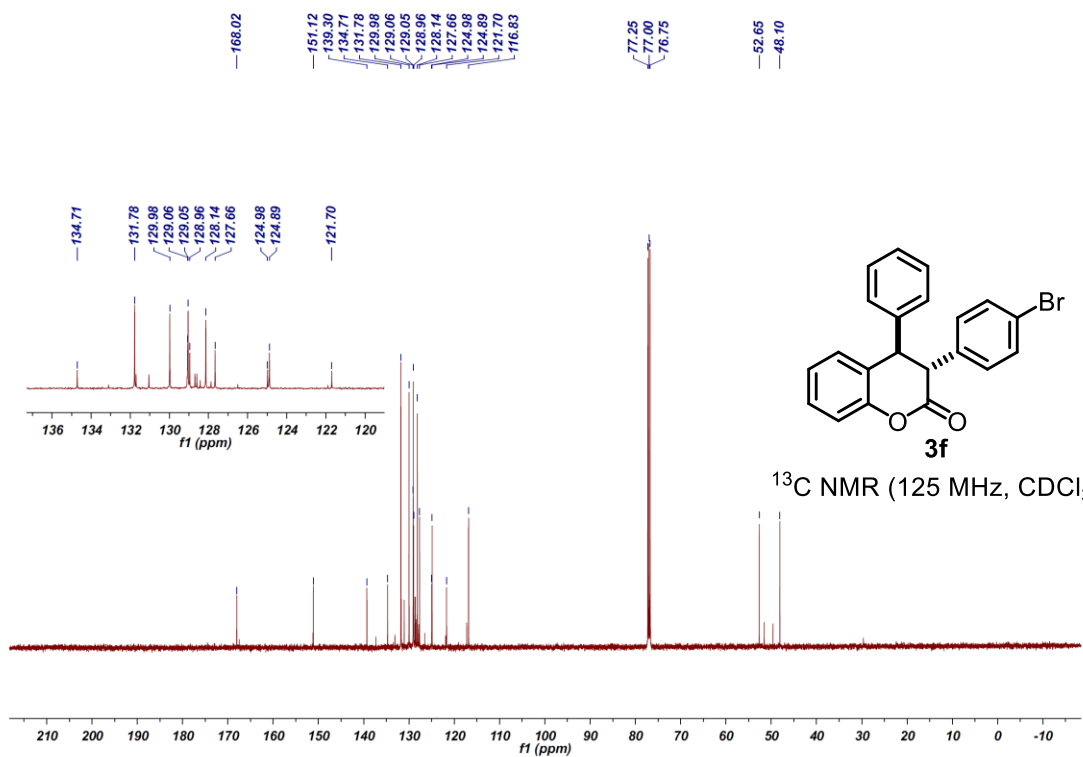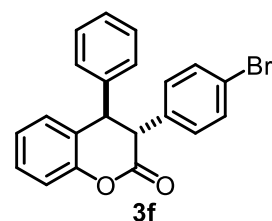

<sup>13</sup>C NMR (125 MHz, CDCl<sub>3</sub>)

# 4-phenyl-3-(*m*-tolyl)chroman-2-one (3g)

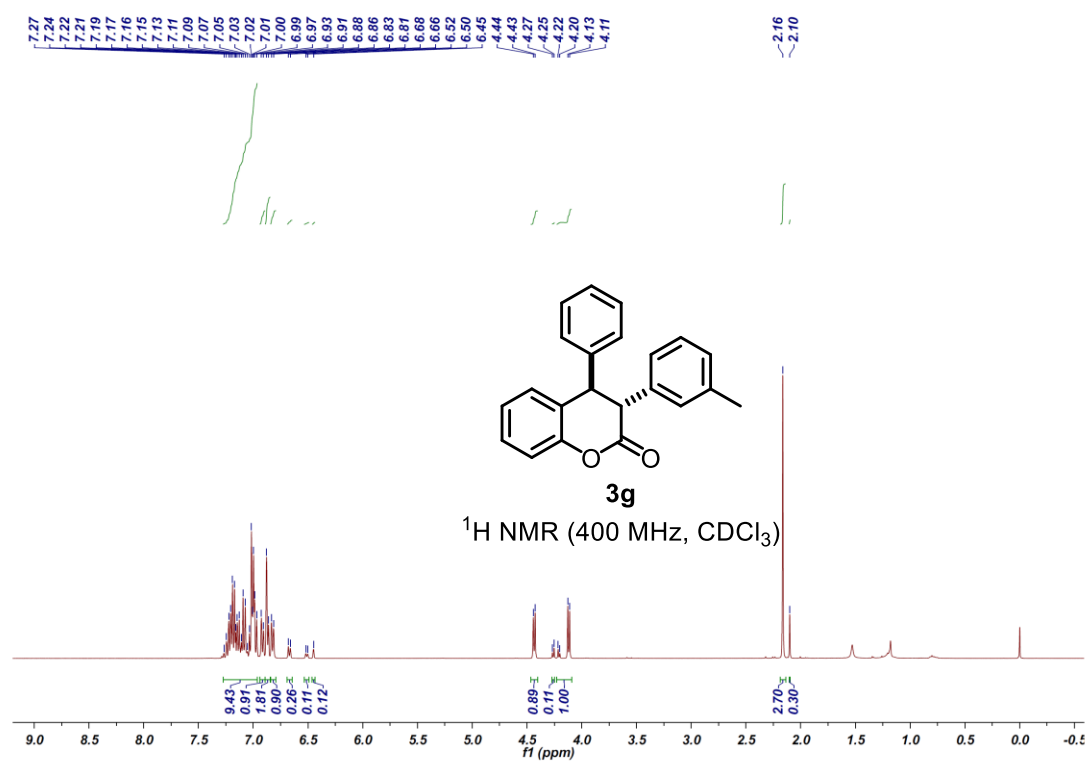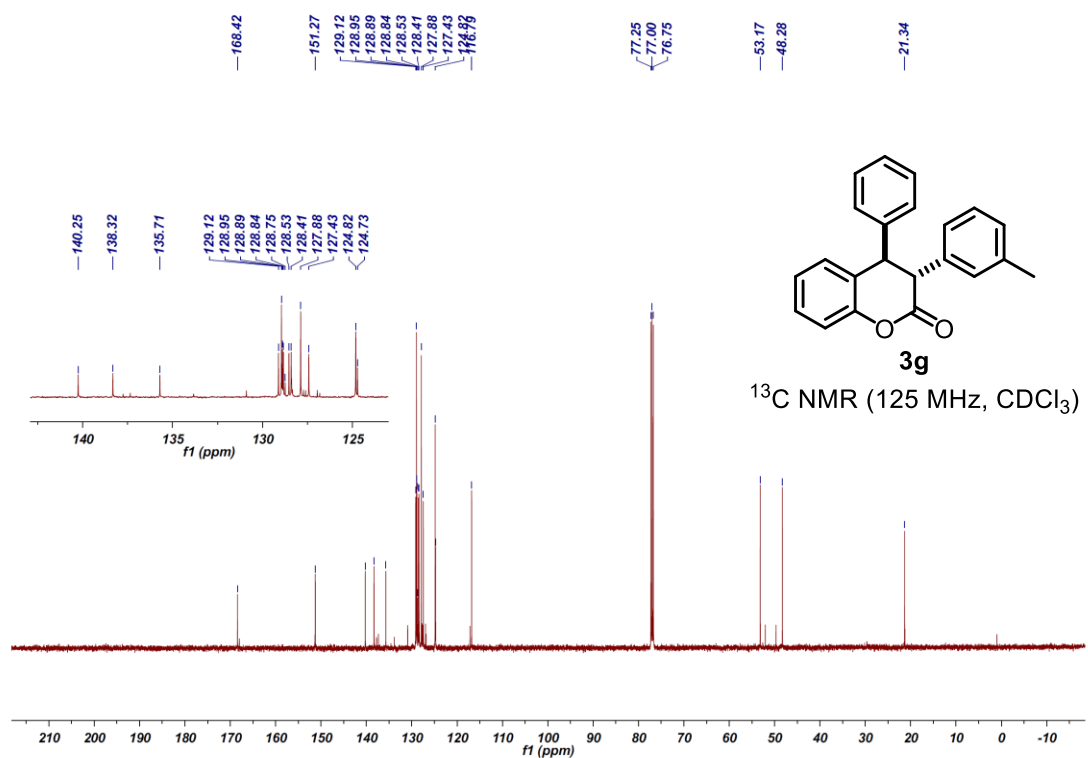

### 3-(3-methoxyphenyl)-4-phenylchroman-2-one (3h)

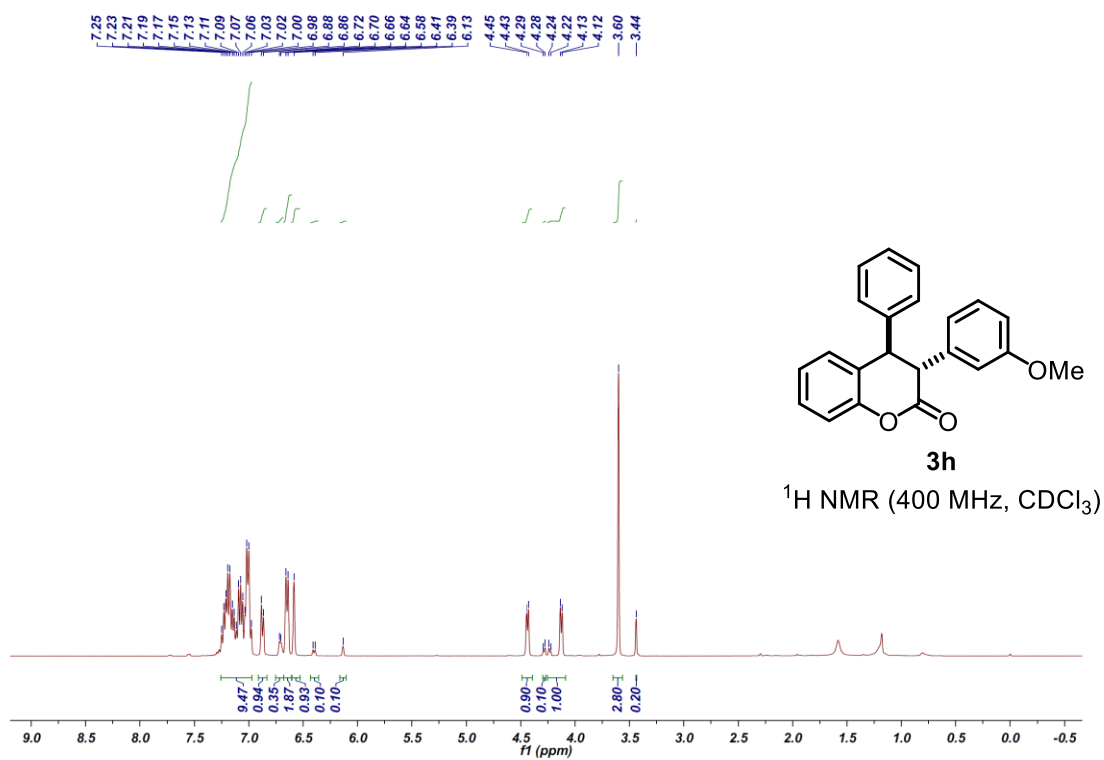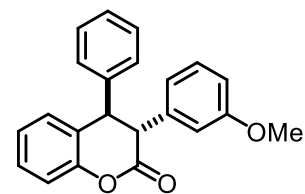

**3h**  
<sup>1</sup>H NMR (400 MHz, CDCl<sub>3</sub>)

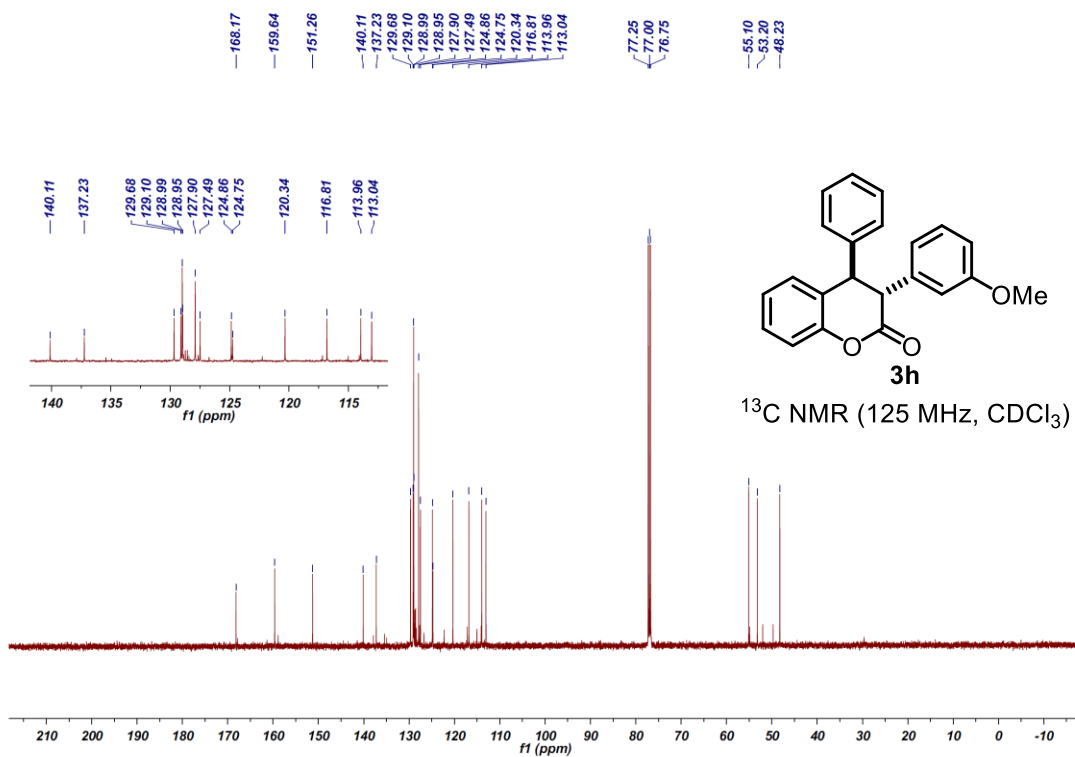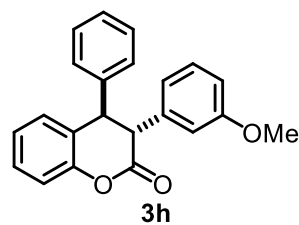

**3h**  
<sup>13</sup>C NMR (125 MHz, CDCl<sub>3</sub>)

### 3-(3-fluorophenyl)-4-phenylchroman-2-one (3i)

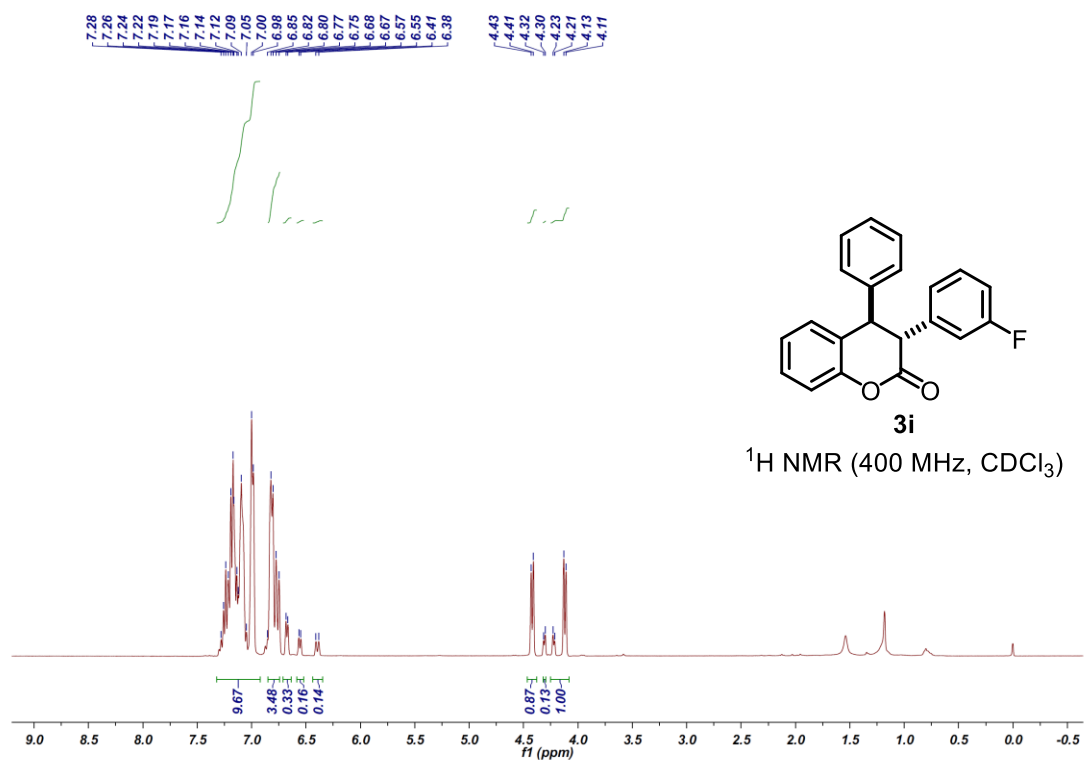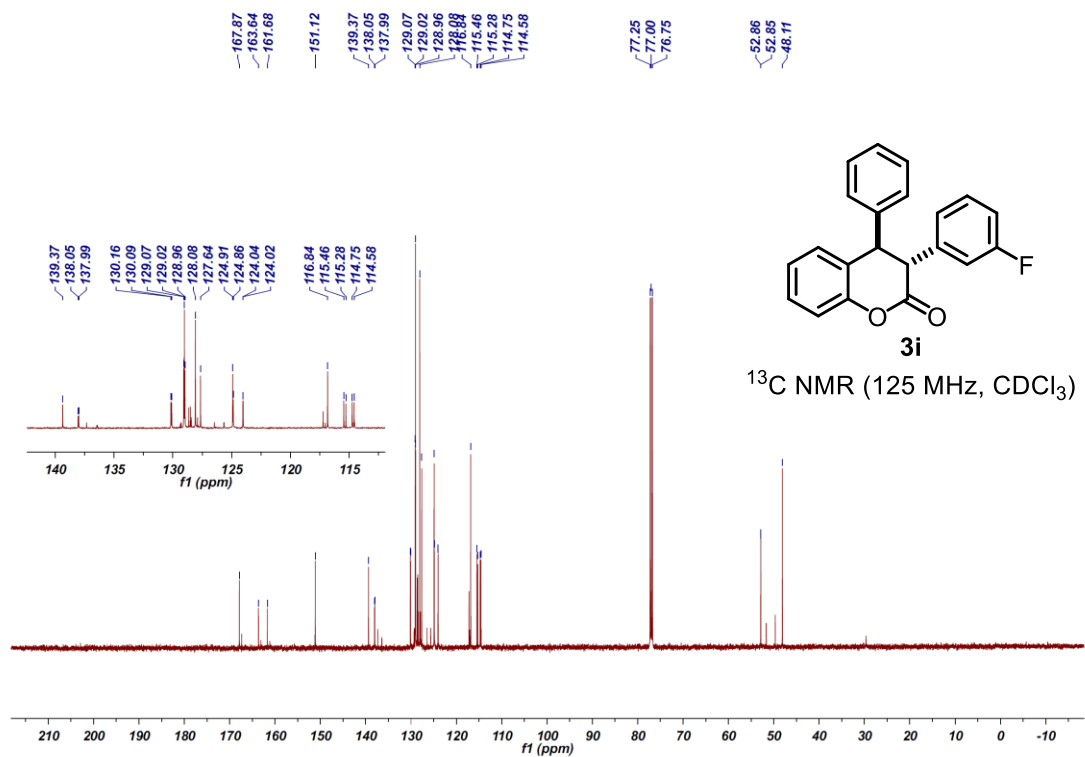

**3-(3-chlorophenyl)-4-phenylchroman-2-one (3j)**

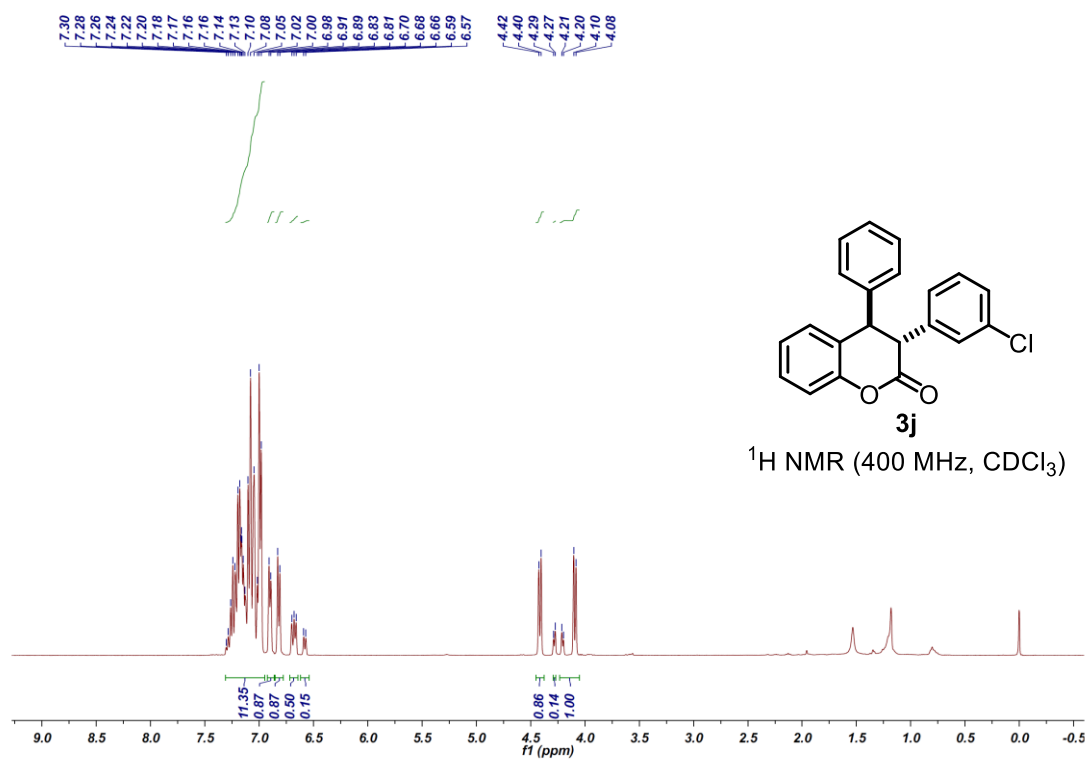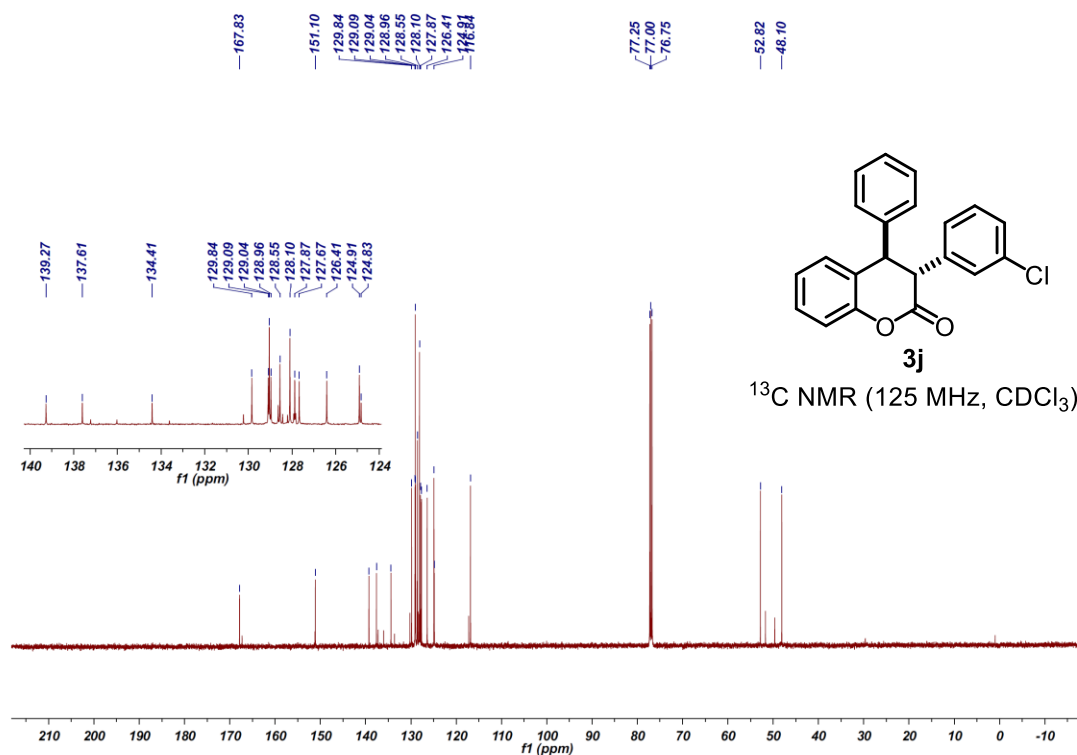

### 3-(3-bromophenyl)-4-phenylchroman-2-one (3k)

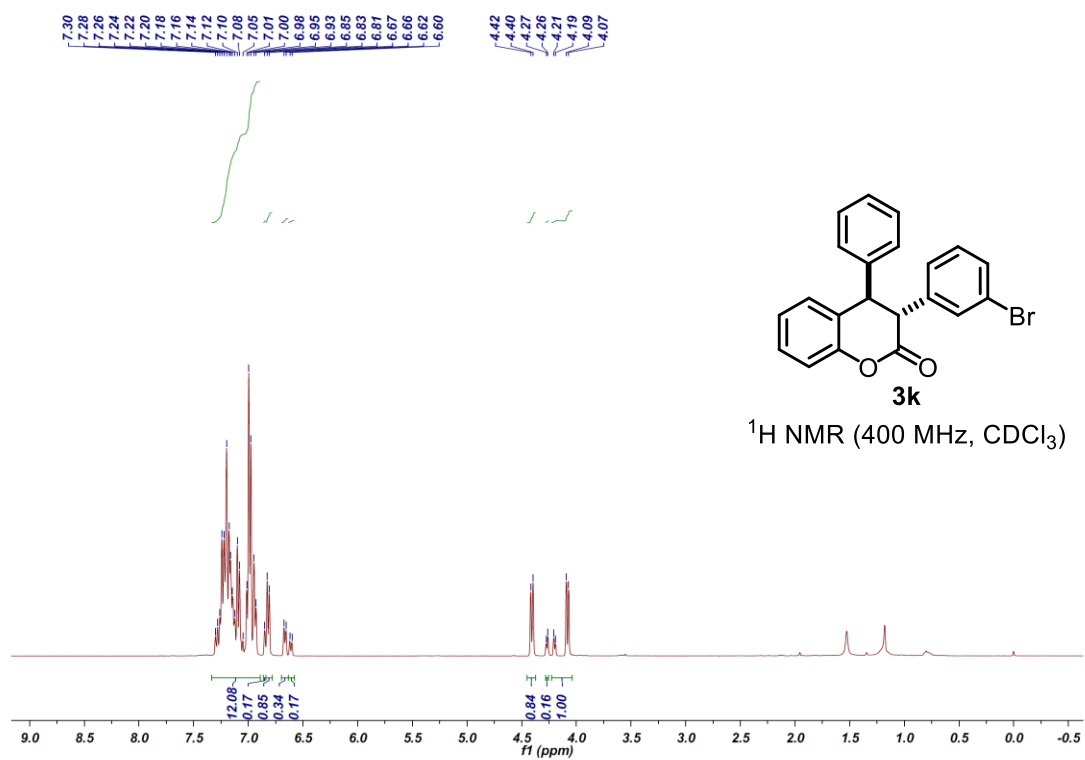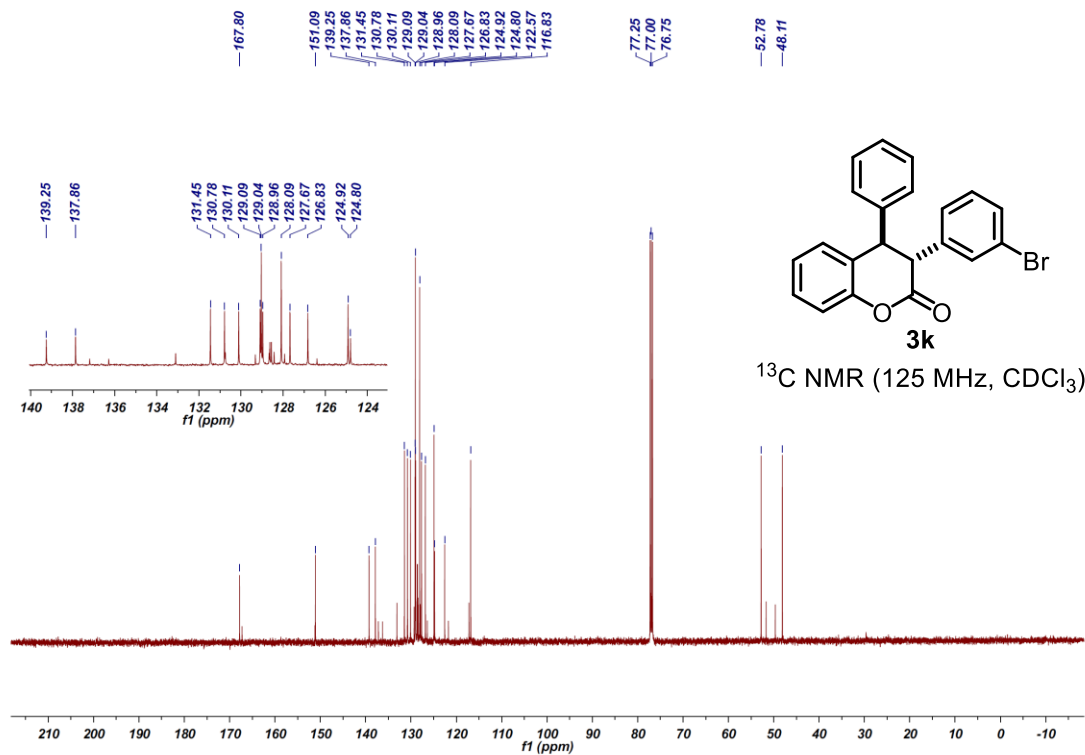

### 4-phenyl-3-(*o*-tolyl)chroman-2-one (3I)

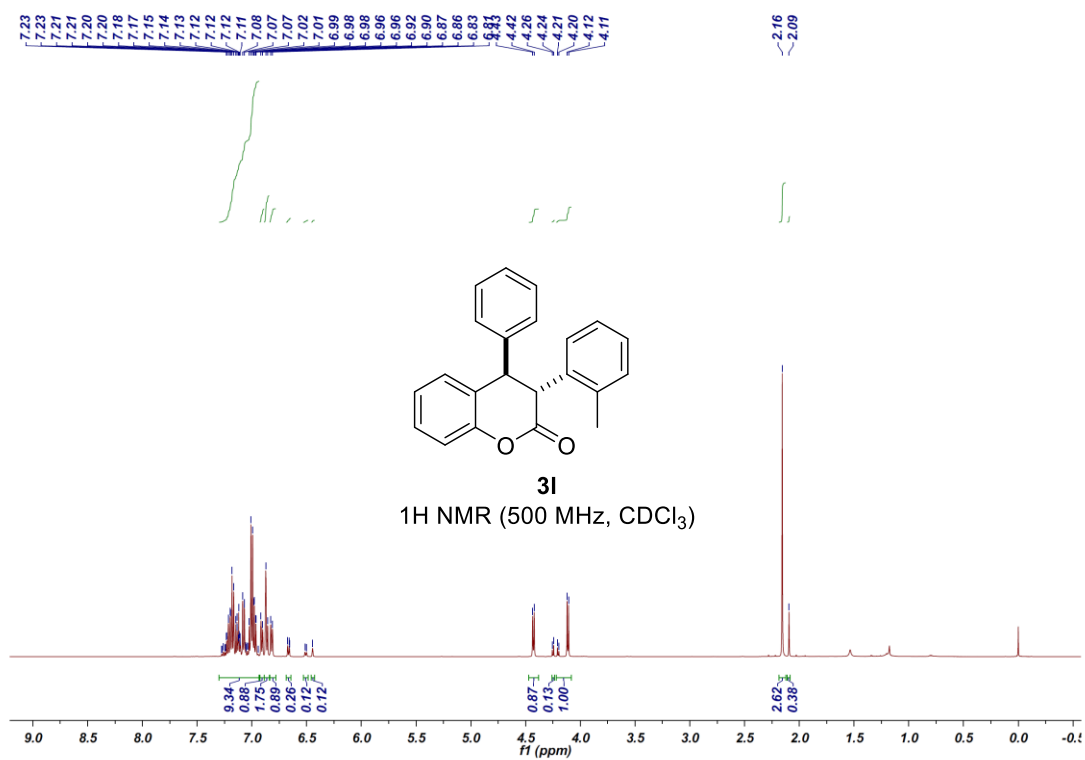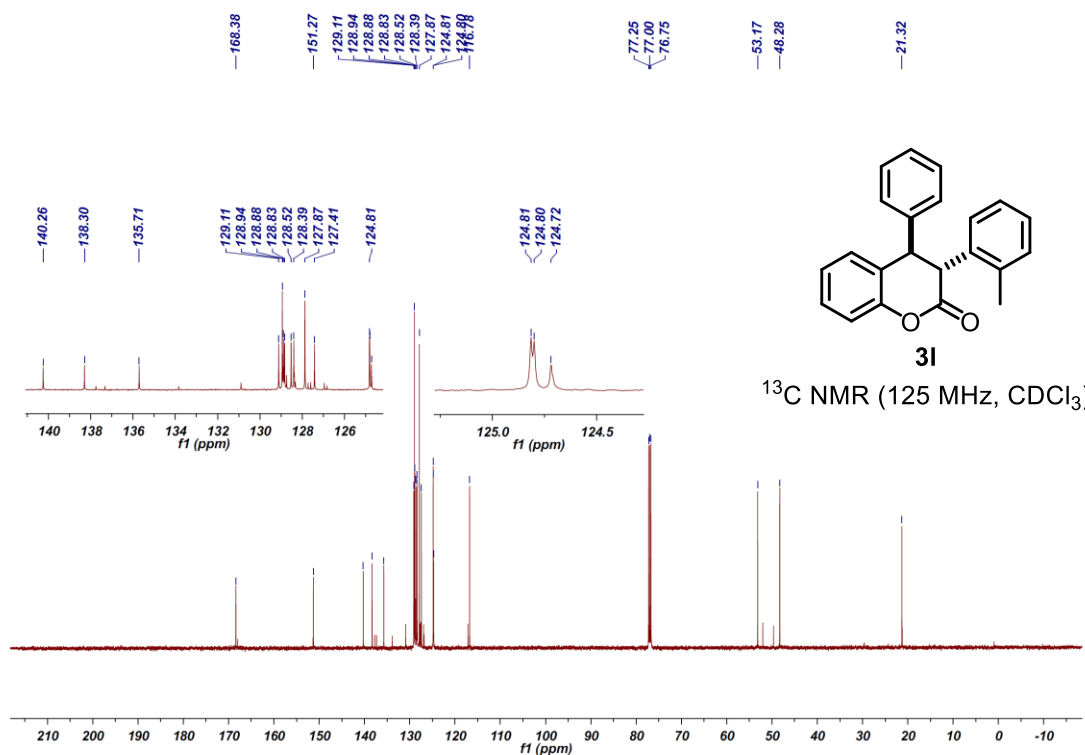



### 3-(naphthalen-1-yl)-4-phenylchroman-2-one (3m)

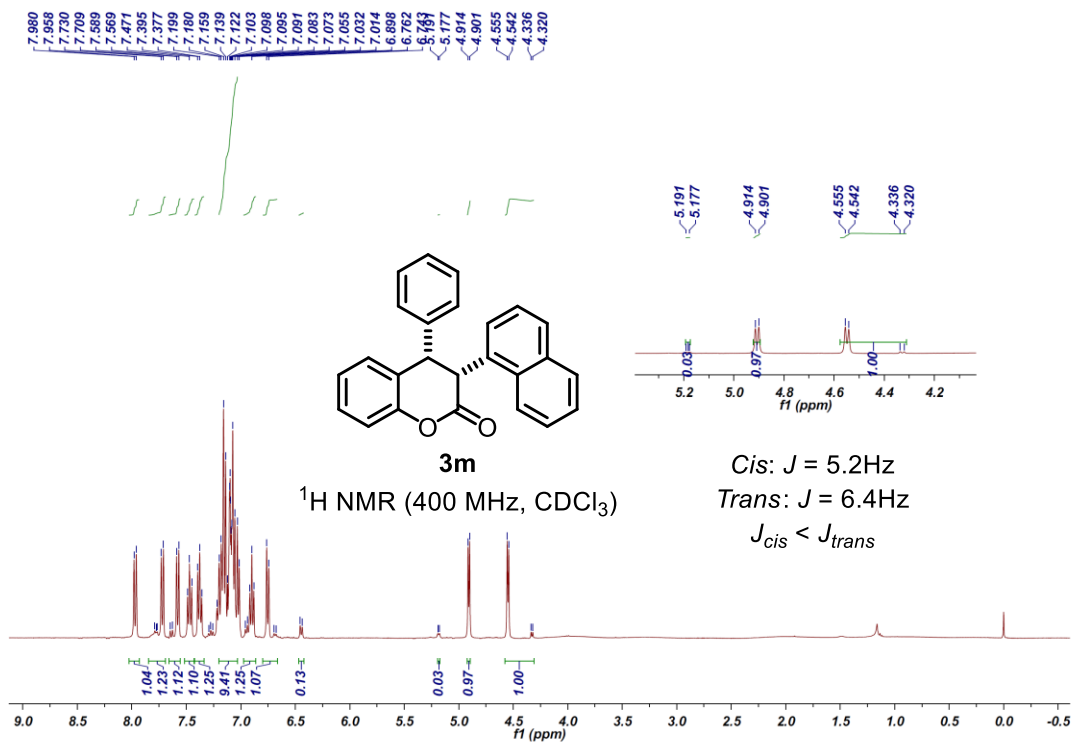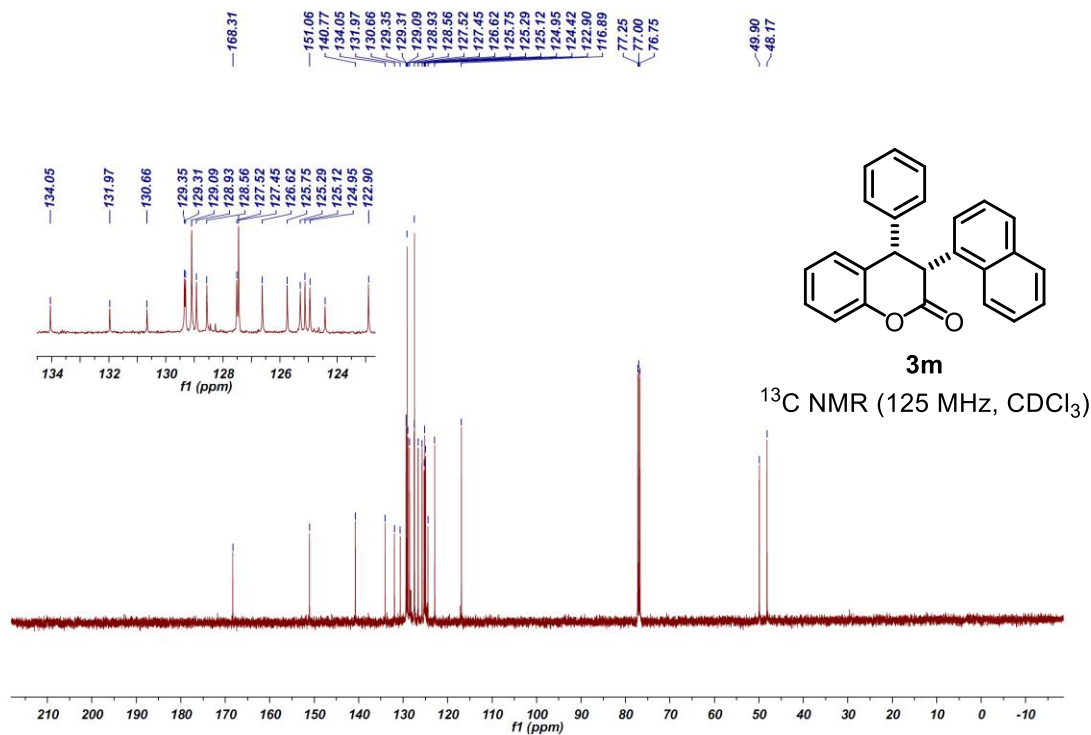

### 3-phenyl-4-(*m*-tolyl)chroman-2-one (3n)

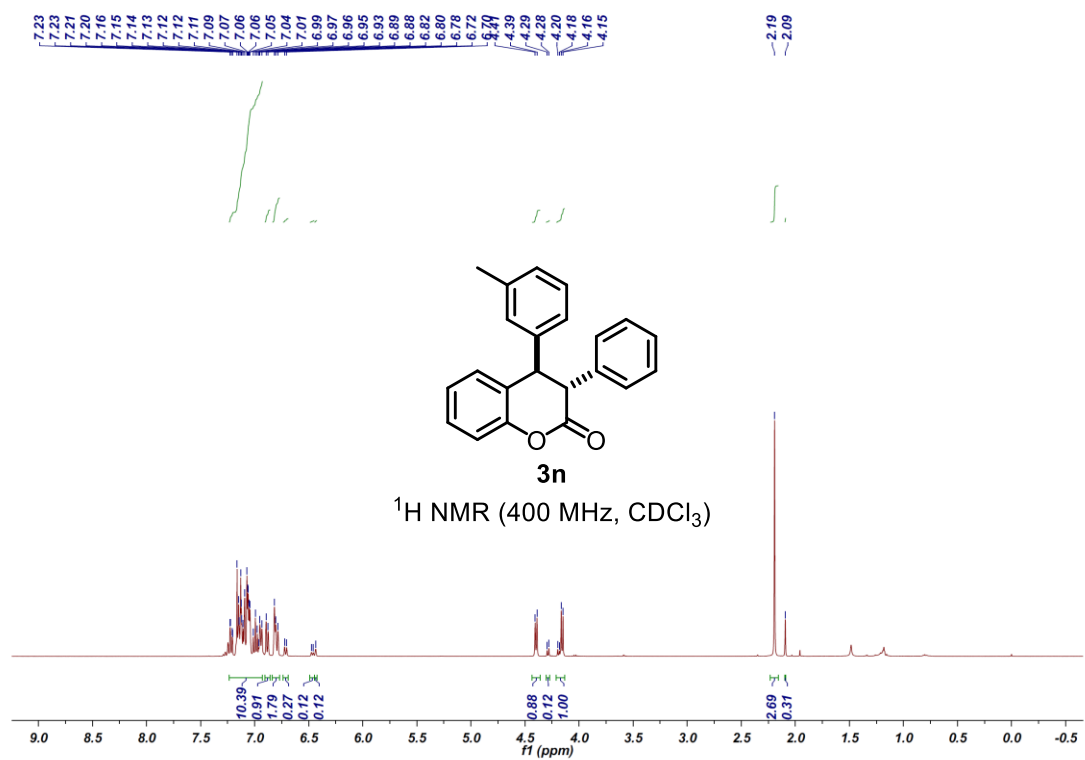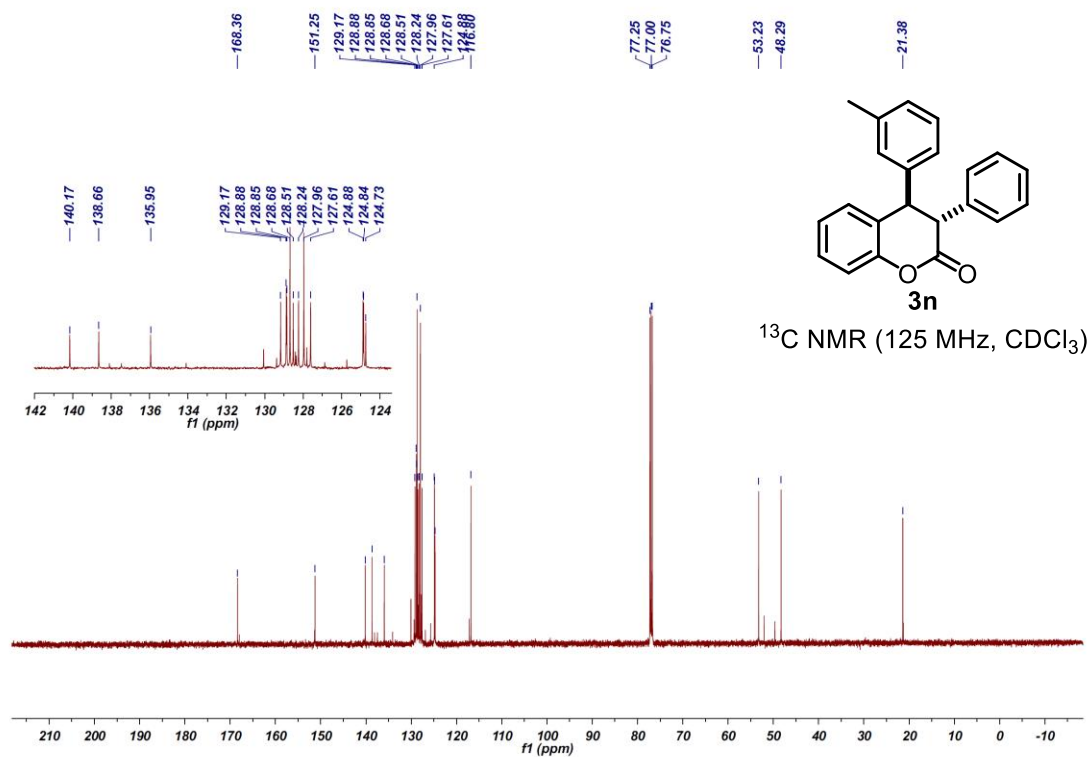

**4-(3-methoxyphenyl)-3-phenylchroman-2-one (3o)**

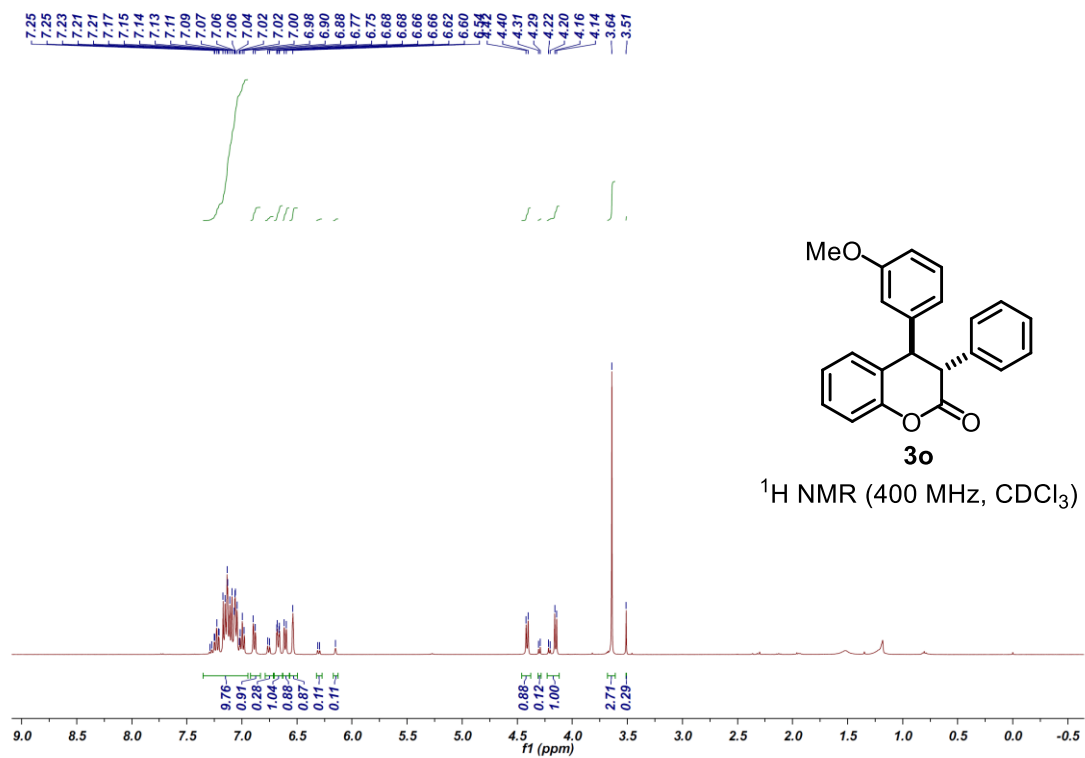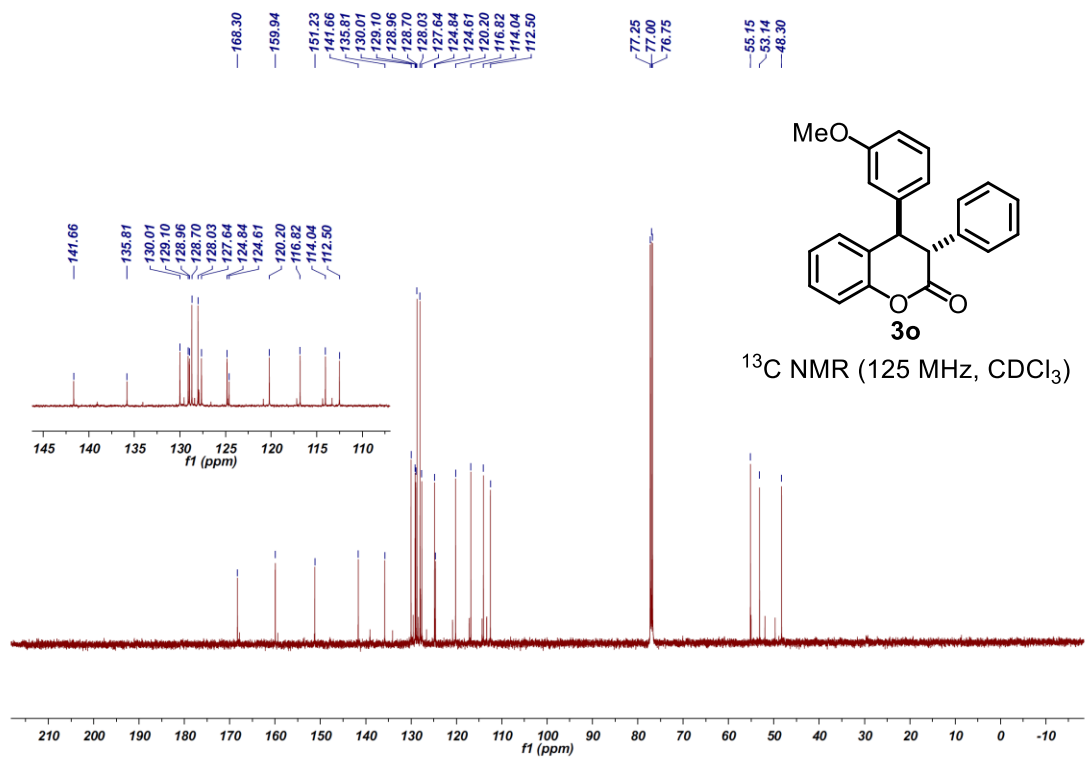

### 4-(3-fluorophenyl)-3-phenylchroman-2-one (3p)

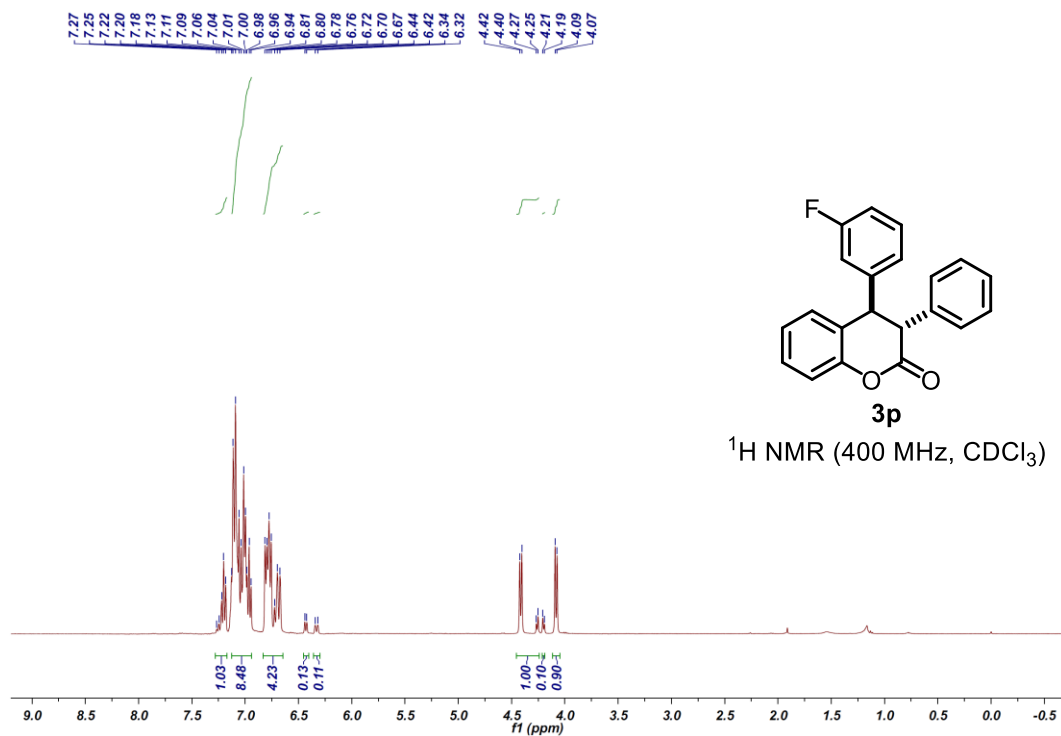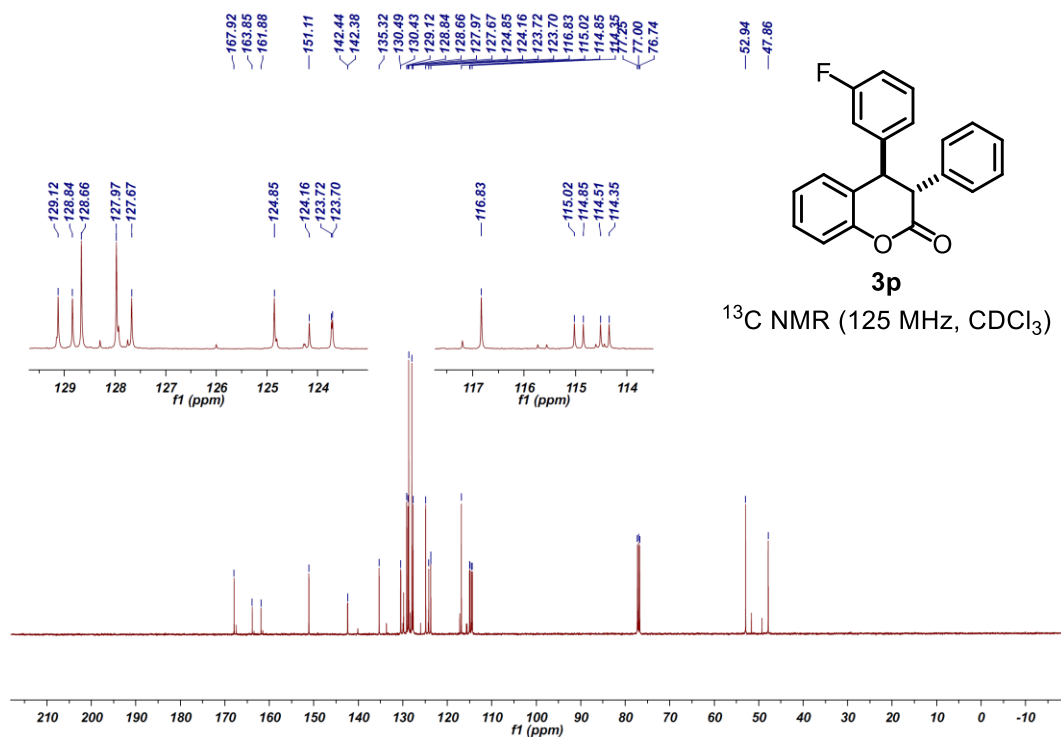

### 3-phenyl-4-(*p*-tolyl)chroman-2-one (3q)

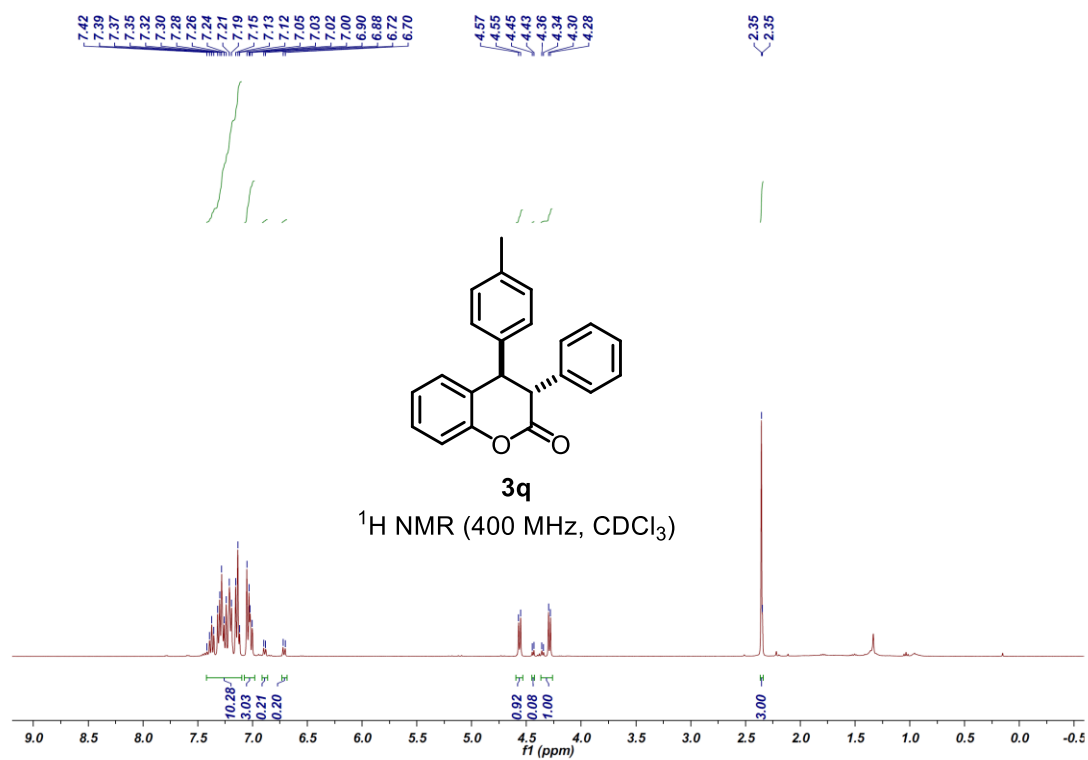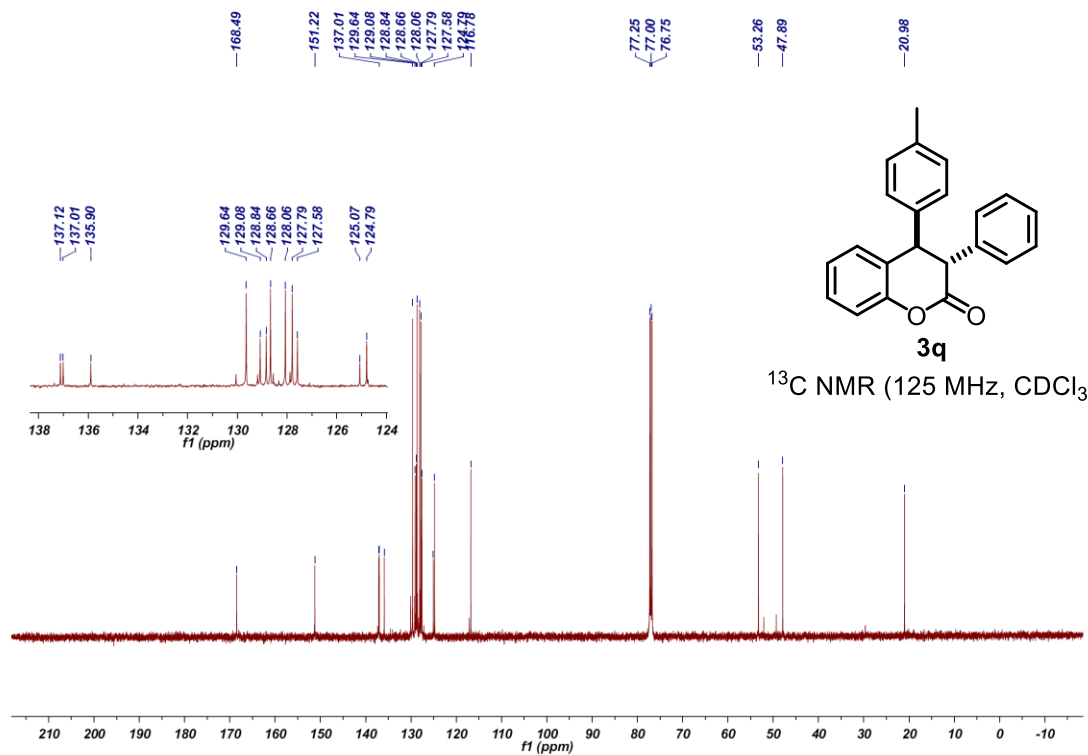

### 4-(4-methoxyphenyl)-3-phenylchroman-2-one (3r)

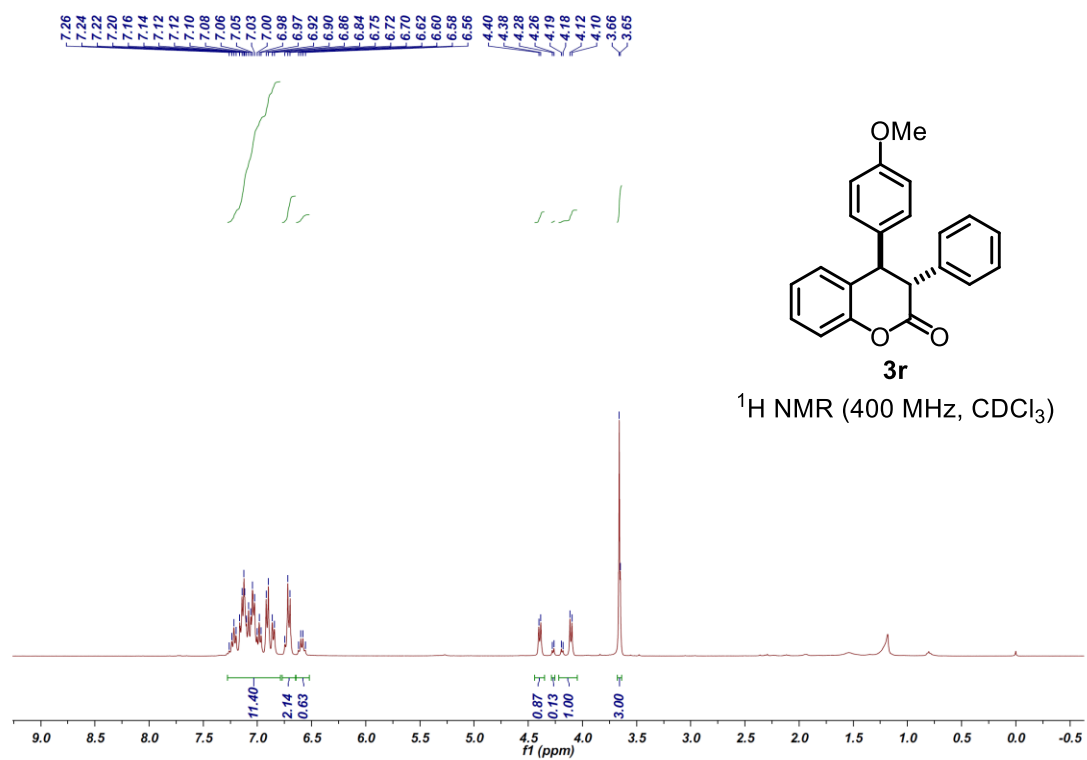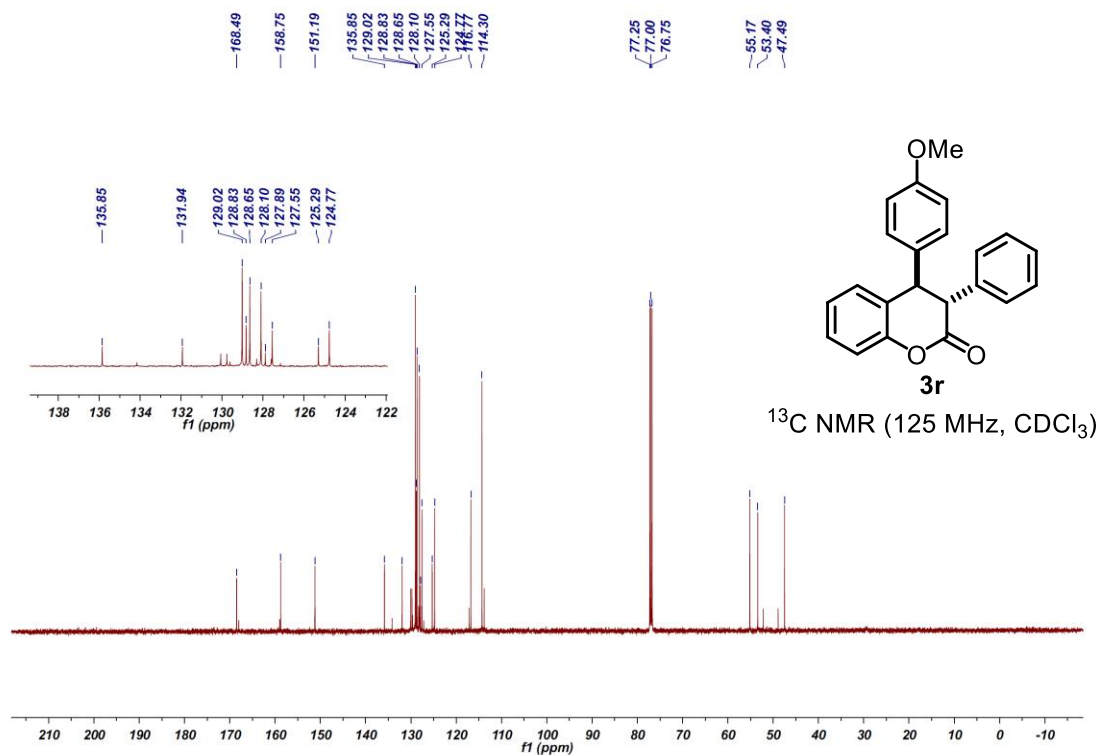

### 4-(4-chlorophenyl)-3-phenylchroman-2-one (3s)

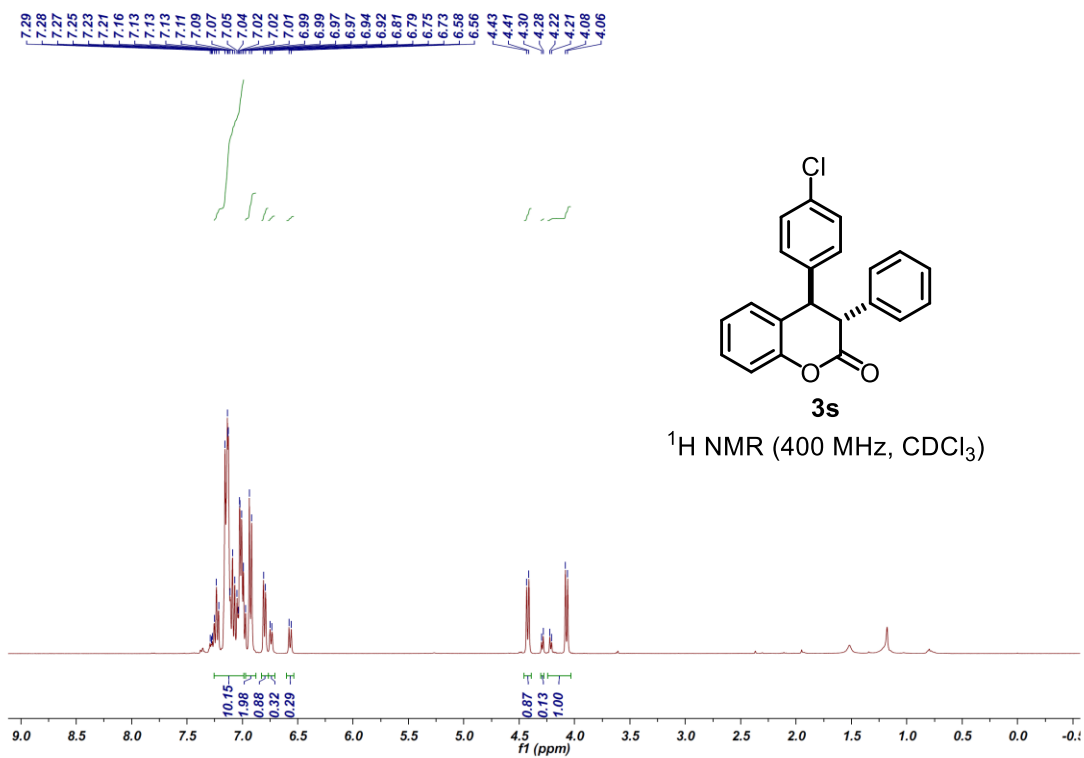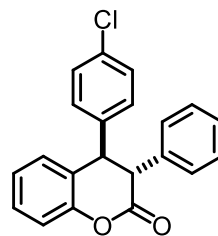

3s

<sup>1</sup>H NMR (400 MHz, CDCl<sub>3</sub>)

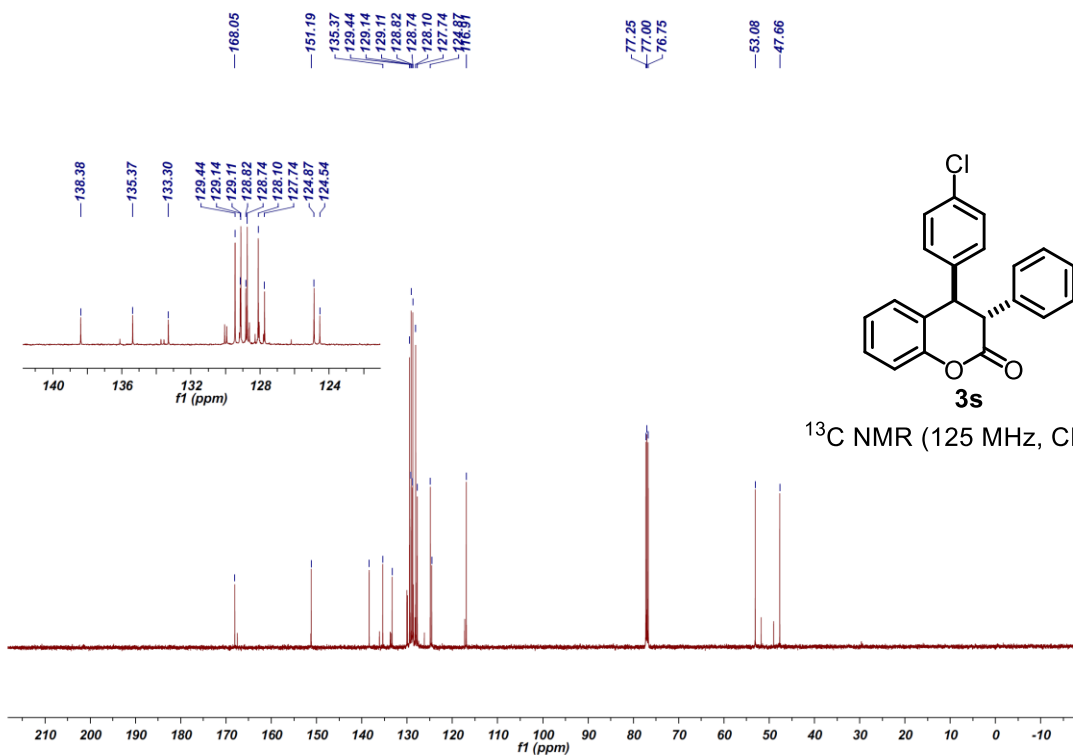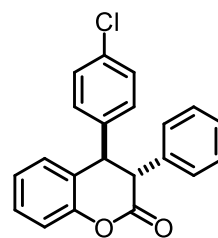

3s

<sup>13</sup>C NMR (125 MHz, CDCl<sub>3</sub>)

### 3-phenyl-4-(*o*-tolyl)chroman-2-one (3t)

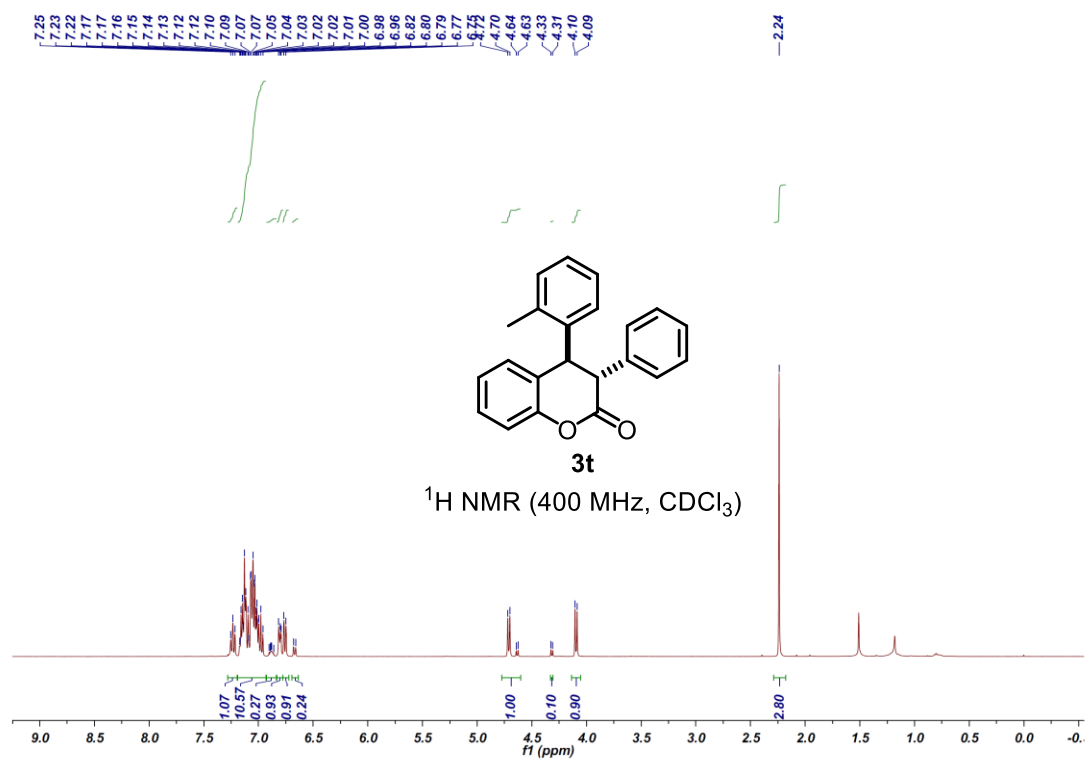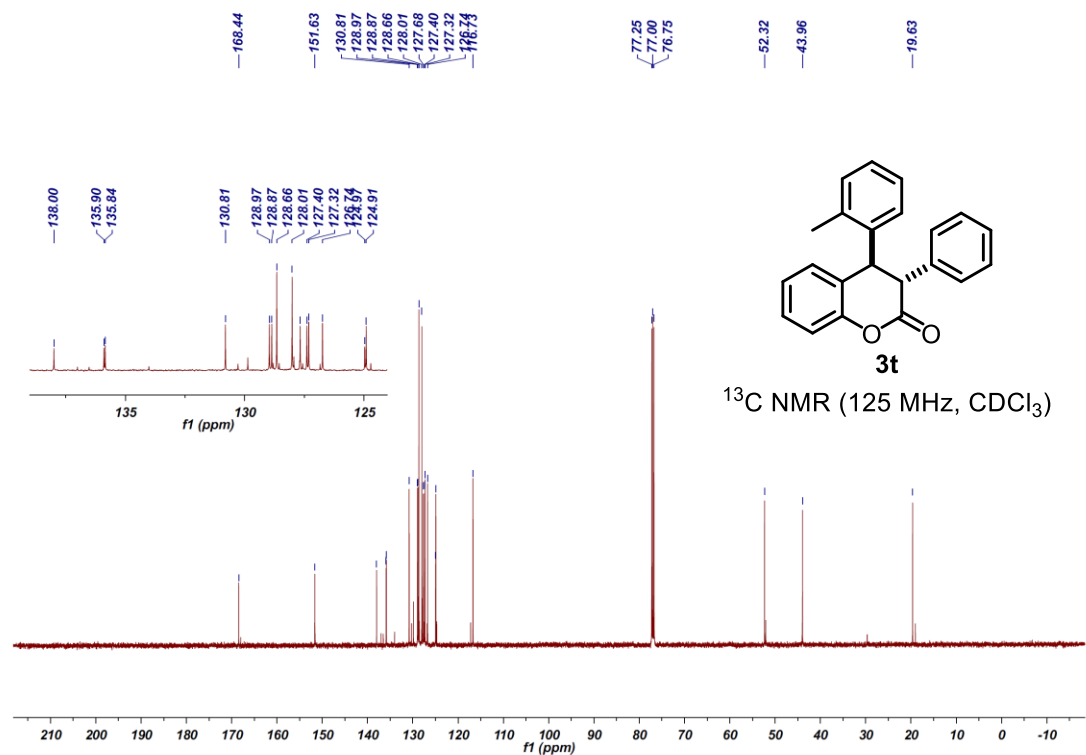



# 6-methyl-3,4-diphenylchroman-2-one (3u)

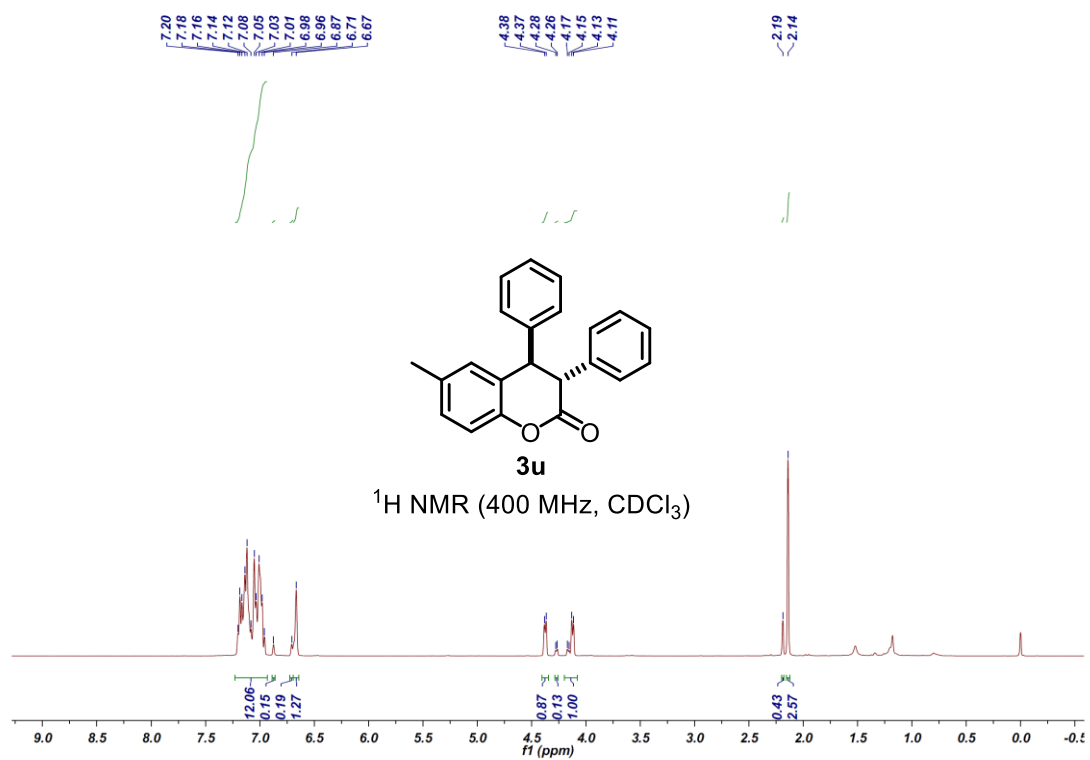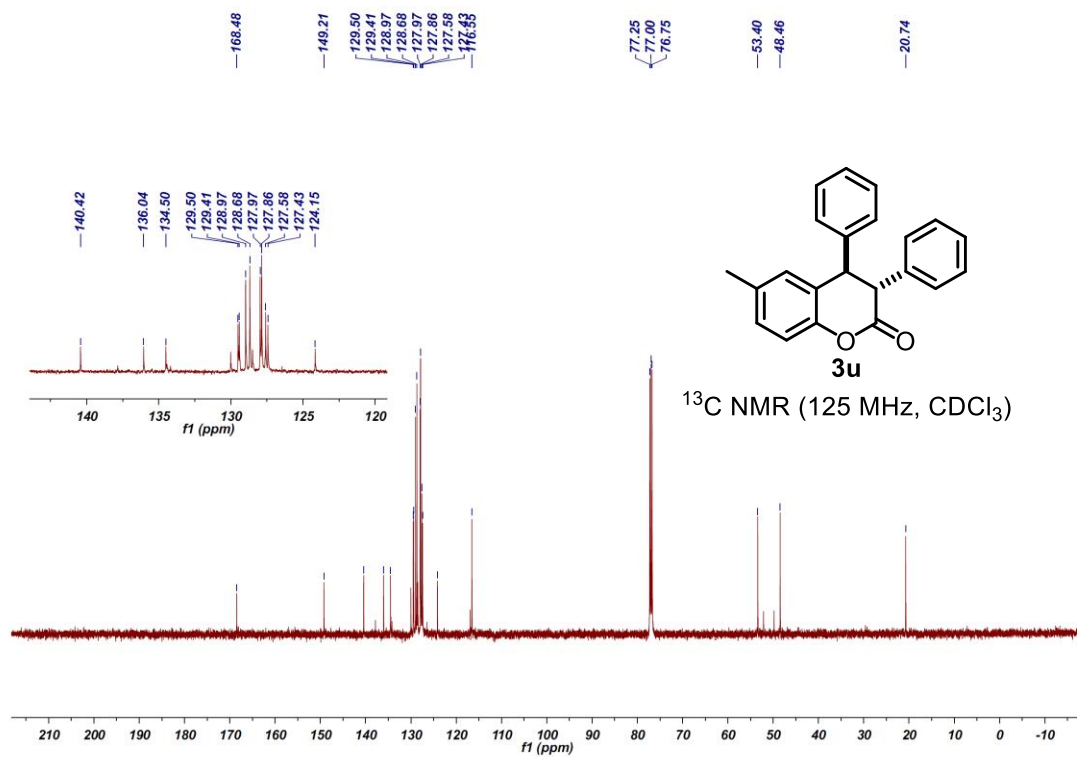

# 6-methoxy-3,4-diphenylchroman-2-one (3v)

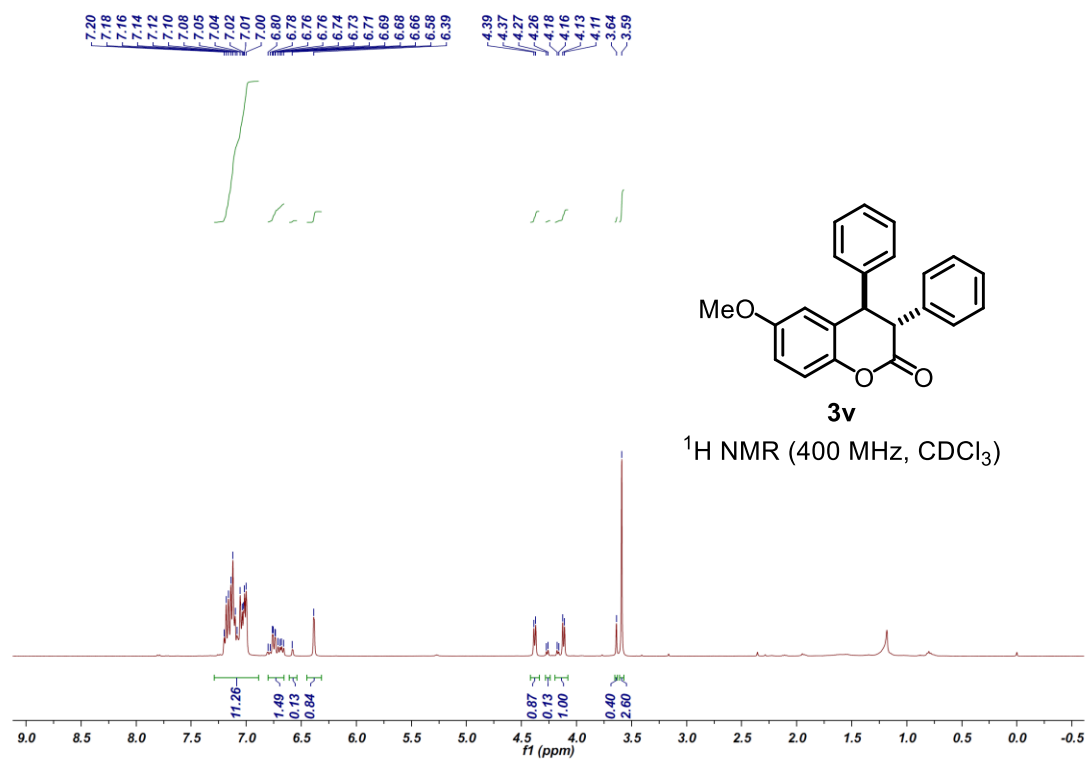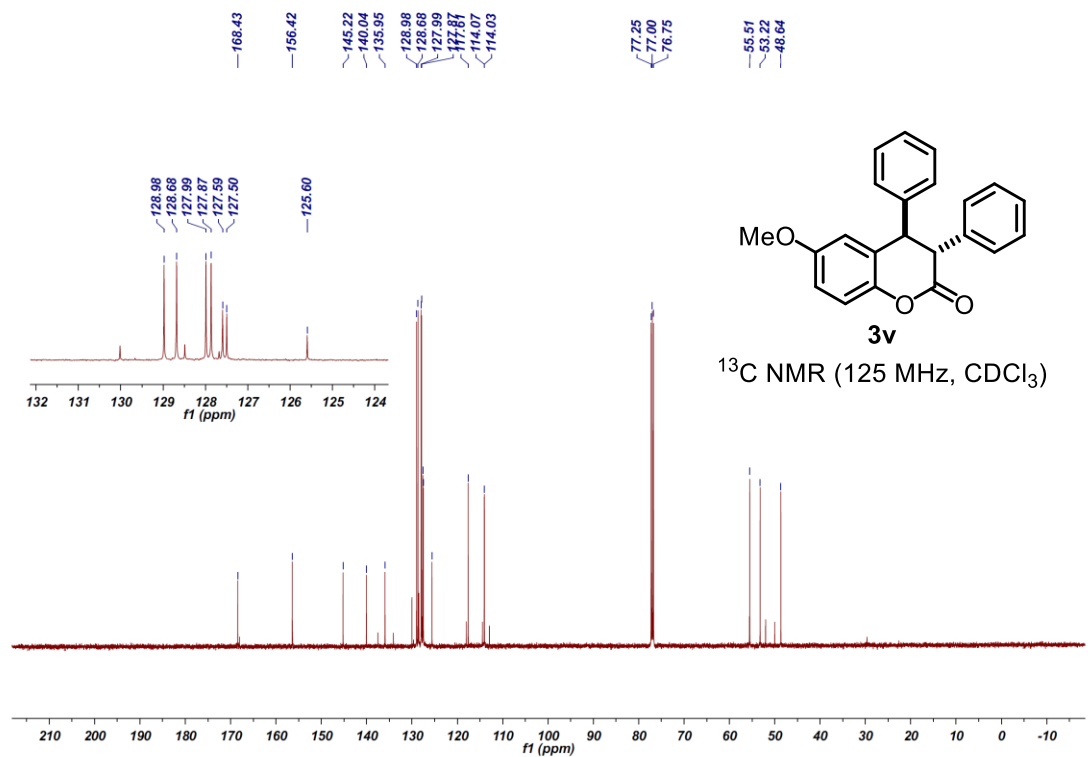

### 6-bromo-3,4-diphenylchroman-2-one (3w)

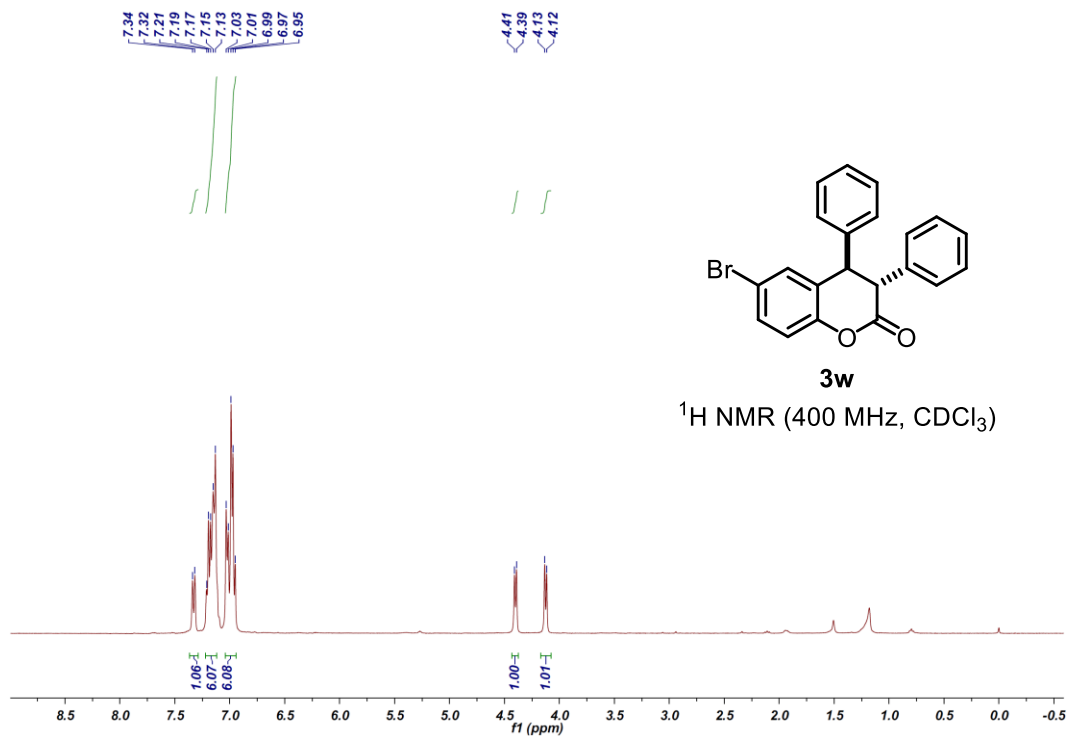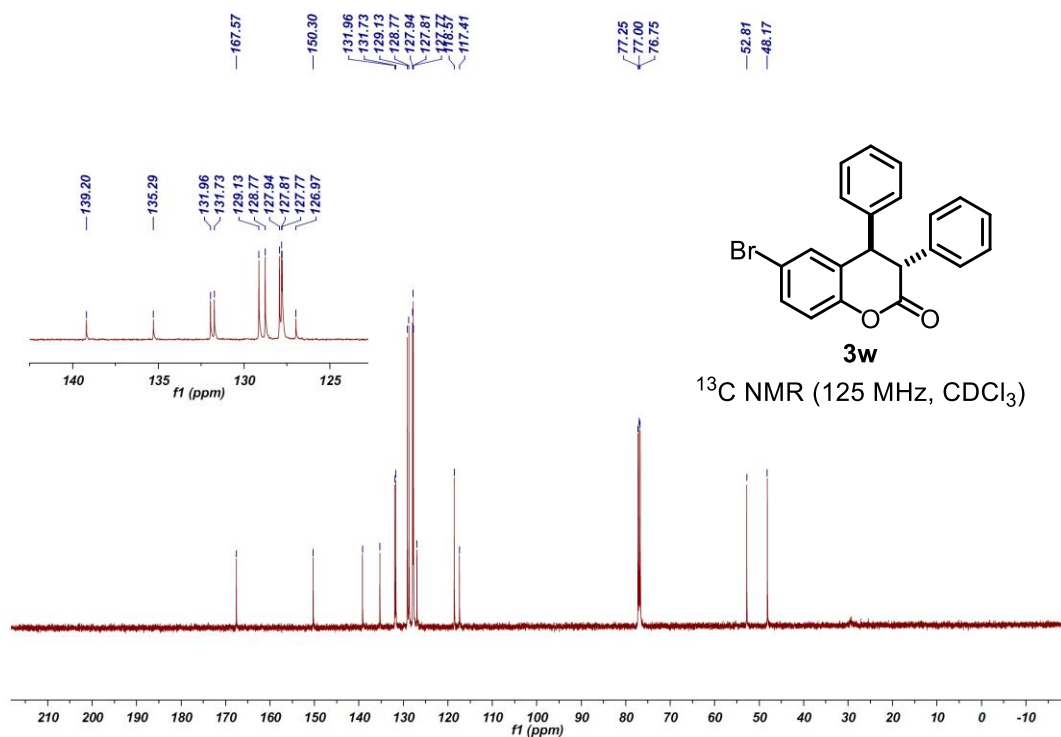

# 4-(naphthalen-1-yl)-3-phenylchroman-2-one (3x)

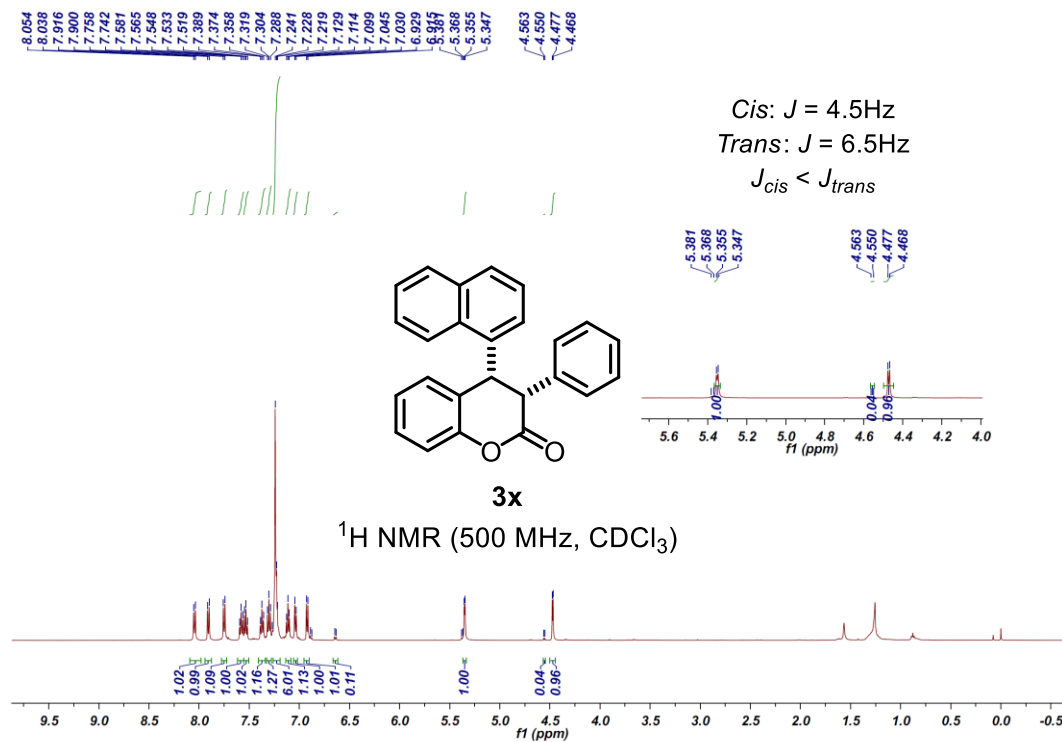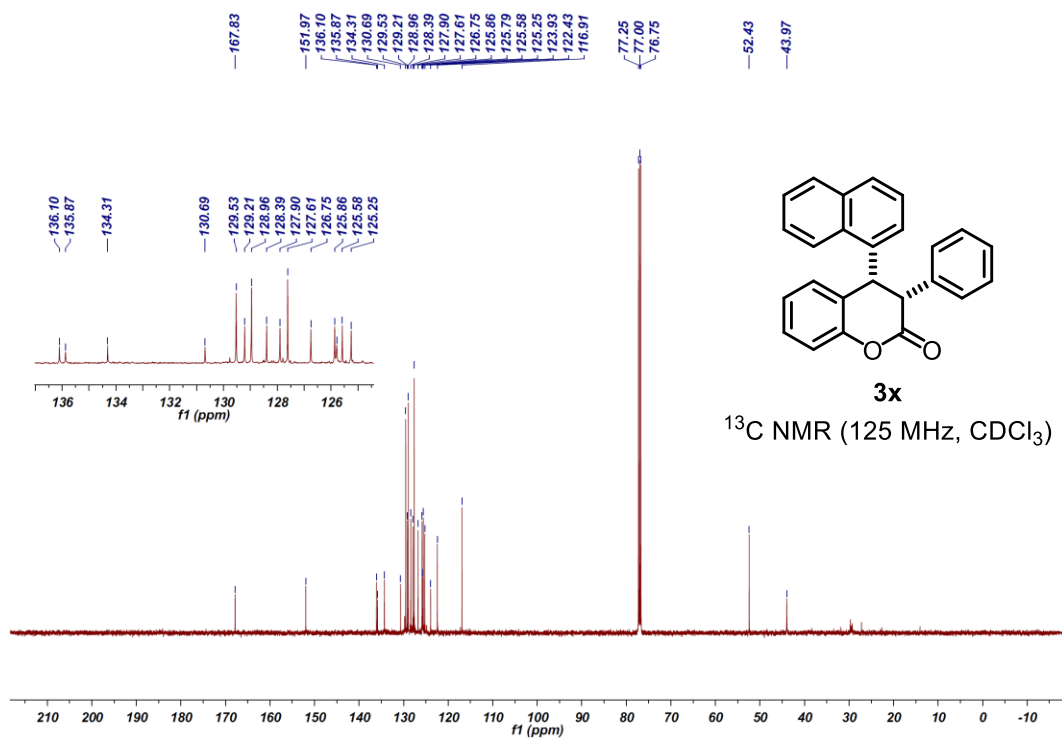

# 4-methyl-3-phenylchroman-2-one (3y)

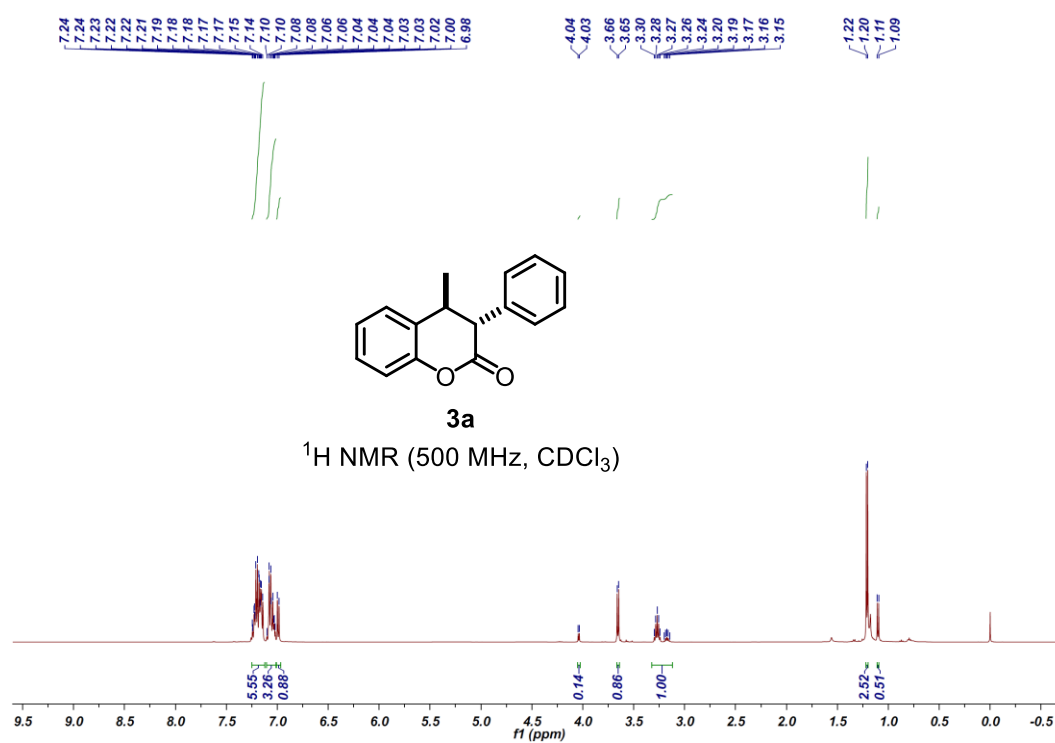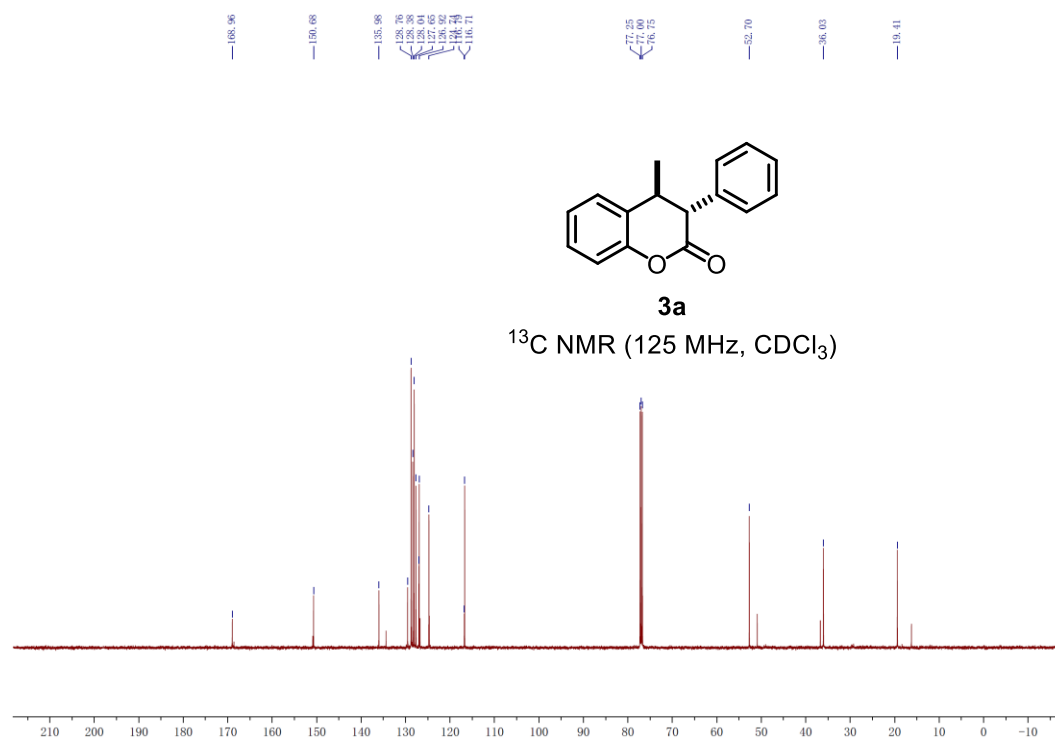

### 4-methyl-3-(naphthalen-1-yl)chroman-2-one (3z)

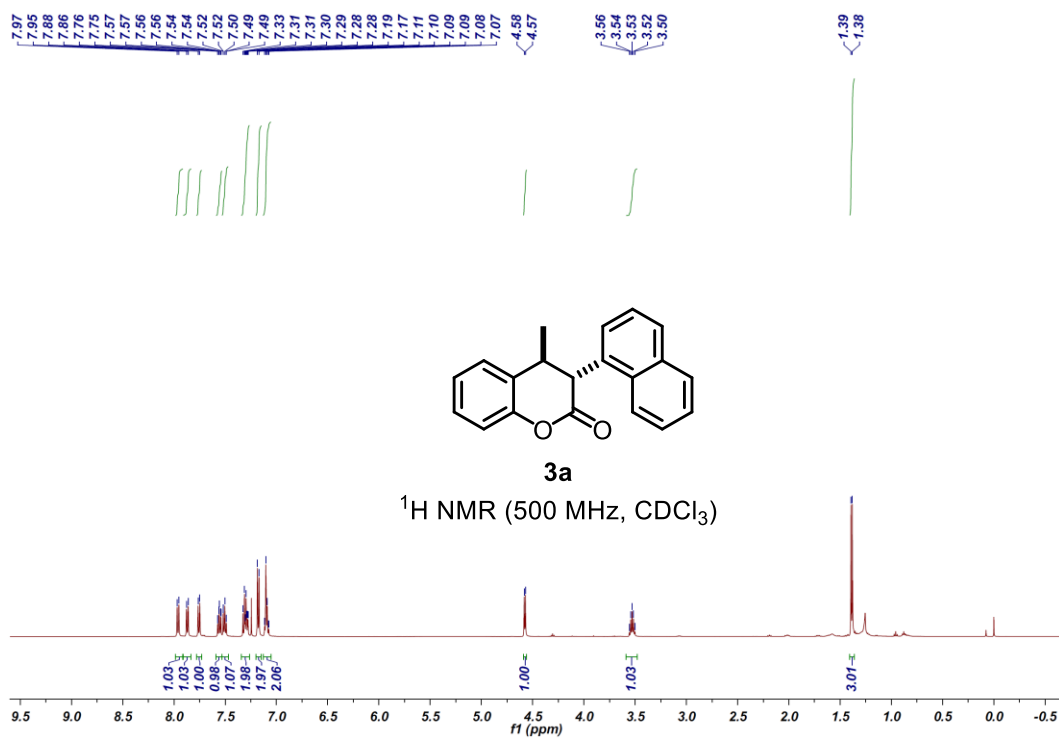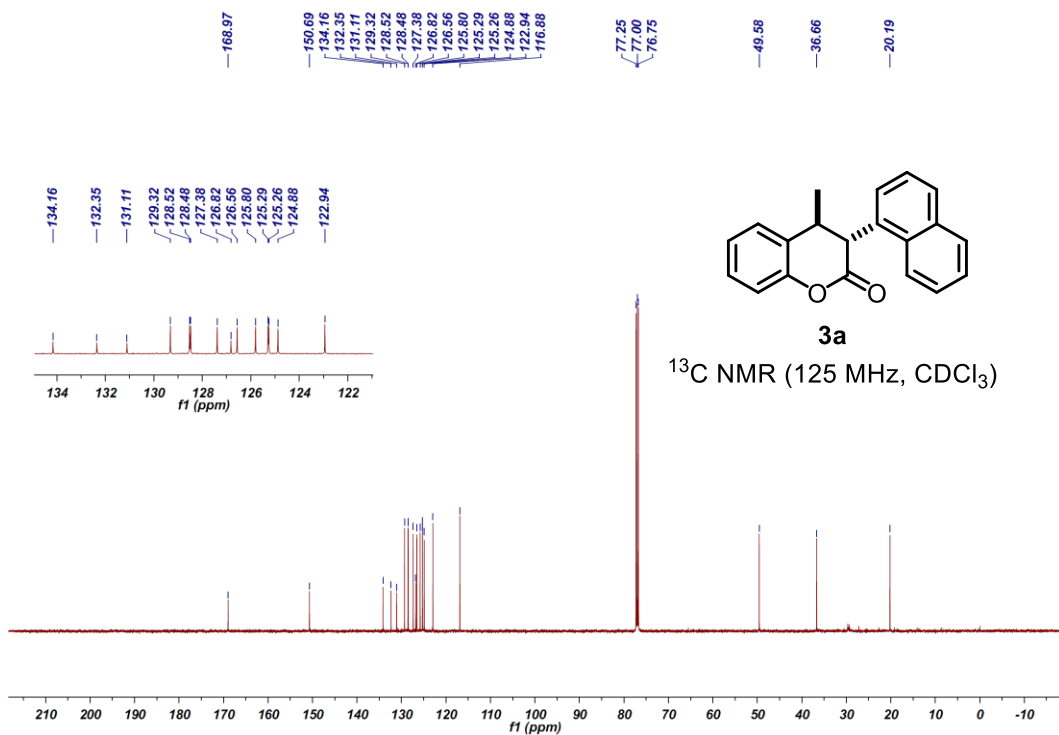

*N*-(3,4-diphenyl-4*H*-chromen-2-yl)-*N*,4-dimethylbenzenesulfonamide (3aa)

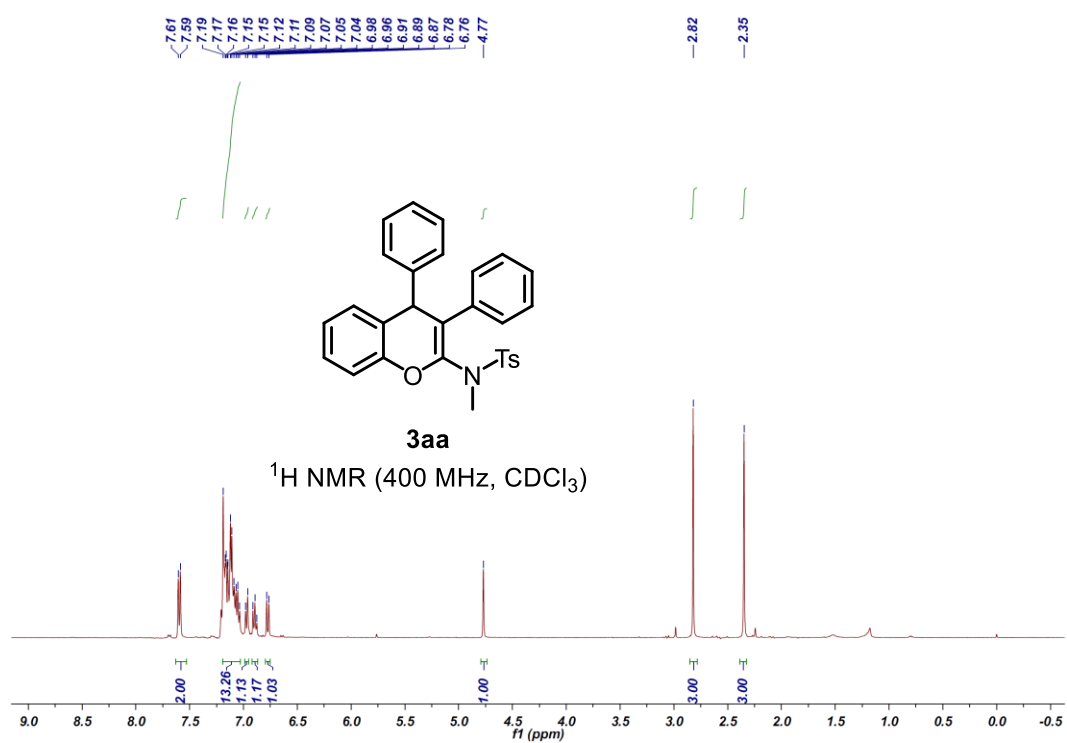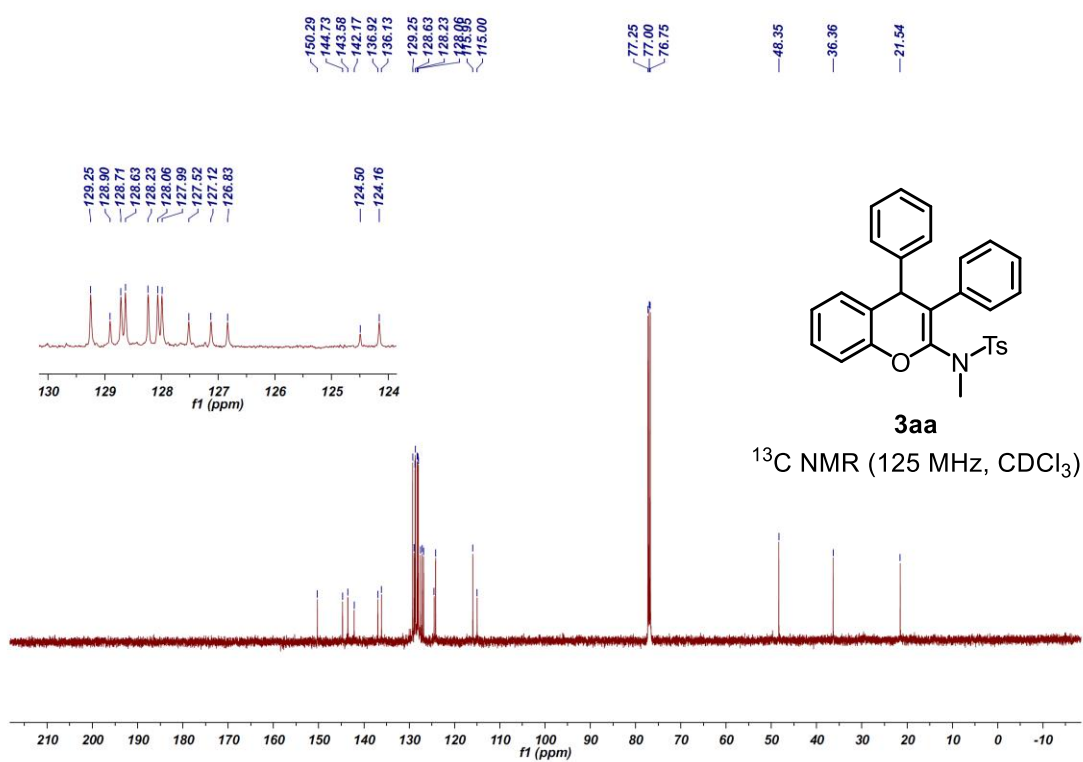

### *N*-methyl-2-phenyl-*N*-tosylacetamide (3ab)

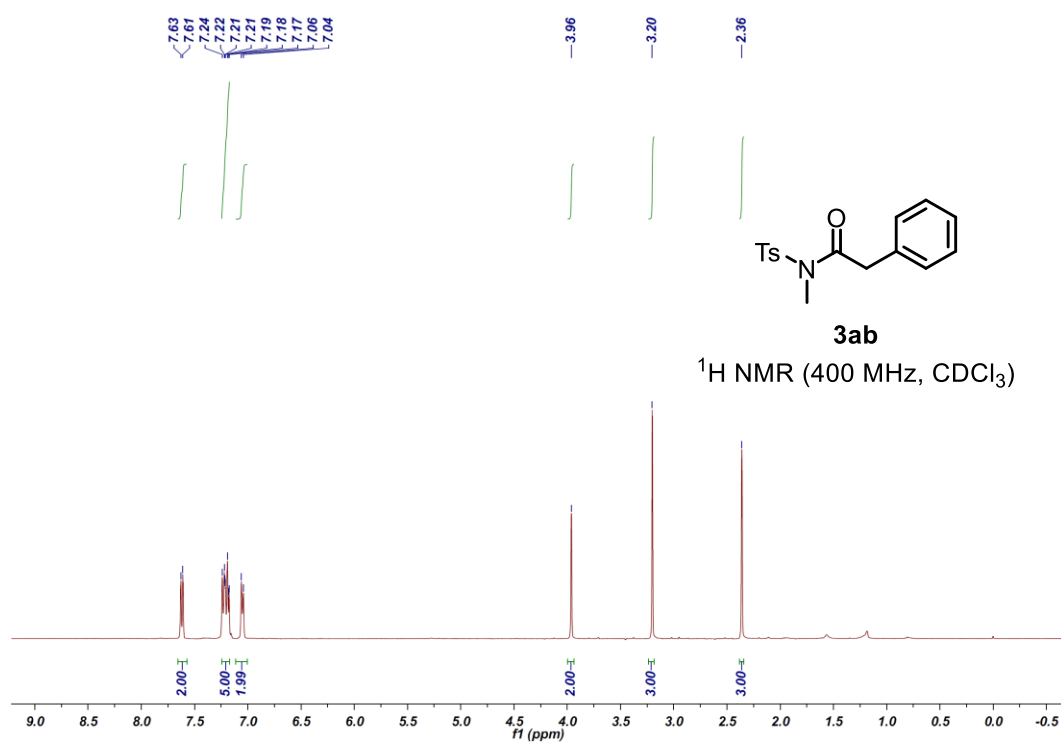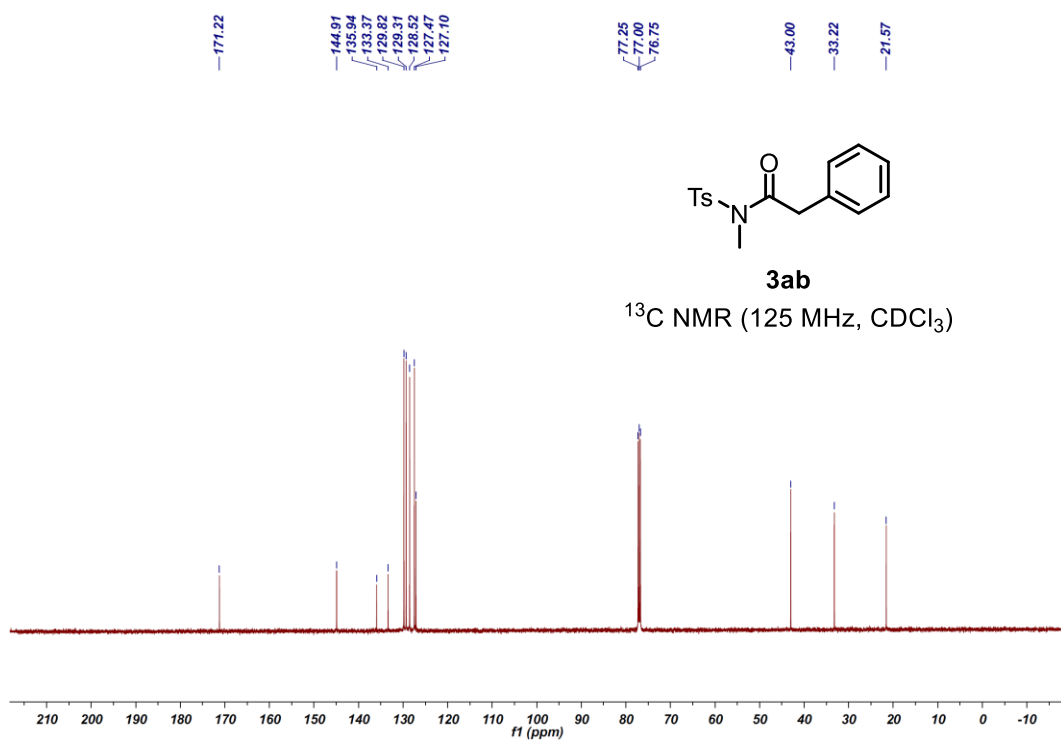



### 3,4-diphenyl-2H-chromen-2-one (4a)

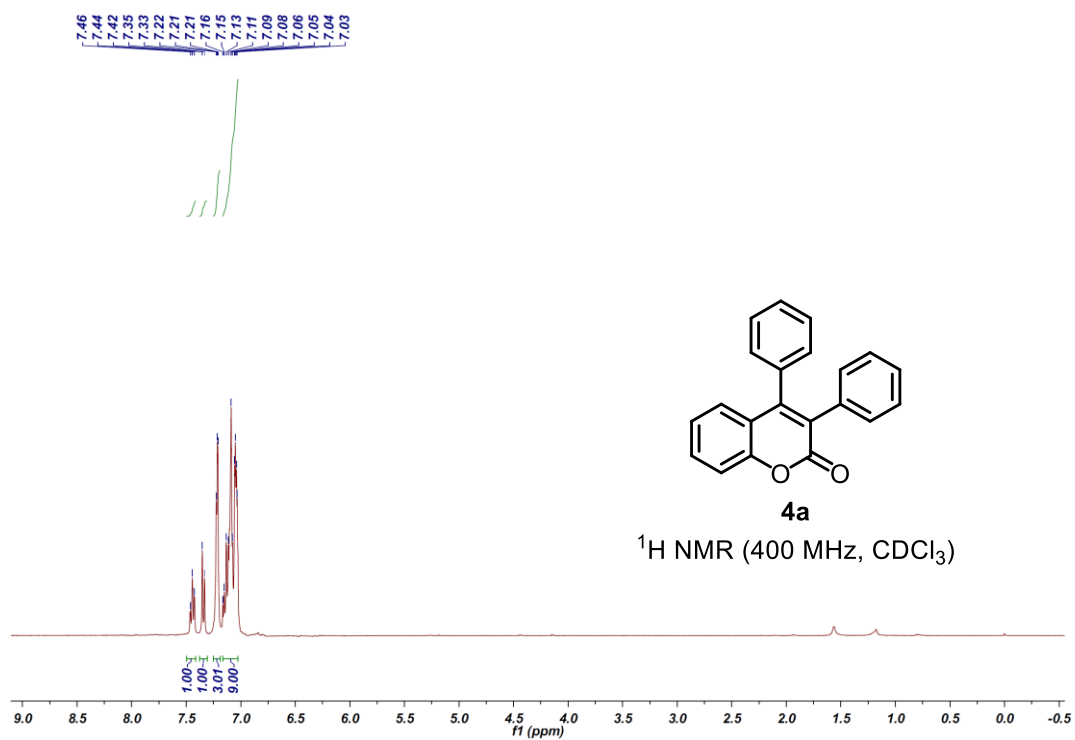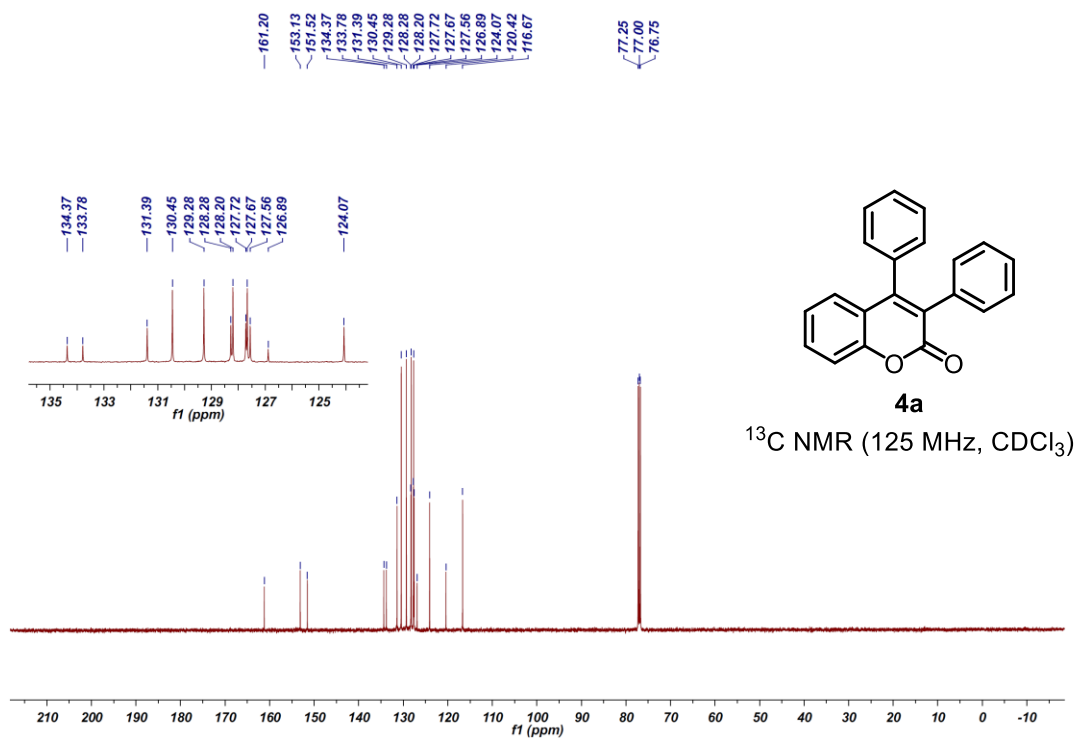

### 3,4-diphenylchromane (4b)

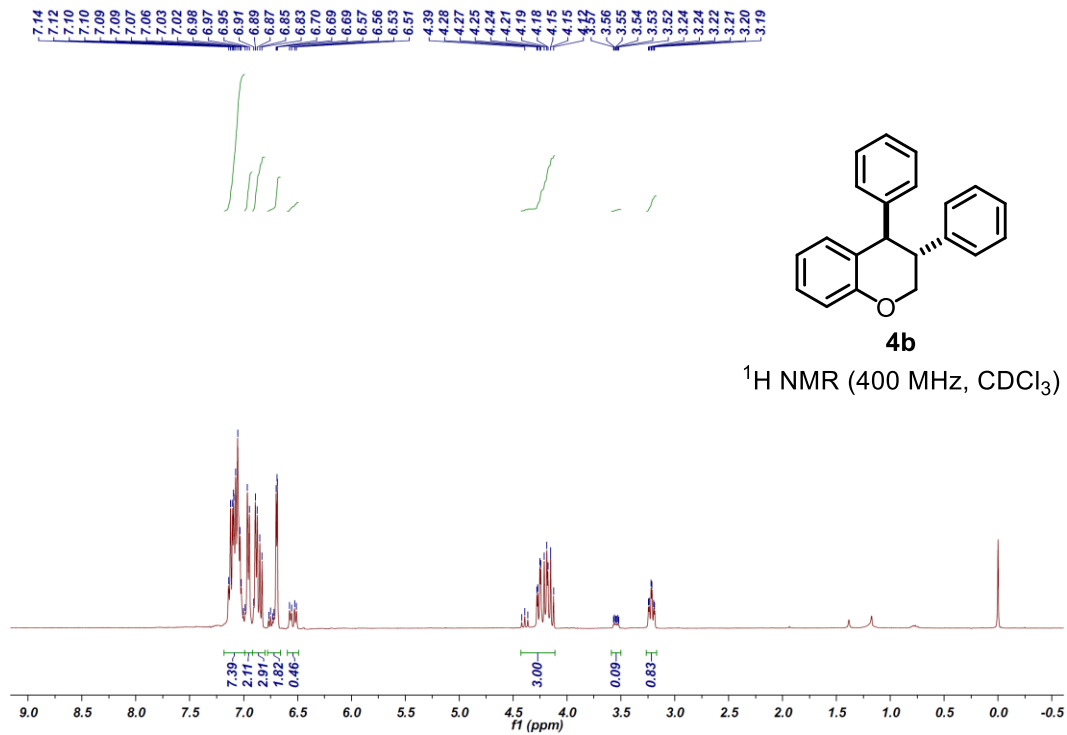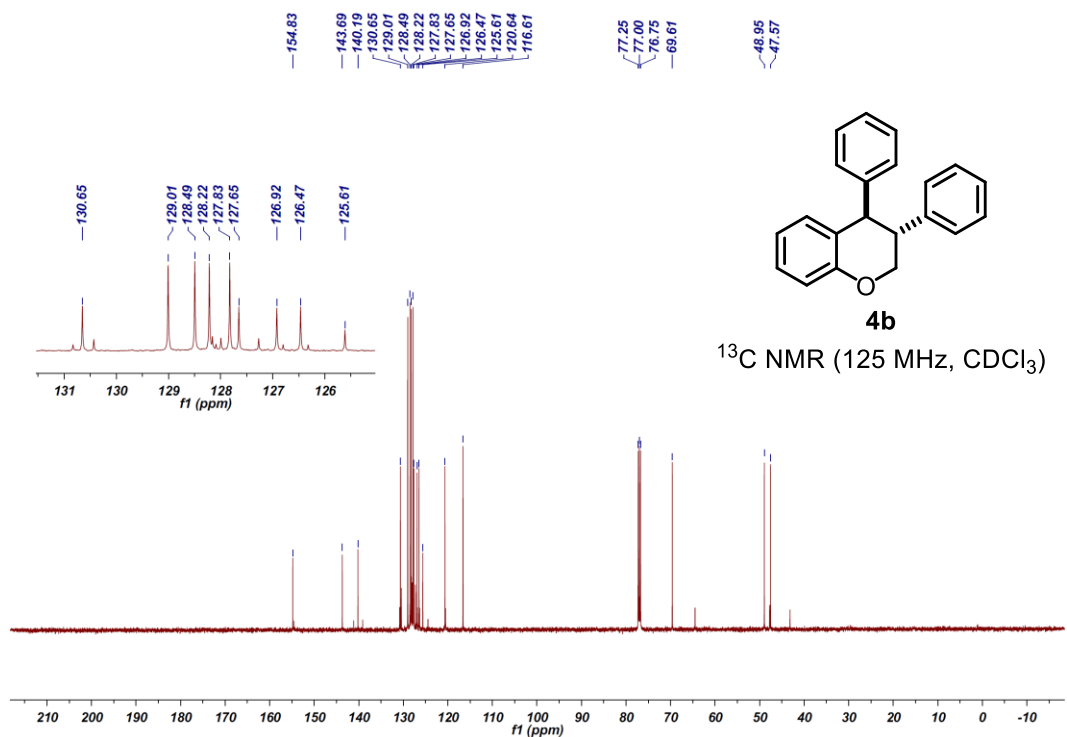

Supplement: d1cc00687h1.pdf [file d1cc00687h1.pdf]
